# Supplementary material for: The unfolded protein response and endoplasmic reticulum protein targeting machineries converge on the stress sensor IRE1
Source: eLife. 2018 Dec 24;7:e43036. doi: 10.7554/eLife.43036 (PMC6336407; doi:10.7554/eLife.43036)
Supplement: Supplementary file 1. [file elife-43036-supp1.xlsx]

## Sheet: Sheet1
Gene identifiers					Control - Replicate 1					Control - Replicate 2					GeoMean Averages - Control					ER stress - Replicate 1					ER stress - Replicate 2					GeoMean Averages - ER stress					Fold change ER stress		Call		Signal peptide, membrane, secreted
entrez_id	symbol	name	locus_group	locus_type	Copies	T2C	T2C/Copies	Log Copies	Log T2C	Copies	T2C	T2C/Copies	Log Copies	Log T2C	Copies	T2C	T2C/Copies	Log Copies	Log T2C	Copies	T2C	T2C/Copies	Log Copies	Log T2C	Copies	T2C	T2C/Copies	Log Copies	Log T2C	Copies	T2C	T2C/Copies	Log Copies	Log T2C	FC Copies	Log 2 FC Copies	Control	ER Stress	Uniprot_SP	Uniprot_TM	HPA_membrane	HPA_secreted	HPA_mem+sec
60	ACTB	actin, beta	protein-coding gene	gene with protein product	3.31212	3.31212	1	0.520106	0.520106	N/A	N/A	N/A	N/A	N/A	N/A	N/A	N/A	N/A	N/A	8.28294	4.32153	0.521739	0.918185	0.635638	34.399	32.306	0.939153	1.53655	1.50928	16.8797	11.8157	0.699995	1.22737	1.07246	N/A	N/A		Bound
71	ACTG1	actin gamma 1	protein-coding gene	gene with protein product	N/A	N/A	N/A	N/A	N/A	5.01964	2.28165	0.454545	0.700673	0.358249	N/A	N/A	N/A	N/A	N/A	7.56268	2.70096	0.357143	0.878676	0.431518	12.3764	9.28227	0.75	1.09259	0.967654	9.67463	5.0071	0.517549	0.985634	0.699586	N/A	N/A		Bound
162	AP1B1	adaptor-related protein complex 1, beta 1 subunit	protein-coding gene	gene with protein product	N/A	N/A	N/A	N/A	N/A	3.0422	3.0422	1	0.483188	0.483188	N/A	N/A	N/A	N/A	N/A	3.96141	3.60128	0.90909	0.59785	0.556457	7.09821	7.09821	1	0.851149	0.851149	5.30273	5.05595	0.953462	0.724499	0.703803	N/A	N/A		Bound		X
334	APLP2	amyloid beta (A4) precursor-like protein 2	protein-coding gene	gene with protein product	7.82865	7.82865	1	0.893687	0.893687	N/A	N/A	N/A	N/A	N/A	N/A	N/A	N/A	N/A	N/A	7.92281	7.74275	0.977273	0.898879	0.888895	16.1985	16.1075	0.994382	1.20947	1.20703	11.3286	11.1676	0.985791	1.05418	1.04796	N/A	N/A		Bound	X	X			X
351	APP	amyloid beta (A4) precursor protein	protein-coding gene	gene with protein product	3.61322	1.50551	0.416667	0.557894	0.177684	N/A	N/A	N/A	N/A	N/A	N/A	N/A	N/A	N/A	N/A	11.164	10.9839	0.98387	1.04782	1.04076	15.1064	15.1064	1	1.17916	1.17916	12.9864	12.8813	0.991902	1.11349	1.10996	N/A	N/A		Bound	X	X	X
440	ASNS	asparagine synthetase (glutamine-hydrolyzing)	protein-coding gene	gene with protein product	N/A	N/A	N/A	N/A	N/A	3.65065	3.65065	1	0.56237	0.56237	N/A	N/A	N/A	N/A	N/A	5.40192	5.40192	1	0.732548	0.732548	14.1054	10.8748	0.770966	1.14939	1.03642	8.72906	7.66452	0.878047	0.940967	0.884485	N/A	N/A		Bound
476	ATP1A1	ATPase, Na+/K+ transporting, alpha 1 polypeptide	protein-coding gene	gene with protein product	38.6916	31.2393	0.807393	1.58762	1.4947	7.30129	7.30129	1	0.8634	0.8634	16.8077	15.1026	0.89855	1.22551	1.17905	20.1672	14.5852	0.723214	1.30464	1.16391	76.4422	72.8021	0.952381	1.88333	1.86214	39.2635	32.5858	0.829925	1.59399	1.51303	2.33604	1.22407	Bound	Bound		X	X
488	ATP2A2	ATPase, Ca++ transporting, cardiac muscle, slow twitch 2	protein-coding gene	gene with protein product	13.2485	13.0979	0.988636	1.12217	1.1172	3.0422	3.0422	1	0.483188	0.483188	6.34858	6.31241	0.994302	0.802677	0.800195	24.1286	24.1286	1	1.38253	1.38253	39.4042	39.3587	0.998845	1.59554	1.59504	30.8345	30.8167	0.999422	1.48904	1.48879	4.85691	2.28004	Bound	Bound		X	X
533	ATP6V0B	ATPase, H+ transporting, lysosomal 21kDa, V0 subunit b	protein-coding gene	gene with protein product	26.1958	25.142	0.959772	1.41823	1.4004	14.2983	11.7125	0.81915	1.15529	1.06865	19.3535	17.1603	0.886678	1.28676	1.23452	30.971	28.27	0.912789	1.49096	1.45133	72.6201	58.6967	0.808271	1.86106	1.76861	47.4249	40.7352	0.858942	1.67601	1.60997	2.45046	1.29305	Bound	Bound		X	X
537	ATP6AP1	ATPase, H+ transporting, lysosomal accessory protein 1	protein-coding gene	gene with protein product	5.72094	2.7601	0.482456	0.757467	0.440925	6.08441	4.10698	0.675001	0.784218	0.613523	5.89988	3.36685	0.570664	0.770843	0.527224	3.24115	3.24115	1	0.510699	0.510699	N/A	N/A	N/A	N/A	N/A	N/A	N/A	N/A	N/A	N/A	N/A	N/A	Bound		X	X			X
682	BSG	basigin (Ok blood group)	protein-coding gene	gene with protein product	32.9706	23.0343	0.698631	1.51813	1.36237	28.0897	13.335	0.474728	1.44855	1.12499	30.4325	17.526	0.575899	1.48334	1.24368	34.3922	30.7009	0.89267	1.53646	1.48715	73.5969	48.4513	0.658334	1.86686	1.68531	50.3106	38.5681	0.766599	1.70166	1.58623	1.65319	0.725252	Bound	Bound	X	X			X
811	CALR	calreticulin	protein-coding gene	gene with protein product	46.3697	38.403	0.828193	1.66623	1.58437	26.6193	20.2307	0.76	1.4252	1.30601	35.133	27.8733	0.793364	1.54572	1.44519	38.8938	29.8906	0.768518	1.58988	1.47553	110.235	47.8826	0.43437	2.04232	1.68018	65.4785	37.8317	0.577773	1.8161	1.57786	1.86373	0.898195	Bound	Bound	X			X
813	CALU	calumenin	protein-coding gene	gene with protein product	11.1408	8.12975	0.72973	1.04692	0.910077	5.78019	5.78019	1	0.761942	0.761942	8.0247	6.85503	0.854242	0.904429	0.83601	12.2444	12.2444	1	1.08794	1.08794	33.0036	20.8396	0.631434	1.51856	1.31889	20.1024	15.974	0.794628	1.30325	1.20341	2.50507	1.32485	Bound	Bound	X			X
821	CANX	calnexin	protein-coding gene	gene with protein product	3.31212	3.31212	1	0.520106	0.520106	18.4358	12.9598	0.70297	1.26566	1.1126	7.81418	6.55167	0.838433	0.892884	0.816352	11.164	7.92281	0.709677	1.04782	0.898879	89.1826	70.8911	0.794898	1.95028	1.85059	31.5536	23.6993	0.75108	1.49905	1.37474	4.03799	2.01364	Bound	Bound	X	X			X
900	CCNG1	cyclin G1	protein-coding gene	gene with protein product	N/A	N/A	N/A	N/A	N/A	N/A	N/A	N/A	N/A	N/A	N/A	N/A	N/A	N/A	N/A	3.24115	3.24115	1	0.510699	0.510699	9.82829	9.73729	0.990741	0.992478	0.988438	5.64402	5.61783	0.99536	0.751589	0.749569	N/A	N/A		Bound
961	CD47	CD47 molecule	protein-coding gene	gene with protein product	N/A	N/A	N/A	N/A	N/A	N/A	N/A	N/A	N/A	N/A	N/A	N/A	N/A	N/A	N/A	8.64307	8.46301	0.979167	0.936668	0.927525	6.55219	6.55219	1	0.816386	0.816386	7.52536	7.44656	0.989529	0.876527	0.871956	N/A	N/A		Bound	X	X	X
967	CD63	CD63 molecule	protein-coding gene	gene with protein product	3.01102	3.01102	1	0.478714	0.478714	N/A	N/A	N/A	N/A	N/A	N/A	N/A	N/A	N/A	N/A	10.8038	7.92281	0.733333	1.03358	0.898879	30.5769	21.5676	0.705356	1.48539	1.3338	18.1755	13.072	0.719209	1.25949	1.11634	N/A	N/A		Bound		X	X
975	CD81	CD81 molecule	protein-coding gene	gene with protein product	15.858	15.858	1	1.20025	1.20025	36.8106	26.277	0.713844	1.56597	1.41958	24.1608	20.4133	0.844893	1.38311	1.30991	N/A	N/A	N/A	N/A	N/A	89.8046	76.5712	0.852643	1.9533	1.88407	N/A	N/A	N/A	N/A	N/A	N/A	N/A	Bound			X	X
976	ADGRE5	adhesion G protein-coupled receptor E5	protein-coding gene	gene with protein product	4.21543	4.21543	1	0.624842	0.624842	3.0422	2.89009	0.95	0.483188	0.460911	3.58109	3.49041	0.974679	0.554015	0.542877	6.84243	6.84243	1	0.83521	0.83521	10.0103	9.82829	0.981818	1.00045	0.992478	8.27616	8.20057	0.990867	0.917829	0.913844	2.31107	1.20856		Bound	X	X			X
977	CD151	CD151 molecule (Raph blood group)	protein-coding gene	gene with protein product	5.72094	5.72094	1	0.757467	0.757467	N/A	N/A	N/A	N/A	N/A	N/A	N/A	N/A	N/A	N/A	4.32153	4.14147	0.958334	0.635638	0.617155	20.7487	16.9265	0.81579	1.31699	1.22857	9.46921	8.37262	0.884194	0.976314	0.922861	N/A	N/A		Bound		X	X
1000	CDH2	cadherin 2, type 1, N-cadherin (neuronal)	protein-coding gene	gene with protein product	N/A	N/A	N/A	N/A	N/A	16.4279	11.2562	0.685185	1.21558	1.05139	N/A	N/A	N/A	N/A	N/A	4.32153	4.14147	0.958334	0.635638	0.617155	22.2047	19.6565	0.885244	1.34644	1.29351	9.79582	9.02258	0.921065	0.991041	0.955331	N/A	N/A		Bound	X	X	X
1108	CHD4	chromodomain helicase DNA binding protein 4	protein-coding gene	gene with protein product	3.01102	3.01102	1	0.478714	0.478714	N/A	N/A	N/A	N/A	N/A	N/A	N/A	N/A	N/A	N/A	5.76204	5.76204	1	0.760576	0.760576	8.73626	8.69076	0.994792	0.941326	0.939058	7.09498	7.07648	0.997393	0.850951	0.849817	N/A	N/A		Bound
1213	CLTC	clathrin, heavy chain (Hc)	protein-coding gene	gene with protein product	6.32314	3.01102	0.476191	0.800933	0.478714	3.95487	3.95487	1	0.597132	0.597132	5.00072	3.45082	0.690066	0.699033	0.537923	5.40192	5.40192	1	0.732548	0.732548	14.0144	14.0144	1	1.14658	1.14658	8.70085	8.70085	1	0.939562	0.939562	1.73992	0.79902	Bound
1312	COMT	catechol-O-methyltransferase	protein-coding gene	gene with protein product	8.12975	8.12975	1	0.910077	0.910077	21.5997	18.5574	0.859151	1.33445	1.26852	13.2514	12.2828	0.926904	1.12226	1.0893	6.4823	6.4823	1	0.811729	0.811729	39.3132	30.6679	0.780091	1.59454	1.48668	15.9637	14.0996	0.883228	1.20313	1.14921	1.20468	0.268648	Bound	Bound		X	X
1400	CRMP1	collapsin response mediator protein 1	protein-coding gene	gene with protein product	N/A	N/A	N/A	N/A	N/A	N/A	N/A	N/A	N/A	N/A	N/A	N/A	N/A	N/A	N/A	4.32153	2.16077	0.500001	0.635638	0.334609	7.00721	6.96171	0.993507	0.845545	0.842716	5.5029	3.87849	0.704808	0.740591	0.588662	N/A	N/A		Bound
1453	CSNK1D	casein kinase 1, delta	protein-coding gene	gene with protein product	3.31212	3.31212	1	0.520106	0.520106	3.65065	1.82532	0.499999	0.56237	0.261339	3.47727	2.4588	0.707106	0.541238	0.390723	3.24115	3.24115	1	0.510699	0.510699	20.4756	17.0175	0.831111	1.31124	1.2309	8.14644	7.42673	0.911653	0.910968	0.870798	2.34277	1.22822		Bound
1460	CSNK2B	casein kinase 2, beta polypeptide	protein-coding gene	gene with protein product	N/A	N/A	N/A	N/A	N/A	3.0422	3.0422	1	0.483188	0.483188	N/A	N/A	N/A	N/A	N/A	3.60128	3.42121	0.949998	0.556457	0.53418	10.9203	5.09615	0.466668	1.03823	0.707242	6.27113	4.17552	0.665833	0.797346	0.620711	N/A	N/A		Bound	X
1488	CTBP2	C-terminal binding protein 2	protein-coding gene	gene with protein product	N/A	N/A	N/A	N/A	N/A	N/A	N/A	N/A	N/A	N/A	N/A	N/A	N/A	N/A	N/A	8.64307	8.64307	1	0.936668	0.936668	3.2761	1.63805	0.5	0.515357	0.214327	5.32124	3.76268	0.707107	0.726013	0.575498	N/A	N/A		Bound
1509	CTSD	cathepsin D	protein-coding gene	gene with protein product	6.62424	6.62424	1	0.821136	0.821136	N/A	N/A	N/A	N/A	N/A	N/A	N/A	N/A	N/A	N/A	4.68166	4.5016	0.961539	0.6704	0.653367	32.033	19.8386	0.619317	1.5056	1.29751	12.2461	9.45015	0.771685	1.088	0.975439	N/A	N/A		Bound	X			X
1535	CYBA	cytochrome b-245, alpha polypeptide	protein-coding gene	gene with protein product	5.72094	3.81396	0.666667	0.757467	0.581376	5.78019	5.78019	1	0.761942	0.761942	5.75049	4.69525	0.816497	0.759705	0.671659	3.60128	3.42121	0.949998	0.556457	0.53418	14.6514	14.3633	0.980336	1.16588	1.15725	7.26387	7.00998	0.965048	0.861168	0.845717	1.26317	0.337054	Bound	Bound			X
1595	CYP51A1	cytochrome P450, family 51, subfamily A, polypeptide 1	protein-coding gene	gene with protein product	N/A	N/A	N/A	N/A	N/A	5.9323	5.47597	0.923077	0.773223	0.738461	N/A	N/A	N/A	N/A	N/A	4.68166	2.52089	0.538461	0.6704	0.401554	17.8365	17.6545	0.989796	1.25131	1.24686	9.13808	6.67121	0.730045	0.960855	0.824205	N/A	N/A		Bound		X	X
1650	DDOST	dolichyl-diphosphooligosaccharide--protein glycosyltransferase subunit (non-catalytic)	protein-coding gene	gene with protein product	43.6598	34.9278	0.799998	1.64008	1.54317	22.056	17.4927	0.793104	1.34353	1.24286	31.0316	24.718	0.796544	1.4918	1.39301	33.3718	26.2893	0.78777	1.52338	1.41978	128.223	70.3298	0.548497	2.10797	1.84714	65.4143	42.9991	0.657335	1.81567	1.63346	2.10799	1.07587	Bound	Bound	X	X
1665	DHX15	DEAH (Asp-Glu-Ala-His) box helicase 15	protein-coding gene	gene with protein product	26.497	25.8446	0.975378	1.4232	1.41237	6.99707	6.99707	1	0.844916	0.844916	13.6162	13.4475	0.987612	1.13406	1.12864	6.84243	6.84243	1	0.83521	0.83521	N/A	N/A	N/A	N/A	N/A	N/A	N/A	N/A	N/A	N/A	N/A	N/A	Bound
1690	COCH	cochlin	protein-coding gene	gene with protein product	7.82865	6.02204	0.769231	0.893687	0.779744	3.65065	3.65065	1	0.56237	0.56237	5.34599	4.68875	0.877058	0.728029	0.671057	N/A	N/A	N/A	N/A	N/A	N/A	N/A	N/A	N/A	N/A	N/A	N/A	N/A	N/A	N/A	N/A	N/A	Bound		X	X		X
1717	DHCR7	7-dehydrocholesterol reductase	protein-coding gene	gene with protein product	N/A	N/A	N/A	N/A	N/A	9.43084	7.4534	0.790322	0.97455	0.872354	N/A	N/A	N/A	N/A	N/A	3.60128	3.60128	1	0.556457	0.556457	36.2191	20.961	0.578726	1.55894	1.32141	11.4208	8.68828	0.760741	1.0577	0.938934	N/A	N/A		Bound		X	X
1718	DHCR24	24-dehydrocholesterol reductase	protein-coding gene	gene with protein product	14.754	14.6034	0.989796	1.16891	1.16446	6.0844	4.86752	0.8	0.784218	0.687308	9.47466	8.43105	0.889852	0.976564	0.925881	23.4083	23.2282	0.992307	1.36937	1.36602	19.1106	14.0144	0.733332	1.28127	1.14657	21.1506	18.0424	0.853047	1.32532	1.2563	2.23233	1.15855	Bound	Bound	X	X	X
1729	DIAPH1	diaphanous-related formin 1	protein-coding gene	gene with protein product	N/A	N/A	N/A	N/A	N/A	10.3435	9.58294	0.92647	1.01467	0.981499	N/A	N/A	N/A	N/A	N/A	5.04179	3.78134	0.75	0.702585	0.577646	20.7486	17.9275	0.864035	1.31699	1.25352	10.2279	8.23347	0.805001	1.00979	0.915583	N/A	N/A		Bound
1777	DNASE2	deoxyribonuclease II, lysosomal	protein-coding gene	gene with protein product	11.1408	11.1408	1	1.04692	1.04692	9.12662	7.3013	0.8	0.96031	0.8634	10.0835	9.01899	0.894427	1.00361	0.955158	N/A	N/A	N/A	N/A	N/A	5.09615	5.09615	1	0.707242	0.707242	N/A	N/A	N/A	N/A	N/A	N/A	N/A	Bound		X			X
1938	EEF2	eukaryotic translation elongation factor 2	protein-coding gene	gene with protein product	13.8507	11.8433	0.855073	1.14147	1.07347	9.43083	7.30129	0.774194	0.97455	0.8634	11.4291	9.29901	0.813629	1.05801	0.968437	21.2475	20.7073	0.974576	1.32731	1.31612	25.7538	13.5139	0.524734	1.41084	1.13078	23.3924	16.7283	0.715118	1.36907	1.22345	2.04675	1.03333	Bound	Bound
1978	EIF4EBP1	eukaryotic translation initiation factor 4E binding protein 1	protein-coding gene	gene with protein product	N/A	N/A	N/A	N/A	N/A	N/A	N/A	N/A	N/A	N/A	N/A	N/A	N/A	N/A	N/A	4.32153	4.32153	1	0.635638	0.635638	9.46428	3.5491	0.374999	0.976088	0.550118	6.39532	3.91632	0.612372	0.805863	0.592878	N/A	N/A		Bound
2030	SLC29A1	solute carrier family 29 (equilibrative nucleoside transporter), member 1	protein-coding gene	gene with protein product	18.8189	11.8935	0.632	1.27459	1.07531	5.62808	4.10698	0.72973	0.75036	0.613523	10.2915	6.98902	0.679109	1.01248	0.844416	N/A	N/A	N/A	N/A	N/A	12.801	9.67662	0.755925	1.10725	0.985724	N/A	N/A	N/A	N/A	N/A	N/A	N/A	Bound			X	X
2033	EP300	E1A binding protein p300	protein-coding gene	gene with protein product	N/A	N/A	N/A	N/A	N/A	N/A	N/A	N/A	N/A	N/A	N/A	N/A	N/A	N/A	N/A	4.68166	4.68166	1	0.6704	0.6704	10.1923	10.1013	0.991072	1.00827	1.00438	6.90774	6.87683	0.995526	0.839336	0.837389	N/A	N/A		Bound
2081	ERN1	endoplasmic reticulum to nucleus signaling 1	protein-coding gene	gene with protein product	235.13	127.742	0.543283	2.37131	2.10634	141.27	91.9861	0.651137	2.15005	1.96372	182.255	108.4	0.59477	2.26068	2.03503	90.2721	55.3396	0.613031	1.95555	1.74304	289.419	205.803	0.711089	2.46153	2.31345	161.637	106.719	0.660242	2.20854	2.02824	0.886872	-0.173203	Bound	Bound	X	X			X
2091	FBL	fibrillarin	protein-coding gene	gene with protein product	N/A	N/A	N/A	N/A	N/A	N/A	N/A	N/A	N/A	N/A	N/A	N/A	N/A	N/A	N/A	5.04179	5.04179	1	0.702585	0.702585	6.27919	6.23368	0.992752	0.797904	0.794745	5.62658	5.60615	0.99637	0.750244	0.748665	N/A	N/A		Bound
2137	EXTL3	exostosin-like glycosyltransferase 3	protein-coding gene	gene with protein product	9.63526	7.82865	0.8125	0.983863	0.893687	10.3435	10.0393	0.970588	1.01467	1.0017	9.98311	8.86533	0.888033	0.999266	0.947695	3.24115	3.24115	1	0.510699	0.510699	10.7383	10.5563	0.98305	1.03094	1.02351	5.89953	5.84932	0.991489	0.770818	0.767106	0.590952	-0.758888	Bound	Bound		X	X
2194	FASN	fatty acid synthase	protein-coding gene	gene with protein product	N/A	N/A	N/A	N/A	N/A	14.2984	13.4871	0.943262	1.15529	1.12992	N/A	N/A	N/A	N/A	N/A	9.00319	9.00319	1	0.954396	0.954396	26.2088	23.3877	0.892361	1.41845	1.36899	15.3611	14.5108	0.944649	1.18642	1.16169	N/A	N/A		Bound
2316	FLNA	filamin A, alpha	protein-coding gene	gene with protein product	9.03306	4.21543	0.466667	0.955835	0.624842	20.3828	13.5378	0.664179	1.30926	1.13155	13.569	7.55432	0.556732	1.13255	0.878195	N/A	N/A	N/A	N/A	N/A	10.162	7.67456	0.755224	1.00698	0.885053	N/A	N/A	N/A	N/A	N/A	N/A	N/A	Bound			X
2335	FN1	fibronectin 1	protein-coding gene	gene with protein product	N/A	N/A	N/A	N/A	N/A	N/A	N/A	N/A	N/A	N/A	N/A	N/A	N/A	N/A	N/A	3.60128	3.60128	1	0.556457	0.556457	17.2905	17.1085	0.989474	1.23781	1.23321	7.89101	7.84937	0.994723	0.897132	0.894835	N/A	N/A		Bound	X			X
2512	FTL	ferritin, light polypeptide	protein-coding gene	gene with protein product	N/A	N/A	N/A	N/A	N/A	N/A	N/A	N/A	N/A	N/A	N/A	N/A	N/A	N/A	N/A	9.72345	9.72345	1	0.98782	0.98782	13.9234	13.6504	0.980392	1.14375	1.13515	11.6354	11.5208	0.990147	1.06578	1.06148	N/A	N/A		Bound		X
2535	FZD2	frizzled class receptor 2	protein-coding gene	gene with protein product	3.16157	3.08629	0.976189	0.499903	0.489437	6.69285	5.32385	0.795453	0.825611	0.726226	4.59999	4.05351	0.8812	0.662757	0.607831	4.32153	4.14147	0.958334	0.635638	0.617155	13.1044	13.1044	1	1.11742	1.11742	7.52536	7.36692	0.978945	0.876527	0.867286	1.63595	0.710129		Bound	X	X	X
2657	GDF1	growth differentiation factor 1	protein-coding gene	gene with protein product	N/A	N/A	N/A	N/A	N/A	N/A	N/A	N/A	N/A	N/A	N/A	N/A	N/A	N/A	N/A	3.24115	3.24115	1	0.510699	0.510699	15.4704	6.55219	0.42353	1.1895	0.816386	7.0811	4.60832	0.650792	0.850101	0.663543	N/A	N/A		Bound	X	X		X
2683	B4GALT1	UDP-Gal:betaGlcNAc beta 1,4- galactosyltransferase, polypeptide 1	protein-coding gene	gene with protein product	7.82865	7.82865	1	0.893687	0.893687	N/A	N/A	N/A	N/A	N/A	N/A	N/A	N/A	N/A	N/A	12.2444	12.0643	0.985294	1.08794	1.0815	20.0206	20.0206	1	1.30148	1.30148	15.6569	15.5414	0.99262	1.19471	1.19149	N/A	N/A		Bound		X	X
2700	GJA3	gap junction protein, alpha 3, 46kDa	protein-coding gene	gene with protein product	N/A	N/A	N/A	N/A	N/A	N/A	N/A	N/A	N/A	N/A	N/A	N/A	N/A	N/A	N/A	7.20256	5.58199	0.775001	0.857487	0.746789	6.7706	6.7524	0.997312	0.830627	0.829458	6.98324	6.13937	0.879157	0.844057	0.788124	N/A	N/A		Bound		X	X
2850	GPR27	G protein-coupled receptor 27	protein-coding gene	gene with protein product	N/A	N/A	N/A	N/A	N/A	N/A	N/A	N/A	N/A	N/A	N/A	N/A	N/A	N/A	N/A	9.72345	9.72345	1	0.98782	0.98782	16.699	16.4487	0.985013	1.22269	1.21613	12.7425	12.6467	0.992478	1.10526	1.10198	N/A	N/A		Bound		X	X
2885	GRB2	growth factor receptor-bound protein 2	protein-coding gene	gene with protein product	N/A	N/A	N/A	N/A	N/A	4.56331	4.56331	1	0.65928	0.65928	N/A	N/A	N/A	N/A	N/A	7.74275	7.65271	0.988371	0.888895	0.883815	6.55219	6.55219	1	0.816386	0.816386	7.12264	7.0811	0.994169	0.852641	0.850101	N/A	N/A		Bound		X
2907	GRINA	glutamate receptor, ionotropic, N-methyl D-aspartate-associated protein 1 (glutamate binding)	protein-coding gene	gene with protein product	N/A	N/A	N/A	N/A	N/A	3.0422	3.0422	1	0.483188	0.483188	N/A	N/A	N/A	N/A	N/A	3.24115	3.24115	1	0.510699	0.510699	20.2633	18.4735	0.911677	1.30671	1.26655	8.10409	7.73793	0.954818	0.908704	0.888625	N/A	N/A		Bound		X	X
2923	PDIA3	protein disulfide isomerase family A, member 3	protein-coding gene	gene with protein product	9.08324	8.2803	0.911602	0.958241	0.918046	4.4112	3.49854	0.793104	0.644557	0.543887	6.32993	5.38228	0.850291	0.801399	0.730966	3.96141	1.80064	0.454545	0.59785	0.255427	41.3456	32.2756	0.780631	1.61643	1.50887	12.7979	7.62344	0.595678	1.10714	0.882151	2.02181	1.01565	Bound	Bound	X			X
3119	HLA-DQB1	major histocompatibility complex, class II, DQ beta 1	protein-coding gene	gene with protein product	N/A	N/A	N/A	N/A	N/A	N/A	N/A	N/A	N/A	N/A	N/A	N/A	N/A	N/A	N/A	4.68166	2.34083	0.5	0.6704	0.36937	6.55219	6.55219	1	0.816386	0.816386	5.53851	3.91632	0.707107	0.743393	0.592878	N/A	N/A		Bound	X	X			X
3181	HNRNPA2B1	heterogeneous nuclear ribonucleoprotein A2/B1	protein-coding gene	gene with protein product	4.21543	4.21543	1	0.624842	0.624842	N/A	N/A	N/A	N/A	N/A	N/A	N/A	N/A	N/A	N/A	3.96141	3.96141	1	0.59785	0.59785	12.1944	6.55219	0.537311	1.08616	0.816386	6.95033	5.09469	0.733015	0.842005	0.707118	N/A	N/A		Bound
3309	HSPA5	heat shock 70kDa protein 5 (glucose-regulated protein, 78kDa)	protein-coding gene	gene with protein product	133.137	72.1992	0.542292	2.1243	1.85853	28.901	20.5349	0.710527	1.46091	1.31249	62.0306	38.5046	0.620736	1.79261	1.58551	191.228	83.0695	0.4344	2.28155	1.91944	130.559	100.186	0.767367	2.11581	2.00081	158.008	91.2273	0.57736	2.19868	1.96013	2.54725	1.34894	Bound	Bound	X			X
3340	NDST1	N-deacetylase/N-sulfotransferase (heparan glucosaminyl) 1	protein-coding gene	gene with protein product	11.1408	10.8397	0.972972	1.04692	1.03502	3.95487	3.95487	1	0.597132	0.597132	6.63779	6.54748	0.986394	0.822024	0.816074	3.24115	3.24115	1	0.510699	0.510699	10.5563	10.5563	1	1.02351	1.02351	5.84933	5.84933	1	0.767106	0.767106	0.881216	-0.182433	Bound			X	X
3480	IGF1R	insulin-like growth factor 1 receptor	protein-coding gene	gene with protein product	N/A	N/A	N/A	N/A	N/A	3.34643	3.34643	1	0.524582	0.524582	N/A	N/A	N/A	N/A	N/A	3.60128	3.60128	1	0.556457	0.556457	15.2884	15.1974	0.994047	1.18436	1.18177	7.42011	7.39799	0.997019	0.87041	0.869114	N/A	N/A		Bound	X	X	X
3643	INSR	insulin receptor	protein-coding gene	gene with protein product	8.43085	8.2803	0.982143	0.925871	0.918046	3.65065	3.65065	1	0.56237	0.56237	5.5478	5.49804	0.991031	0.744121	0.740208	6.84243	3.60128	0.526316	0.83521	0.556457	17.2905	17.2905	1	1.23781	1.23781	10.877	7.89101	0.725476	1.03651	0.897132	1.9606	0.971293	Bound	Bound	X	X	X
3654	IRAK1	interleukin-1 receptor-associated kinase 1	protein-coding gene	gene with protein product	8.12975	7.9792	0.981482	0.910077	0.901959	11.5604	8.36607	0.723685	1.06297	0.922521	9.69448	8.17035	0.842783	0.986525	0.91224	N/A	N/A	N/A	N/A	N/A	11.6483	11.6483	1	1.06626	1.06626	N/A	N/A	N/A	N/A	N/A	N/A	N/A	Bound			X
3703	STT3A	STT3A, subunit of the oligosaccharyltransferase complex (catalytic)	protein-coding gene	gene with protein product	45.1652	36.5839	0.810002	1.6548	1.56329	32.3995	4.10697	0.12676	1.51054	0.613522	38.2535	12.2576	0.320431	1.58267	1.08841	34.2122	26.0492	0.761402	1.53418	1.41579	87.1805	64.7635	0.742867	1.94042	1.81133	54.6135	41.0736	0.752077	1.7373	1.61356	1.42767	0.513665	Bound	Bound		X	X
3775	KCNK1	potassium channel, two pore domain subfamily K, member 1	protein-coding gene	gene with protein product	N/A	N/A	N/A	N/A	N/A	N/A	N/A	N/A	N/A	N/A	N/A	N/A	N/A	N/A	N/A	5.76204	4.86173	0.843752	0.760576	0.686791	23.2967	20.5666	0.882812	1.36729	1.31316	11.586	9.99946	0.863061	1.06394	0.999977	N/A	N/A		Bound		X	X
3915	LAMC1	laminin, gamma 1 (formerly LAMB2)	protein-coding gene	gene with protein product	4.51653	2.25826	0.499999	0.654805	0.353774	45.3288	44.8725	0.989934	1.65637	1.65198	14.3084	10.0665	0.703538	1.15559	1.00288	N/A	N/A	N/A	N/A	N/A	10.4653	2.59357	0.247825	1.01975	0.413898	N/A	N/A	N/A	N/A	N/A	N/A	N/A	Bound		X			X
3920	LAMP2	lysosomal-associated membrane protein 2	protein-coding gene	gene with protein product	N/A	N/A	N/A	N/A	N/A	4.86753	3.34643	0.687501	0.687309	0.524582	N/A	N/A	N/A	N/A	N/A	5.58198	3.24115	0.580645	0.746788	0.510699	18.3825	18.3825	1	1.26441	1.26441	10.1297	7.71885	0.762001	1.0056	0.887552	N/A	N/A		Bound	X	X	X
3930	LBR	lamin B receptor	protein-coding gene	gene with protein product	15.0551	10.0869	0.669998	1.17768	1.00376	6.69285	6.69285	1	0.825611	0.825611	10.038	8.21646	0.818534	1.00165	0.914685	38.7138	27.9099	0.720929	1.58787	1.44576	14.1054	11.1478	0.790321	1.14939	1.04719	23.3682	17.639	0.754828	1.36863	1.24647	2.32797	1.21907	Bound	Bound		X	X
3959	LGALS3BP	lectin, galactoside-binding, soluble, 3 binding protein	protein-coding gene	gene with protein product	26.1959	26.1959	1	1.41823	1.41823	N/A	N/A	N/A	N/A	N/A	N/A	N/A	N/A	N/A	N/A	16.2057	16.0257	0.988889	1.20967	1.20482	44.9553	37.1291	0.825911	1.65278	1.56971	26.9914	24.393	0.903733	1.43123	1.38727	N/A	N/A		Bound	X			X
3998	LMAN1	lectin, mannose-binding, 1	protein-coding gene	gene with protein product	3.31212	2.40882	0.727274	0.520106	0.381804	3.65065	3.65065	1	0.56237	0.56237	3.47727	2.96543	0.852804	0.541238	0.472087	9.72345	6.96247	0.716049	0.98782	0.842763	5.64217	5.64217	1	0.751446	0.751446	7.40685	6.26765	0.846197	0.869633	0.797105	2.13008	1.09091		Bound	X	X	X
4010	LMX1B	LIM homeobox transcription factor 1, beta	protein-coding gene	gene with protein product	N/A	N/A	N/A	N/A	N/A	N/A	N/A	N/A	N/A	N/A	N/A	N/A	N/A	N/A	N/A	3.24115	3.24115	1	0.510699	0.510699	10.1923	10.1013	0.991072	1.00827	1.00438	5.74759	5.72187	0.995526	0.759486	0.757538	N/A	N/A		Bound
4012	LNPEP	leucyl/cystinyl aminopeptidase	protein-coding gene	gene with protein product	6.02204	6.02204	1	0.779744	0.779744	4.25909	3.95487	0.928572	0.629317	0.597132	5.06443	4.8802	0.963624	0.70453	0.688438	N/A	N/A	N/A	N/A	N/A	5.55116	5.50566	0.991804	0.744384	0.740809	N/A	N/A	N/A	N/A	N/A	N/A	N/A	Bound			X	X
4131	MAP1B	microtubule-associated protein 1B	protein-coding gene	gene with protein product	N/A	N/A	N/A	N/A	N/A	3.0422	3.0422	1	0.483188	0.483188	N/A	N/A	N/A	N/A	N/A	9.36332	9.00319	0.961538	0.97143	0.954396	31.123	30.9409	0.994149	1.49308	1.49053	17.0709	16.6903	0.977708	1.23226	1.22246	N/A	N/A		Bound
4176	MCM7	minichromosome maintenance complex component 7	protein-coding gene	gene with protein product	N/A	N/A	N/A	N/A	N/A	3.95487	3.65065	0.923077	0.597132	0.56237	N/A	N/A	N/A	N/A	N/A	8.463	8.37297	0.989362	0.927524	0.92288	57.0587	40.2687	0.705741	1.75632	1.60497	21.9747	18.3621	0.835603	1.34192	1.26392	N/A	N/A		Bound
4192	MDK	midkine (neurite growth-promoting factor 2)	protein-coding gene	gene with protein product	N/A	N/A	N/A	N/A	N/A	6.08441	4.4112	0.725	0.784218	0.644557	N/A	N/A	N/A	N/A	N/A	9.36332	9.36332	1	0.97143	0.97143	11.4663	6.37019	0.555558	1.05942	0.804152	10.3616	7.72309	0.745357	1.01543	0.887791	N/A	N/A		Bound	X			X
4245	MGAT1	mannosyl (alpha-1,3-)-glycoprotein beta-1,2-N-acetylglucosaminyltransferase	protein-coding gene	gene with protein product	9.03306	8.88251	0.983333	0.955835	0.948536	3.0422	3.0422	1	0.483188	0.483188	5.24217	5.1983	0.991632	0.719511	0.715862	N/A	N/A	N/A	N/A	N/A	6.00618	5.91517	0.984847	0.778598	0.771967	N/A	N/A	N/A	N/A	N/A	N/A	N/A	Bound			X	X
4247	MGAT2	mannosyl (alpha-1,6-)-glycoprotein beta-1,2-N-acetylglucosaminyltransferase	protein-coding gene	gene with protein product	8.73195	6.77479	0.775862	0.941111	0.830896	27.3798	15.2617	0.557407	1.43743	1.1836	15.4622	10.1683	0.657625	1.18927	1.00725	57.8005	42.7652	0.739875	1.76193	1.63109	86.3919	55.2563	0.639601	1.93647	1.74238	70.6647	48.6112	0.687913	1.8492	1.68674	4.57016	2.19225	Bound	Bound		X		X
4691	NCL	nucleolin	protein-coding gene	gene with protein product	5.11873	1.20441	0.235295	0.709162	0.0807744	3.80276	3.80276	1	0.580099	0.580099	4.41195	2.14011	0.485072	0.644631	0.330437	19.4469	15.8456	0.814815	1.28885	1.19991	22.0226	17.8365	0.809918	1.34287	1.25131	20.6947	16.8116	0.812363	1.31586	1.22561	4.69061	2.22977		Bound
4733	DRG1	developmentally regulated GTP binding protein 1	protein-coding gene	gene with protein product	N/A	N/A	N/A	N/A	N/A	N/A	N/A	N/A	N/A	N/A	N/A	N/A	N/A	N/A	N/A	3.60128	3.60128	1	0.556457	0.556457	7.53502	6.27919	0.833334	0.877084	0.797904	5.2092	4.75533	0.912871	0.716771	0.67718	N/A	N/A		Bound
4779	NFE2L1	nuclear factor, erythroid 2-like 1	protein-coding gene	gene with protein product	14.4529	11.743	0.8125	1.15995	1.06978	11.8646	11.8646	1	1.07425	1.07425	13.095	11.8036	0.901388	1.1171	1.07202	22.3279	14.2851	0.639785	1.34885	1.15488	51.28	36.1963	0.705856	1.70995	1.55866	33.8375	22.7391	0.672009	1.5294	1.35677	2.58401	1.36961	Bound	Bound		X		X
4810	NHS	Nance-Horan syndrome (congenital cataracts and dental anomalies)	protein-coding gene	gene with protein product	N/A	N/A	N/A	N/A	N/A	N/A	N/A	N/A	N/A	N/A	N/A	N/A	N/A	N/A	N/A	6.84243	5.04179	0.736842	0.83521	0.702585	13.8324	13.8324	1	1.1409	1.1409	9.72868	8.35105	0.858395	0.988054	0.921741	N/A	N/A		Bound
4839	NOP2	NOP2 nucleolar protein	protein-coding gene	gene with protein product	N/A	N/A	N/A	N/A	N/A	N/A	N/A	N/A	N/A	N/A	N/A	N/A	N/A	N/A	N/A	5.76204	5.58198	0.968751	0.760576	0.746788	7.28022	7.28022	1	0.862145	0.862145	6.4768	6.3748	0.984251	0.81136	0.804466	N/A	N/A		Bound
4891	SLC11A2	solute carrier family 11 (proton-coupled divalent metal ion transporter), member 2	protein-coding gene	gene with protein product	N/A	N/A	N/A	N/A	N/A	N/A	N/A	N/A	N/A	N/A	N/A	N/A	N/A	N/A	N/A	16.2057	13.1447	0.811112	1.20967	1.11875	4.77764	4.75489	0.995238	0.679213	0.67714	8.79916	7.90578	0.898471	0.944441	0.897945	N/A	N/A		Bound		X	X
5018	OXA1L	oxidase (cytochrome c) assembly 1-like	protein-coding gene	gene with protein product	3.91432	3.91432	1	0.592656	0.592656	N/A	N/A	N/A	N/A	N/A	N/A	N/A	N/A	N/A	N/A	4.68166	4.5016	0.961539	0.6704	0.653367	5.82417	2.91209	0.500001	0.765234	0.464205	5.22176	3.62064	0.693376	0.717817	0.558786	N/A	N/A		Bound		X	X
5034	P4HB	prolyl 4-hydroxylase, beta polypeptide	protein-coding gene	gene with protein product	74.9744	56.7577	0.757027	1.87491	1.75402	23.425	20.8391	0.88961	1.36968	1.31888	41.9079	34.3916	0.820646	1.6223	1.53645	53.1189	50.0578	0.942373	1.72525	1.69947	119.759	92.2312	0.770137	2.07831	1.96488	79.7589	67.9477	0.851914	1.90178	1.83217	1.90319	0.928422	Bound	Bound	X			X
5099	PCDH7	protocadherin 7	protein-coding gene	gene with protein product	10.5386	10.5386	1	1.02278	1.02278	16.1237	10.7998	0.669811	1.20746	1.03342	13.0354	10.6684	0.81842	1.11512	1.0281	N/A	N/A	N/A	N/A	N/A	30.3039	30.1674	0.995496	1.4815	1.47954	N/A	N/A	N/A	N/A	N/A	N/A	N/A	Bound		X	X	X
5140	PDE3B	phosphodiesterase 3B, cGMP-inhibited	protein-coding gene	gene with protein product	N/A	N/A	N/A	N/A	N/A	N/A	N/A	N/A	N/A	N/A	N/A	N/A	N/A	N/A	N/A	5.40192	2.70096	0.5	0.732548	0.431518	5.64217	5.64217	1	0.751446	0.751446	5.52074	3.90375	0.707107	0.741997	0.591482	N/A	N/A		Bound		X	X
5430	POLR2A	polymerase (RNA) II (DNA directed) polypeptide A, 220kDa	protein-coding gene	gene with protein product	N/A	N/A	N/A	N/A	N/A	N/A	N/A	N/A	N/A	N/A	N/A	N/A	N/A	N/A	N/A	3.24115	3.24115	1	0.510699	0.510699	19.3836	19.3381	0.997653	1.28743	1.28641	7.92623	7.91692	0.998826	0.899066	0.898556	N/A	N/A		Bound
5479	PPIB	peptidylprolyl isomerase B (cyclophilin B)	protein-coding gene	gene with protein product	4.51653	4.51653	1	0.654805	0.654805	6.0844	6.0844	1	0.784218	0.784218	5.24217	5.24217	1	0.719511	0.719511	5.04179	5.04179	1	0.702585	0.702585	9.28227	4.36813	0.470589	0.967654	0.640296	6.841	4.69289	0.685995	0.835119	0.67144	1.30499	0.384042		Bound	X			X
5589	PRKCSH	protein kinase C substrate 80K-H	protein-coding gene	gene with protein product	7.82865	7.82865	1	0.893687	0.893687	N/A	N/A	N/A	N/A	N/A	N/A	N/A	N/A	N/A	N/A	6.12217	6.12217	1	0.786905	0.786905	10.2833	10.253	0.99705	1.01213	1.01085	7.93449	7.92278	0.998524	0.899519	0.898878	N/A	N/A		Bound	X			X
5592	PRKG1	protein kinase, cGMP-dependent, type I	protein-coding gene	gene with protein product	N/A	N/A	N/A	N/A	N/A	N/A	N/A	N/A	N/A	N/A	N/A	N/A	N/A	N/A	N/A	3.24115	3.24115	1	0.510699	0.510699	11.4663	5.73317	0.5	1.05942	0.758395	6.09624	4.31069	0.707107	0.785062	0.634547	N/A	N/A		Bound
5660	PSAP	prosaposin	protein-coding gene	gene with protein product	8.43085	3.01102	0.357143	0.925871	0.478714	6.99707	4.81682	0.688405	0.844916	0.68276	7.68058	3.80835	0.495842	0.885394	0.580737	8.64307	6.66237	0.770834	0.936668	0.823629	64.794	53.8433	0.830993	1.81153	1.73113	23.6647	18.94	0.800348	1.3741	1.27738	3.08111	1.62345	Bound	Bound	X			X
5817	PVR	poliovirus receptor	protein-coding gene	gene with protein product	3.91432	3.01102	0.769232	0.592656	0.478714	N/A	N/A	N/A	N/A	N/A	N/A	N/A	N/A	N/A	N/A	6.12217	1.44051	0.235294	0.786905	0.158516	11.9214	11.8303	0.992367	1.07633	1.073	8.5431	4.12816	0.483216	0.931615	0.615757	N/A	N/A		Bound	X	X			X
5886	RAD23A	RAD23 homolog A, nucleotide excision repair protein	protein-coding gene	gene with protein product	N/A	N/A	N/A	N/A	N/A	10.7491	6.74355	0.627359	1.03137	0.828889	N/A	N/A	N/A	N/A	N/A	20.1672	17.2861	0.857139	1.30465	1.2377	17.1085	13.1651	0.769506	1.23321	1.11942	18.575	15.0855	0.812142	1.26893	1.17856	N/A	N/A		Bound
6023	RMRP	RNA component of mitochondrial RNA processing endoribonuclease	non-coding RNA	RNA, misc	67.2962	17.8202	0.264802	1.82799	1.25091	185.118	48.688	0.26301	2.26745	1.68742	111.614	29.4555	0.263904	2.04772	1.46917	52.5786	24.2486	0.461188	1.72081	1.38469	366.771	81.9753	0.223505	2.5644	1.91368	138.868	44.5846	0.321057	2.1426	1.64918	1.24418	0.315192	Bound	Bound
6029	RN7SL1	RNA, 7SL, cytoplasmic 1	non-coding RNA	RNA, small cytoplasmic	1407.25	1159.94	0.82426	3.14837	3.06444	790.278	688.3	0.870959	2.89778	2.83778	1054.57	893.525	0.847288	3.02308	2.95111	1345.16	1081.36	0.80389	3.12877	3.03397	1743.21	1530.72	0.878104	3.24135	3.1849	1531.31	1286.57	0.840178	3.18506	3.10943	1.45207	0.538106	Bound	Bound
6046	BRD2	bromodomain containing 2	protein-coding gene	gene with protein product	N/A	N/A	N/A	N/A	N/A	N/A	N/A	N/A	N/A	N/A	N/A	N/A	N/A	N/A	N/A	5.40192	5.40192	1	0.732548	0.732548	32.8216	32.6093	0.99353	1.51616	1.51334	13.3154	13.2723	0.99676	1.12435	1.12294	N/A	N/A		Bound
6084	RNY1	RNA, Ro-associated Y1	non-coding RNA	RNA, Y	219.584	90.7421	0.413246	2.3416	1.95781	233.819	145.828	0.623679	2.36888	2.16384	226.59	115.034	0.507674	2.35524	2.06082	223.747	121.735	0.544074	2.34976	2.08542	654.913	477.099	0.728492	2.81618	2.67861	382.799	240.997	0.629566	2.58297	2.38201	1.68939	0.756503	Bound	Bound
6086	RNY4	RNA, Ro-associated Y4	non-coding RNA	RNA, Y	134.994	4.9732	0.0368402	2.13031	0.696636	57.5889	6.84496	0.118859	1.76034	0.835371	88.1712	5.8345	0.0661724	1.94533	0.766003	81.3769	17.4662	0.214633	1.9105	1.2422	140.666	54.3989	0.386724	2.14819	1.73559	106.99	30.8244	0.288104	2.02935	1.48889	1.21344	0.279103	Bound	Bound
6132	RPL8	ribosomal protein L8	protein-coding gene	gene with protein product	5.41983	5.41983	1	0.733986	0.733986	15.5153	9.73506	0.62745	1.19076	0.988339	9.17007	7.26377	0.792118	0.962373	0.861162	7.20256	7.20256	1	0.857487	0.857487	24.2977	21.0671	0.867041	1.38557	1.32361	13.229	12.3182	0.93115	1.12153	1.09055	1.44263	0.528697	Bound	Bound
6139	RPL17	ribosomal protein L17	protein-coding gene	gene with protein product	N/A	N/A	N/A	N/A	N/A	N/A	N/A	N/A	N/A	N/A	N/A	N/A	N/A	N/A	N/A	6.84243	6.84243	1	0.83521	0.83521	6.37019	6.27919	0.985715	0.804152	0.797904	6.60209	6.55476	0.992832	0.819681	0.816557	N/A	N/A		Bound
6141	RPL18	ribosomal protein L18	protein-coding gene	gene with protein product	12.0441	9.63526	0.8	1.08077	0.983863	3.0422	3.0422	1	0.483188	0.483188	6.05314	5.41409	0.894427	0.781981	0.733526	19.807	14.7652	0.745455	1.29682	1.16924	10.9203	9.28227	0.85	1.03824	0.967654	14.7071	11.707	0.796013	1.16753	1.06845	2.42967	1.28076	Bound	Bound
6175	RPLP0	ribosomal protein, large, P0	protein-coding gene	gene with protein product	N/A	N/A	N/A	N/A	N/A	N/A	N/A	N/A	N/A	N/A	N/A	N/A	N/A	N/A	N/A	5.40192	5.40192	1	0.732548	0.732548	7.46222	5.50061	0.737128	0.872868	0.740411	6.34904	5.45104	0.858561	0.802708	0.73648	N/A	N/A		Bound
6184	RPN1	ribophorin I	protein-coding gene	gene with protein product	N/A	N/A	N/A	N/A	N/A	8.51818	8.51818	1	0.930347	0.930347	N/A	N/A	N/A	N/A	N/A	9.72345	9.72345	1	0.98782	0.98782	40.5872	34.9451	0.860988	1.60839	1.54339	19.8657	18.4333	0.927894	1.2981	1.2656	N/A	N/A		Bound	X	X	X
6191	RPS4X	ribosomal protein S4, X-linked	protein-coding gene	gene with protein product	N/A	N/A	N/A	N/A	N/A	N/A	N/A	N/A	N/A	N/A	N/A	N/A	N/A	N/A	N/A	3.24115	3.24115	1	0.510699	0.510699	11.5027	11.4663	0.996836	1.0608	1.05942	6.10591	6.09624	0.998417	0.78575	0.785062	N/A	N/A		Bound
6301	SARS	seryl-tRNA synthetase	protein-coding gene	gene with protein product	7.52754	7.52754	1	0.876653	0.876653	3.34643	3.34643	1	0.524582	0.524582	5.019	5.019	1	0.700617	0.700617	4.32153	4.32153	1	0.635638	0.635638	9.82829	9.73729	0.990741	0.992478	0.988438	6.51715	6.48691	0.99536	0.814058	0.812038	1.2985	0.376841		Bound
6307	MSMO1	methylsterol monooxygenase 1	protein-coding gene	gene with protein product	N/A	N/A	N/A	N/A	N/A	N/A	N/A	N/A	N/A	N/A	N/A	N/A	N/A	N/A	N/A	4.32153	2.16077	0.500001	0.635638	0.334609	26.9368	21.4767	0.797299	1.43035	1.33197	10.7893	6.81221	0.631388	1.03299	0.833288	N/A	N/A		Bound		X	X
6319	SCD	stearoyl-CoA desaturase (delta-9-desaturase)	protein-coding gene	gene with protein product	31.6157	23.4859	0.742856	1.4999	1.37081	11.2561	11.2561	1	1.05139	1.05139	18.8646	16.2592	0.861891	1.27565	1.2111	7.56268	7.56268	1	0.878676	0.878676	64.6119	54.5107	0.843663	1.81031	1.73648	22.1052	20.3039	0.918511	1.34449	1.30758	1.17178	0.228706	Bound	Bound		X	X
6382	SDC1	syndecan 1	protein-coding gene	gene with protein product	N/A	N/A	N/A	N/A	N/A	N/A	N/A	N/A	N/A	N/A	N/A	N/A	N/A	N/A	N/A	5.04179	5.04179	1	0.702585	0.702585	11.1023	5.27816	0.475411	1.04541	0.722483	7.48168	5.15862	0.689501	0.873999	0.712534	N/A	N/A		Bound	X	X			X
6497	SKI	SKI proto-oncogene	protein-coding gene	gene with protein product	6.02204	6.02204	1	0.779744	0.779744	6.54074	6.46469	0.988373	0.815627	0.810548	6.27603	6.23944	0.994169	0.797685	0.795146	8.28294	8.28294	1	0.918185	0.918185	5.09615	2.54808	0.500001	0.707242	0.406213	6.49701	4.59408	0.707107	0.812713	0.662199	1.03521	0.0499223	Bound	Bound
6510	SLC1A5	solute carrier family 1 (neutral amino acid transporter), member 5	protein-coding gene	gene with protein product	59.2418	42.5307	0.717916	1.77263	1.6287	77.779	48.7766	0.627118	1.89086	1.68821	67.8806	45.5467	0.670983	1.83175	1.65846	57.2603	50.868	0.888365	1.75785	1.70645	245.161	189.164	0.771591	2.38945	2.27684	118.482	98.0939	0.827922	2.07365	1.99164	1.74545	0.803598	Bound	Bound		X	X
6513	SLC2A1	solute carrier family 2 (facilitated glucose transporter), member 1	protein-coding gene	gene with protein product	N/A	N/A	N/A	N/A	N/A	3.34643	3.34643	1	0.524582	0.524582	N/A	N/A	N/A	N/A	N/A	5.04179	5.04179	1	0.702585	0.702585	18.428	16.517	0.896296	1.26548	1.21793	9.639	9.12552	0.946729	0.984032	0.960258	N/A	N/A		Bound		X	X
6520	SLC3A2	solute carrier family 3 (amino acid transporter heavy chain), member 2	protein-coding gene	gene with protein product	37.6377	29.508	0.784001	1.57562	1.46994	19.2166	9.0759	0.472295	1.28368	0.95789	26.8936	16.3649	0.608506	1.42965	1.21391	41.4147	37.7534	0.911594	1.61715	1.57696	157.146	114.066	0.725857	2.1963	2.05716	80.6733	65.623	0.813442	1.90673	1.81706	2.99972	1.58483	Bound	Bound		X	X
6535	SLC6A8	solute carrier family 6 (neurotransmitter transporter), member 8	protein-coding gene	gene with protein product	N/A	N/A	N/A	N/A	N/A	N/A	N/A	N/A	N/A	N/A	N/A	N/A	N/A	N/A	N/A	8.64307	8.64307	1	0.936668	0.936668	27.3918	27.1643	0.991695	1.43762	1.434	15.3867	15.3226	0.995839	1.18714	1.18533	N/A	N/A		Bound		X	X
6536	SLC6A9	solute carrier family 6 (neurotransmitter transporter, glycine), member 9	protein-coding gene	gene with protein product	7.52755	6.32314	0.84	0.876654	0.800933	11.2562	11.2562	1	1.05139	1.05139	9.20496	8.43648	0.916515	0.964022	0.926162	15.3054	15.1254	0.988236	1.18485	1.17971	46.5933	43.3173	0.929689	1.66832	1.63666	26.7045	25.5967	0.958515	1.42658	1.40818	2.9011	1.5366	Bound	Bound		X			X
6541	SLC7A1	solute carrier family 7 (cationic amino acid transporter, y+ system), member 1	protein-coding gene	gene with protein product	28.2283	23.5612	0.834666	1.45068	1.3722	37.4191	31.9431	0.853659	1.57309	1.50438	32.5004	27.4339	0.844109	1.51189	1.43829	24.4887	22.8681	0.933824	1.38897	1.35923	223.411	146.742	0.656823	2.34911	2.16655	73.9666	57.9285	0.783171	1.86904	1.76289	2.27586	1.18641	Bound	Bound		X	X
6548	SLC9A1	solute carrier family 9, subfamily A (NHE1, cation proton antiporter 1), member 1	protein-coding gene	gene with protein product	5.11873	5.11873	1	0.709162	0.709162	12.473	12.3209	0.987805	1.09597	1.09064	7.99037	7.9415	0.993884	0.902567	0.899903	35.6526	34.9324	0.9798	1.55209	1.54323	38.9491	26.7093	0.685749	1.5905	1.42666	37.2644	30.5454	0.819693	1.57129	1.48495	4.66366	2.22146	Bound	Bound		X	X
6566	SLC16A1	solute carrier family 16 (monocarboxylate transporter), member 1	protein-coding gene	gene with protein product	9.63526	6.62424	0.6875	0.983863	0.821136	4.25909	4.25909	1	0.629317	0.629317	6.40605	5.31161	0.829156	0.80659	0.725226	N/A	N/A	N/A	N/A	N/A	42.7712	31.5779	0.738298	1.63115	1.49938	N/A	N/A	N/A	N/A	N/A	N/A	N/A	Bound			X	X
6573	SLC19A1	solute carrier family 19 (folate transporter), member 1	protein-coding gene	gene with protein product	18.9694	15.8079	0.833332	1.27805	1.19887	N/A	N/A	N/A	N/A	N/A	N/A	N/A	N/A	N/A	N/A	11.8842	4.86173	0.409091	1.07497	0.686791	17.6545	17.5635	0.994845	1.24686	1.24461	14.4848	9.24062	0.637952	1.16091	0.965701	N/A	N/A		Bound		X	X
6575	SLC20A2	solute carrier family 20 (phosphate transporter), member 2	protein-coding gene	gene with protein product	N/A	N/A	N/A	N/A	N/A	N/A	N/A	N/A	N/A	N/A	N/A	N/A	N/A	N/A	N/A	5.76204	4.44158	0.770835	0.760576	0.647537	5.46016	5.46016	1	0.737205	0.737205	5.60907	4.92461	0.877972	0.748891	0.692371	N/A	N/A		Bound		X	X
6650	CAPN15	calpain 15	protein-coding gene	gene with protein product	3.01102	3.01102	1	0.478714	0.478714	N/A	N/A	N/A	N/A	N/A	N/A	N/A	N/A	N/A	N/A	9.72345	9.72345	1	0.98782	0.98782	14.0599	13.8324	0.983819	1.14798	1.1409	11.6923	11.5974	0.991876	1.0679	1.06436	N/A	N/A		Bound
6651	SON	SON DNA binding protein	protein-coding gene	gene with protein product	6.47369	6.02204	0.930233	0.811152	0.779744	6.38863	6.38863	1	0.805408	0.805408	6.43102	6.20263	0.964486	0.80828	0.792576	4.68166	4.68166	1	0.6704	0.6704	30.3949	30.1219	0.991018	1.4828	1.47888	11.9289	11.8752	0.995499	1.0766	1.07464	1.8549	0.891342	Bound	Bound
6659	SOX4	SRY (sex determining region Y)-box 4	protein-coding gene	gene with protein product	9.33416	9.18361	0.983871	0.970075	0.963013	8.51817	8.51817	1	0.930346	0.930346	8.91684	8.84463	0.991903	0.950211	0.94668	N/A	N/A	N/A	N/A	N/A	26.2998	26.2543	0.99827	1.41995	1.4192	N/A	N/A	N/A	N/A	N/A	N/A	N/A	Bound
6720	SREBF1	sterol regulatory element binding transcription factor 1	protein-coding gene	gene with protein product	7.52755	6.92535	0.920001	0.876654	0.840442	6.69285	6.49004	0.969698	0.825611	0.812247	7.09794	6.70416	0.944522	0.851132	0.826345	12.6045	11.344	0.900001	1.10052	1.05477	48.9595	38.4941	0.786245	1.68984	1.58539	24.8417	20.8969	0.841202	1.39518	1.32008	3.49984	1.80729	Bound	Bound		X	X
6734	SRPR	signal recognition particle receptor (docking protein)	protein-coding gene	gene with protein product	14.4529	14.1518	0.979167	1.15995	1.15081	3.34643	3.34643	1	0.524582	0.524582	6.95453	6.88171	0.989529	0.842268	0.837696	16.2057	6.4823	0.4	1.20967	0.811729	11.6484	11.6484	1	1.06626	1.06626	13.7394	8.68954	0.632456	1.13797	0.938997	1.9756	0.98229	Bound	Bound		X
6745	SSR1	signal sequence receptor, alpha	protein-coding gene	gene with protein product	N/A	N/A	N/A	N/A	N/A	5.78019	5.62808	0.973684	0.761942	0.75036	N/A	N/A	N/A	N/A	N/A	16.5659	16.3858	0.989131	1.21921	1.21447	63.2469	51.4772	0.813909	1.80104	1.71162	32.3688	29.043	0.897253	1.51013	1.46304	N/A	N/A		Bound	X	X	X
6746	SSR2	signal sequence receptor, beta (translocon-associated protein beta)	protein-coding gene	gene with protein product	38.24	25.142	0.657481	1.58252	1.4004	14.9068	10.4956	0.704081	1.17338	1.02101	23.8754	16.2444	0.680382	1.37795	1.2107	11.164	6.12218	0.548388	1.04782	0.786906	93.4598	62.1549	0.665044	1.97062	1.79348	32.3014	19.507	0.603906	1.50922	1.29019	1.35292	0.436071	Bound	Bound	X	X			X
6747	SSR3	signal sequence receptor, gamma (translocon-associated protein gamma)	protein-coding gene	gene with protein product	39.2938	29.0061	0.738186	1.59432	1.46249	67.1313	27.8362	0.414652	1.82693	1.44461	51.36	28.4151	0.553254	1.71062	1.45355	11.7042	11.4341	0.976923	1.06834	1.0582	139.007	113.966	0.819856	2.14304	2.05677	40.3357	36.0984	0.89495	1.60569	1.55749	0.785352	-0.348589	Bound	Bound		X	X
6748	SSR4	signal sequence receptor, delta	protein-coding gene	gene with protein product	4.51653	4.51653	1	0.654805	0.654805	7.90973	5.78019	0.73077	0.898162	0.761942	5.977	5.10944	0.854851	0.776483	0.708374	3.60128	3.60128	1	0.556457	0.556457	44.0453	43.7723	0.993802	1.6439	1.6412	12.5944	12.5553	0.996896	1.10018	1.09883	2.10715	1.07529	Bound	Bound	X	X	X
6782	HSPA13	heat shock protein 70kDa family, member 13	protein-coding gene	gene with protein product	12.2448	11.191	0.913934	1.08795	1.04887	16.7322	12.473	0.745452	1.22355	1.09597	14.3137	11.8146	0.825406	1.15575	1.07242	7.56269	7.56269	1	0.878676	0.878676	29.4848	29.3938	0.996914	1.4696	1.46826	14.9327	14.9096	0.998456	1.17414	1.17347	1.04324	0.0610755	Bound	Bound	X			X
6836	SURF4	surfeit 4	protein-coding gene	gene with protein product	35.2289	26.9988	0.766382	1.5469	1.43134	24.6419	19.7743	0.802469	1.39167	1.2961	29.4636	23.1059	0.784218	1.46929	1.36372	11.164	11.164	1	1.04782	1.04782	108.839	78.7931	0.723941	2.03679	1.89649	34.8579	29.6588	0.850847	1.5423	1.47215	1.18308	0.242551	Bound	Bound		X	X
6891	TAP2	transporter 2, ATP-binding cassette, sub-family B (MDR/TAP)	protein-coding gene	gene with protein product	3.91432	3.91432	1	0.592656	0.592656	3.0422	2.89009	0.95	0.483188	0.460911	3.45082	3.36344	0.974679	0.537922	0.526784	3.60128	3.60128	1	0.556457	0.556457	18.2005	13.4684	0.74	1.26008	1.12932	8.096	6.96444	0.860233	0.908271	0.842886	2.34611	1.23027		Bound		X	X
6926	TBX3	T-box 3	protein-coding gene	gene with protein product	8.73195	5.41983	0.62069	0.941111	0.733986	3.65065	3.65065	1	0.56237	0.56237	5.646	4.44813	0.787839	0.751741	0.648178	N/A	N/A	N/A	N/A	N/A	13.2864	13.1954	0.99315	1.12341	1.12042	N/A	N/A	N/A	N/A	N/A	N/A	N/A	Bound
7009	TMBIM6	transmembrane BAX inhibitor motif containing 6	protein-coding gene	gene with protein product	42.6561	35.9817	0.843529	1.62998	1.55608	31.6389	26.3151	0.831731	1.50022	1.4202	36.7368	30.7711	0.837609	1.5651	1.48814	29.1703	27.0096	0.925926	1.46494	1.43152	143.056	132.955	0.929389	2.15551	2.1237	64.5987	59.9254	0.927656	1.81022	1.77761	1.75842	0.814279	Bound	Bound		X	X
7094	TLN1	talin 1	protein-coding gene	gene with protein product	N/A	N/A	N/A	N/A	N/A	N/A	N/A	N/A	N/A	N/A	N/A	N/A	N/A	N/A	N/A	3.60128	3.60128	1	0.556457	0.556457	7.28022	7.18921	0.987499	0.862145	0.856681	5.12036	5.08826	0.99373	0.709301	0.706569	N/A	N/A		Bound
7162	TPBG	trophoblast glycoprotein	protein-coding gene	gene with protein product	3.61322	3.61322	1	0.557894	0.557894	9.43083	9.43083	1	0.97455	0.97455	5.83744	5.83744	1	0.766222	0.766222	3.60128	3.60128	1	0.556457	0.556457	29.5759	29.1664	0.986154	1.47094	1.46488	10.3204	10.2487	0.993053	1.0137	1.01067	1.76797	0.822094		Bound	X	X	X
7184	HSP90B1	heat shock protein 90kDa beta (Grp94), member 1	protein-coding gene	gene with protein product	4.51653	4.36598	0.966667	0.654805	0.640082	30.8936	23.2881	0.753816	1.48987	1.36713	11.8124	10.0834	0.853633	1.07234	1.00361	14.225	14.225	1	1.15305	1.15305	77.8224	56.6491	0.727928	1.8911	1.75319	33.272	28.3873	0.853187	1.52208	1.45312	2.81671	1.49401	Bound	Bound	X			X
7343	UBTF	upstream binding transcription factor, RNA polymerase I	protein-coding gene	gene with protein product	N/A	N/A	N/A	N/A	N/A	N/A	N/A	N/A	N/A	N/A	N/A	N/A	N/A	N/A	N/A	6.84243	6.84243	1	0.83521	0.83521	6.00618	5.91517	0.984847	0.778598	0.771967	6.41068	6.36193	0.992395	0.806904	0.803589	N/A	N/A		Bound
7355	SLC35A2	solute carrier family 35 (UDP-galactose transporter), member A2	protein-coding gene	gene with protein product	4.21543	4.21543	1	0.624842	0.624842	11.8646	7.60551	0.641025	1.07425	0.881128	7.07209	5.6622	0.800641	0.849547	0.752985	N/A	N/A	N/A	N/A	N/A	8.55425	8.55425	1	0.932182	0.932182	N/A	N/A	N/A	N/A	N/A	N/A	N/A	Bound			X	X
7371	UCK2	uridine-cytidine kinase 2	protein-coding gene	gene with protein product	N/A	N/A	N/A	N/A	N/A	N/A	N/A	N/A	N/A	N/A	N/A	N/A	N/A	N/A	N/A	7.20256	5.88209	0.816667	0.857487	0.769532	11.6484	8.91827	0.765625	1.06626	0.950281	9.15958	7.24279	0.790734	0.961876	0.859906	N/A	N/A		Bound
7431	VIM	vimentin	protein-coding gene	gene with protein product	N/A	N/A	N/A	N/A	N/A	N/A	N/A	N/A	N/A	N/A	N/A	N/A	N/A	N/A	N/A	3.60128	3.60128	1	0.556457	0.556457	18.2369	14.7424	0.808383	1.26095	1.16857	8.10409	7.2864	0.899101	0.908704	0.862513	N/A	N/A		Bound
7494	XBP1	X-box binding protein 1	protein-coding gene	gene with protein product	N/A	N/A	N/A	N/A	N/A	N/A	N/A	N/A	N/A	N/A	N/A	N/A	N/A	N/A	N/A	7.02249	4.62164	0.65812	0.846491	0.664796	5.09615	5.09615	1	0.707242	0.707242	5.98228	4.8531	0.811246	0.776867	0.686019	N/A	N/A		Bound	X	X	X
7503	XIST	X inactive specific transcript (non-protein coding)	non-coding RNA	RNA, long non-coding	7.82864	7.82864	1	0.893686	0.893686	6.69285	6.69285	1	0.825611	0.825611	7.2385	7.2385	1	0.859649	0.859649	20.5273	20.5273	1	1.31233	1.31233	82.3574	70.0721	0.850829	1.9157	1.84554	41.1166	37.9261	0.922404	1.61402	1.57894	5.68026	2.50596		Bound
7841	MOGS	mannosyl-oligosaccharide glucosidase	protein-coding gene	gene with protein product	5.5202	5.41983	0.981818	0.741955	0.733986	4.86753	4.86753	1	0.687309	0.687309	5.1836	5.13626	0.990867	0.714632	0.710647	6.84243	6.84243	1	0.83521	0.83521	13.8324	13.8324	1	1.1409	1.1409	9.72868	9.72868	1	0.988054	0.988054	1.87682	0.908289	Bound			X	X
7922	SLC39A7	solute carrier family 39 (zinc transporter), member 7	protein-coding gene	gene with protein product	26.7981	21.5288	0.803371	1.4281	1.33302	3.95487	3.95487	1	0.597132	0.597132	10.2948	9.22733	0.896309	1.01262	0.965076	19.4469	15.1254	0.777778	1.28885	1.17971	45.1737	38.0391	0.842063	1.65489	1.58023	29.6393	23.9866	0.809282	1.47187	1.37997	2.87906	1.5256	Bound	Bound		X	X
8038	ADAM12	ADAM metallopeptidase domain 12	protein-coding gene	gene with protein product	N/A	N/A	N/A	N/A	N/A	N/A	N/A	N/A	N/A	N/A	N/A	N/A	N/A	N/A	N/A	4.86173	4.77169	0.98148	0.686791	0.678672	5.82417	2.91209	0.500001	0.765234	0.464205	5.32124	3.72768	0.700529	0.726012	0.571439	N/A	N/A		Bound	X	X			X
8085	KMT2D	lysine (K)-specific methyltransferase 2D	protein-coding gene	gene with protein product	8.53122	7.377	0.864706	0.931011	0.86788	3.65065	3.49854	0.958333	0.56237	0.543887	5.58073	5.08023	0.910317	0.746691	0.705883	3.96141	3.96141	1	0.59785	0.59785	4.18612	4.18612	1	0.621812	0.621812	4.07222	4.07222	1	0.609831	0.609831	0.729693	-0.454639	Bound
8140	SLC7A5	solute carrier family 7 (amino acid transporter light chain, L system), member 5	protein-coding gene	gene with protein product	3.61322	3.61322	1	0.557894	0.557894	4.86753	4.86753	1	0.687309	0.687309	4.19374	4.19374	1	0.622602	0.622602	9.00319	6.84243	0.760001	0.954396	0.83521	9.10027	9.00927	0.99	0.959054	0.95469	9.0516	7.85145	0.86741	0.956725	0.89495	2.15836	1.10994		Bound		X	X
8321	FZD1	frizzled class receptor 1	protein-coding gene	gene with protein product	12.0441	11.8935	0.9875	1.08077	1.07531	3.0422	2.89009	0.95	0.483188	0.460911	6.05314	5.86288	0.968569	0.781981	0.768111	4.32153	4.32153	1	0.635638	0.635638	5.09615	5.09615	1	0.707242	0.707242	4.69288	4.69288	1	0.67144	0.67144	0.775281	-0.367209	Bound		X	X	X
8324	FZD7	frizzled class receptor 7	protein-coding gene	gene with protein product	3.91432	3.76377	0.961539	0.592656	0.575623	3.0422	3.0422	1	0.483188	0.483188	3.45082	3.38381	0.980581	0.537922	0.529405	23.7684	12.2443	0.515152	1.376	1.08794	58.3328	25.6173	0.439157	1.76591	1.40853	37.2354	17.7106	0.475639	1.57096	1.24823	10.7903	3.43167		Bound	X	X	X
8560	DEGS1	delta(4)-desaturase, sphingolipid 1	protein-coding gene	gene with protein product	N/A	N/A	N/A	N/A	N/A	9.73505	9.58294	0.984375	0.988338	0.981499	N/A	N/A	N/A	N/A	N/A	11.8842	6.12217	0.515152	1.07497	0.786905	60.4258	59.9708	0.99247	1.78122	1.77794	26.7976	19.1612	0.715033	1.4281	1.28242	N/A	N/A		Bound		X	X
8565	YARS	tyrosyl-tRNA synthetase	protein-coding gene	gene with protein product	N/A	N/A	N/A	N/A	N/A	N/A	N/A	N/A	N/A	N/A	N/A	N/A	N/A	N/A	N/A	13.6849	13.5048	0.986842	1.13624	1.13049	14.9244	13.0134	0.871951	1.1739	1.11439	14.2912	13.2568	0.927619	1.15507	1.12244	N/A	N/A		Bound
8570	KHSRP	KH-type splicing regulatory protein	protein-coding gene	gene with protein product	N/A	N/A	N/A	N/A	N/A	5.78019	5.62808	0.973684	0.761942	0.75036	N/A	N/A	N/A	N/A	N/A	3.60128	3.60128	1	0.556457	0.556457	11.2843	7.64422	0.677419	1.05248	0.883333	6.3748	5.24681	0.823055	0.804466	0.719895	N/A	N/A		Bound
8614	STC2	stanniocalcin 2	protein-coding gene	gene with protein product	3.01102	3.01102	1	0.478714	0.478714	N/A	N/A	N/A	N/A	N/A	N/A	N/A	N/A	N/A	N/A	9.36332	6.66236	0.711538	0.97143	0.823628	37.6448	34.2018	0.908541	1.5757	1.53405	18.7745	15.0952	0.804028	1.27357	1.17884	N/A	N/A		Bound	X			X
8703	B4GALT3	UDP-Gal:betaGlcNAc beta 1,4- galactosyltransferase, polypeptide 3	protein-coding gene	gene with protein product	N/A	N/A	N/A	N/A	N/A	N/A	N/A	N/A	N/A	N/A	N/A	N/A	N/A	N/A	N/A	14.045	13.9249	0.991452	1.14752	1.14379	28.3929	18.4735	0.65064	1.45321	1.26655	19.9694	16.0388	0.803168	1.30037	1.20517	N/A	N/A		Bound		X
8763	CD164	CD164 molecule, sialomucin	protein-coding gene	gene with protein product	8.12975	7.9792	0.981482	0.910077	0.901959	6.0844	6.0844	1	0.784218	0.784218	7.03311	6.96769	0.990698	0.847147	0.843089	16.926	16.926	1	1.22855	1.22855	71.9831	60.4258	0.839443	1.85723	1.78122	34.9054	31.9807	0.916211	1.54289	1.50489	4.96301	2.31121	Bound	Bound	X	X			X
8829	NRP1	neuropilin 1	protein-coding gene	gene with protein product	6.02204	6.02204	1	0.779744	0.779744	N/A	N/A	N/A	N/A	N/A	N/A	N/A	N/A	N/A	N/A	18.0064	18.0064	1	1.25543	1.25543	19.6566	13.4684	0.685186	1.29351	1.12932	18.8134	15.573	0.827759	1.27447	1.19237	N/A	N/A		Bound	X	X			X
9197	SLC33A1	solute carrier family 33 (acetyl-CoA transporter), member 1	protein-coding gene	gene with protein product	5.72094	5.72094	1	0.757467	0.757467	N/A	N/A	N/A	N/A	N/A	N/A	N/A	N/A	N/A	N/A	3.60128	1.80064	0.5	0.556457	0.255427	27.0581	27.0581	1	1.4323	1.4323	9.87137	6.98011	0.707107	0.994377	0.843862	N/A	N/A		Bound		X	X
9354	UBE4A	ubiquitination factor E4A	protein-coding gene	gene with protein product	3.61322	3.61322	1	0.557894	0.557894	N/A	N/A	N/A	N/A	N/A	N/A	N/A	N/A	N/A	N/A	12.9646	12.7845	0.986111	1.11276	1.10669	30.6679	20.0509	0.653809	1.48668	1.30213	19.9398	16.0107	0.80295	1.29972	1.20441	N/A	N/A		Bound
9415	FADS2	fatty acid desaturase 2	protein-coding gene	gene with protein product	5.11873	4.96818	0.970588	0.709162	0.696197	8.8224	8.8224	1	0.945587	0.945587	6.72008	6.62052	0.985184	0.827374	0.820892	13.5048	9.54338	0.706666	1.13049	0.979702	54.5106	49.2325	0.903172	1.73648	1.69225	27.1322	21.6759	0.7989	1.43348	1.33598	4.03748	2.01345	Bound	Bound		X	X
9510	ADAMTS1	ADAM metallopeptidase with thrombospondin type 1 motif, 1	protein-coding gene	gene with protein product	3.91432	3.91432	1	0.592656	0.592656	5.78019	1.5211	0.263157	0.761942	0.182158	4.75663	2.4401	0.512989	0.677299	0.387407	10.0836	9.90352	0.982143	1.00361	0.99579	54.0556	40.6782	0.752525	1.73284	1.60936	23.3468	20.0713	0.859702	1.36823	1.30258	4.90827	2.29521		Bound	X				X
9528	TMEM59	transmembrane protein 59	protein-coding gene	gene with protein product	7.82865	5.41983	0.692307	0.893687	0.733986	N/A	N/A	N/A	N/A	N/A	N/A	N/A	N/A	N/A	N/A	3.96141	3.96141	1	0.59785	0.59785	9.9648	7.32571	0.735159	0.998469	0.86485	6.28289	5.38703	0.857414	0.798159	0.73135	N/A	N/A		Bound	X	X			X
9563	H6PD	hexose-6-phosphate dehydrogenase (glucose 1-dehydrogenase)	protein-coding gene	gene with protein product	N/A	N/A	N/A	N/A	N/A	N/A	N/A	N/A	N/A	N/A	N/A	N/A	N/A	N/A	N/A	7.20256	7.20256	1	0.857487	0.857487	9.73729	7.32572	0.752337	0.988438	0.86485	8.37457	7.26388	0.867373	0.922962	0.861169	N/A	N/A		Bound	X			X
9590	AKAP12	A kinase (PRKA) anchor protein 12	protein-coding gene	gene with protein product	N/A	N/A	N/A	N/A	N/A	N/A	N/A	N/A	N/A	N/A	N/A	N/A	N/A	N/A	N/A	7.56269	5.76205	0.761905	0.878676	0.760577	5.09615	5.09615	1	0.707242	0.707242	6.20811	5.41888	0.872872	0.792959	0.73391	N/A	N/A		Bound
9601	PDIA4	protein disulfide isomerase family A, member 4	protein-coding gene	gene with protein product	35.7558	28.0276	0.78386	1.55335	1.44759	14.9068	13.2336	0.887755	1.17338	1.12168	23.0869	19.2589	0.834191	1.36337	1.28463	5.76204	5.58198	0.968751	0.760576	0.746788	58.5147	54.3285	0.928461	1.76726	1.73503	18.362	17.4144	0.948392	1.26392	1.24091	0.795343	-0.330351	Bound	Bound	X			X
9632	SEC24C	SEC24 homolog C, COPII coat complex component	protein-coding gene	gene with protein product	9.63526	7.6781	0.796875	0.983863	0.885254	3.0422	3.0422	1	0.483188	0.483188	5.41409	4.83304	0.892679	0.733526	0.684221	N/A	N/A	N/A	N/A	N/A	3.59461	3.52635	0.98101	0.555652	0.547325	N/A	N/A	N/A	N/A	N/A	N/A	N/A	Bound
9679	FAM53B	family with sequence similarity 53, member B	protein-coding gene	gene with protein product	N/A	N/A	N/A	N/A	N/A	4.86753	4.86753	1	0.687309	0.687309	N/A	N/A	N/A	N/A	N/A	4.32153	4.32153	1	0.635638	0.635638	8.00824	4.00411	0.499999	0.903537	0.602506	5.88284	4.15979	0.707106	0.769587	0.619072	N/A	N/A		Bound
9682	KDM4A	lysine (K)-specific demethylase 4A	protein-coding gene	gene with protein product	N/A	N/A	N/A	N/A	N/A	N/A	N/A	N/A	N/A	N/A	N/A	N/A	N/A	N/A	N/A	8.7331	8.68808	0.994845	0.941168	0.938924	5.64217	5.64217	1	0.751446	0.751446	7.01952	7.0014	0.997419	0.846307	0.845185	N/A	N/A		Bound
9685	CLINT1	clathrin interactor 1	protein-coding gene	gene with protein product	N/A	N/A	N/A	N/A	N/A	N/A	N/A	N/A	N/A	N/A	N/A	N/A	N/A	N/A	N/A	5.04179	4.86173	0.964286	0.702585	0.686791	5.73317	5.68767	0.992064	0.758395	0.754934	5.37638	5.25851	0.978077	0.73049	0.720863	N/A	N/A		Bound
9746	CLSTN3	calsyntenin 3	protein-coding gene	gene with protein product	9.93636	6.92534	0.69697	0.997227	0.840441	3.0422	2.89009	0.95	0.483188	0.460911	5.49804	4.4738	0.813708	0.740208	0.650676	3.60128	3.60128	1	0.556457	0.556457	N/A	N/A	N/A	N/A	N/A	N/A	N/A	N/A	N/A	N/A	N/A	N/A	Bound		X	X			X
9747	TCAF1	TRPM8 channel-associated factor 1	protein-coding gene	gene with protein product	N/A	N/A	N/A	N/A	N/A	N/A	N/A	N/A	N/A	N/A	N/A	N/A	N/A	N/A	N/A	5.04179	5.04179	1	0.702585	0.702585	5.73317	5.59667	0.976191	0.758395	0.74793	5.37638	5.31199	0.988024	0.73049	0.725257	N/A	N/A		Bound
9761	MLEC	malectin	protein-coding gene	gene with protein product	8.43085	8.43085	1	0.925871	0.925871	11.2562	9.58294	0.851351	1.05139	0.981499	9.74161	8.98846	0.922687	0.988631	0.953685	9.36332	6.4823	0.692308	0.97143	0.811729	37.4931	32.0633	0.855178	1.57395	1.50601	18.7366	14.4168	0.769445	1.27269	1.15887	1.92336	0.943627	Bound	Bound	X	X			X
9777	TM9SF4	transmembrane 9 superfamily protein member 4	protein-coding gene	gene with protein product	3.61322	3.61322	1	0.557894	0.557894	N/A	N/A	N/A	N/A	N/A	N/A	N/A	N/A	N/A	N/A	3.60128	3.60128	1	0.556457	0.556457	13.3774	13.3319	0.996599	1.12637	1.12489	6.94087	6.92906	0.998298	0.841414	0.840674	N/A	N/A		Bound	X	X	X
9883	POM121	POM121 transmembrane nucleoporin	protein-coding gene	gene with protein product	6.77479	6.62424	0.977778	0.830896	0.821136	N/A	N/A	N/A	N/A	N/A	N/A	N/A	N/A	N/A	N/A	4.14147	4.05144	0.978261	0.617155	0.607609	9.28228	9.28228	1	0.967655	0.967655	6.20018	6.13242	0.989071	0.792405	0.787632	N/A	N/A		Bound		X
9900	SV2A	synaptic vesicle glycoprotein 2A	protein-coding gene	gene with protein product	3.61322	3.61322	1	0.557894	0.557894	6.0844	4.5633	0.75	0.784218	0.659279	4.68874	4.06057	0.866025	0.671056	0.608587	3.24115	3.24115	1	0.510699	0.510699	19.0196	18.8831	0.992823	1.2792	1.27607	7.85145	7.82322	0.996405	0.89495	0.893386	1.67453	0.743759		Bound		X	X
9962	SLC23A2	solute carrier family 23 (ascorbic acid transporter), member 2	protein-coding gene	gene with protein product	3.31212	3.31212	1	0.520106	0.520106	N/A	N/A	N/A	N/A	N/A	N/A	N/A	N/A	N/A	N/A	3.24115	3.24115	1	0.510699	0.510699	12.9588	12.8496	0.991573	1.11256	1.10889	6.48085	6.45348	0.995777	0.811632	0.809794	N/A	N/A		Bound		X	X
9993	DGCR2	DiGeorge syndrome critical region gene 2	protein-coding gene	gene with protein product	12.9474	12.9474	1	1.11218	1.11218	6.69285	5.983	0.893939	0.825611	0.776919	9.30886	8.80137	0.945484	0.968896	0.94455	7.20256	7.20256	1	0.857487	0.857487	5.27816	5.27816	1	0.722483	0.722483	6.16573	6.16573	1	0.789985	0.789985	0.662351	-0.594332	Bound		X	X			X
10075	HUWE1	HECT, UBA and WWE domain containing 1, E3 ubiquitin protein ligase	protein-coding gene	gene with protein product	N/A	N/A	N/A	N/A	N/A	3.65065	3.65065	1	0.56237	0.56237	N/A	N/A	N/A	N/A	N/A	9.36332	7.20256	0.769231	0.97143	0.857487	5.64217	5.64217	1	0.751446	0.751446	7.26839	6.3748	0.877058	0.861438	0.804467	N/A	N/A		Bound			X
10121	ACTR1A	ARP1 actin-related protein 1 homolog A, centractin alpha (yeast)	protein-coding gene	gene with protein product	N/A	N/A	N/A	N/A	N/A	5.47597	5.47597	1	0.738461	0.738461	N/A	N/A	N/A	N/A	N/A	9.72345	8.10288	0.833334	0.98782	0.908639	10.9203	10.9203	1	1.03824	1.03824	10.3045	9.4067	0.912871	1.01303	0.973437	N/A	N/A		Bound
10130	PDIA6	protein disulfide isomerase family A, member 6	protein-coding gene	gene with protein product	14.1518	12.4957	0.882979	1.15081	1.09676	N/A	N/A	N/A	N/A	N/A	N/A	N/A	N/A	N/A	N/A	3.96141	3.96141	1	0.59785	0.59785	61.3358	52.6905	0.859051	1.78771	1.72173	15.5877	14.4475	0.92685	1.19278	1.15979	N/A	N/A		Bound	X				X
10155	TRIM28	tripartite motif containing 28	protein-coding gene	gene with protein product	N/A	N/A	N/A	N/A	N/A	3.34643	3.34643	1	0.524582	0.524582	N/A	N/A	N/A	N/A	N/A	3.24115	3.24115	1	0.510699	0.510699	17.9275	17.6545	0.984771	1.25352	1.24686	7.62272	7.56445	0.992357	0.88211	0.878778	N/A	N/A		Bound				X
10159	ATP6AP2	ATPase, H+ transporting, lysosomal accessory protein 2	protein-coding gene	gene with protein product	8.73196	4.81763	0.551724	0.941112	0.682833	14.8308	13.6899	0.923077	1.17116	1.1364	11.3799	8.12114	0.713641	1.05614	0.909617	N/A	N/A	N/A	N/A	N/A	43.1352	41.4972	0.962026	1.63483	1.61802	N/A	N/A	N/A	N/A	N/A	N/A	N/A	Bound		X	X			X
10175	CNIH1	cornichon family AMPA receptor auxiliary protein 1	protein-coding gene	gene with protein product	N/A	N/A	N/A	N/A	N/A	N/A	N/A	N/A	N/A	N/A	N/A	N/A	N/A	N/A	N/A	8.64307	6.06215	0.701389	0.936668	0.782627	18.9286	18.5646	0.98077	1.27712	1.26868	12.7907	10.6085	0.829398	1.10689	1.02566	N/A	N/A		Bound		X	X
10269	ZMPSTE24	zinc metallopeptidase STE24	protein-coding gene	gene with protein product	3.61322	3.61322	1	0.557894	0.557894	6.08441	6.08441	1	0.784218	0.784218	4.68874	4.68874	1	0.671056	0.671056	3.24115	3.24115	1	0.510699	0.510699	26.2087	9.73729	0.371528	1.41845	0.988438	9.21664	5.61783	0.609531	0.964573	0.749569	1.9657	0.97504		Bound		X	X
10280	SIGMAR1	sigma non-opioid intracellular receptor 1	protein-coding gene	gene with protein product	8.43085	8.43085	1	0.925871	0.925871	13.3857	7.22523	0.539772	1.12664	0.858852	10.6232	7.8048	0.734692	1.02626	0.892362	N/A	N/A	N/A	N/A	N/A	22.5687	19.7476	0.875	1.35351	1.29551	N/A	N/A	N/A	N/A	N/A	N/A	N/A	Bound			X			X
10399	GNB2L1	guanine nucleotide binding protein (G protein), beta polypeptide 2-like 1	protein-coding gene	gene with protein product	3.61322	3.61322	1	0.557894	0.557894	3.0422	3.0422	1	0.483188	0.483188	3.31544	3.31544	1	0.520541	0.520541	3.60128	3.60128	1	0.556457	0.556457	15.8344	9.82829	0.620691	1.1996	0.992478	7.55144	5.94932	0.78784	0.87803	0.774467	2.27766	1.18755		Bound		X
10400	PEMT	phosphatidylethanolamine N-methyltransferase	protein-coding gene	gene with protein product	5.11873	5.11873	1	0.709162	0.709162	N/A	N/A	N/A	N/A	N/A	N/A	N/A	N/A	N/A	N/A	3.96141	3.78134	0.954544	0.59785	0.577646	8.73626	6.33986	0.725695	0.941326	0.80208	5.88285	4.89624	0.832291	0.769588	0.689863	N/A	N/A		Bound		X	X
10525	HYOU1	hypoxia up-regulated 1	protein-coding gene	gene with protein product	4.21543	1.80661	0.428571	0.624842	0.256864	N/A	N/A	N/A	N/A	N/A	N/A	N/A	N/A	N/A	N/A	4.32153	4.14147	0.958334	0.635638	0.617155	61.6695	32.3666	0.52484	1.79007	1.5101	16.325	11.5778	0.709205	1.21285	1.06363	N/A	N/A		Bound	X			X
10554	AGPAT1	1-acylglycerol-3-phosphate O-acyltransferase 1	protein-coding gene	gene with protein product	21.3782	10.9902	0.514084	1.32997	1.04101	4.25909	1.82532	0.42857	0.629317	0.261339	9.54211	4.47891	0.469384	0.979644	0.651173	N/A	N/A	N/A	N/A	N/A	22.5687	22.5687	1	1.35351	1.35351	N/A	N/A	N/A	N/A	N/A	N/A	N/A	Bound		X	X	X
10567	RABAC1	Rab acceptor 1 (prenylated)	protein-coding gene	gene with protein product	7.22644	7.22644	1	0.858924	0.858924	N/A	N/A	N/A	N/A	N/A	N/A	N/A	N/A	N/A	N/A	4.32153	4.32153	1	0.635638	0.635638	16.5625	11.254	0.679487	1.21913	1.05131	8.46022	6.97384	0.82431	0.927382	0.843472	N/A	N/A		Bound		X	X
10592	SMC2	structural maintenance of chromosomes 2	protein-coding gene	gene with protein product	N/A	N/A	N/A	N/A	N/A	N/A	N/A	N/A	N/A	N/A	N/A	N/A	N/A	N/A	N/A	3.96141	3.96141	1	0.59785	0.59785	21.3856	19.9751	0.934044	1.33012	1.30049	9.2042	8.89548	0.96646	0.963986	0.94917	N/A	N/A		Bound
10594	PRPF8	pre-mRNA processing factor 8	protein-coding gene	gene with protein product	12.3452	12.0441	0.97561	1.0915	1.08077	3.0422	3.0422	1	0.483188	0.483188	6.12834	6.05314	0.98773	0.787343	0.781981	N/A	N/A	N/A	N/A	N/A	34.035	31.4869	0.925134	1.53193	1.49813	N/A	N/A	N/A	N/A	N/A	N/A	N/A	Bound
10653	SPINT2	serine peptidase inhibitor, Kunitz type, 2	protein-coding gene	gene with protein product	12.9474	9.18361	0.709303	1.11218	0.963013	N/A	N/A	N/A	N/A	N/A	N/A	N/A	N/A	N/A	N/A	7.92281	2.16077	0.272728	0.898879	0.334609	35.673	33.0339	0.926021	1.55234	1.51896	16.8116	8.4486	0.502545	1.22561	0.926785	N/A	N/A		Bound	X	X			X
10908	PNPLA6	patatin-like phospholipase domain containing 6	protein-coding gene	gene with protein product	3.91432	3.76377	0.961539	0.592656	0.575623	16.8842	16.3011	0.965465	1.22748	1.21222	8.12959	7.83285	0.9635	0.910068	0.89392	10.2636	10.1736	0.991231	1.0113	1.00747	22.6597	18.5342	0.817937	1.35525	1.26797	15.2503	13.7317	0.900425	1.18328	1.13772	1.8759	0.907579	Bound	Bound		X	X
10916	MAGED2	melanoma antigen family D2	protein-coding gene	gene with protein product	N/A	N/A	N/A	N/A	N/A	3.0422	3.0422	1	0.483188	0.483188	N/A	N/A	N/A	N/A	N/A	4.32153	2.16077	0.500001	0.635638	0.334609	12.3764	12.3764	1	1.09259	1.09259	7.31333	5.17131	0.707108	0.864115	0.713601	N/A	N/A		Bound
10945	KDELR1	KDEL (Lys-Asp-Glu-Leu) endoplasmic reticulum protein retention receptor 1	protein-coding gene	gene with protein product	27.4003	26.7981	0.978024	1.43775	1.4281	6.99708	6.99708	1	0.844917	0.844917	13.8464	13.6934	0.988951	1.14134	1.13651	16.926	15.1254	0.893619	1.22855	1.17971	61.3359	43.6965	0.712413	1.78771	1.64045	32.2207	25.7085	0.797889	1.50813	1.41008	2.32701	1.21848	Bound	Bound		X	X
10956	OS9	osteosarcoma amplified 9, endoplasmic reticulum lectin	protein-coding gene	gene with protein product	N/A	N/A	N/A	N/A	N/A	3.34643	3.34643	1	0.524582	0.524582	N/A	N/A	N/A	N/A	N/A	8.28294	8.28294	1	0.918185	0.918185	7.82623	5.73317	0.732558	0.893553	0.758395	8.05135	6.89112	0.855896	0.905869	0.83829	N/A	N/A		Bound	X			X
10959	TMED2	transmembrane p24 trafficking protein 2	protein-coding gene	gene with protein product	18.0661	16.8617	0.933333	1.25686	1.2269	25.5545	23.501	0.919641	1.40747	1.37109	21.4865	19.9065	0.926462	1.33217	1.29899	37.4533	31.1511	0.831732	1.57349	1.49347	120.123	107.019	0.89091	2.07963	2.02946	67.0747	57.7388	0.860813	1.82656	1.76147	3.12171	1.64234	Bound	Bound	X	X			X
10960	LMAN2	lectin, mannose-binding 2	protein-coding gene	gene with protein product	5.26928	5.26928	1	0.721751	0.721751	8.88324	8.88324	1	0.948571	0.948571	6.84166	6.84166	1	0.835161	0.835161	12.6045	10.8038	0.857143	1.10052	1.03358	35.491	29.8489	0.841027	1.55012	1.47493	21.1506	17.9578	0.849047	1.32532	1.25425	3.09144	1.62828		Bound	X	X			X
10961	ERP29	endoplasmic reticulum protein 29	protein-coding gene	gene with protein product	9.03306	1.80661	0.2	0.955835	0.256864	N/A	N/A	N/A	N/A	N/A	N/A	N/A	N/A	N/A	N/A	3.24115	1.62058	0.500002	0.510699	0.20967	52.7512	38.2514	0.725128	1.72223	1.58265	13.0757	7.87334	0.602134	1.11647	0.896159	N/A	N/A		Bound	X			X
10972	TMED10	transmembrane p24 trafficking protein 10	protein-coding gene	gene with protein product	13.5496	13.5496	1	1.13193	1.13193	12.4731	11.2562	0.902439	1.09597	1.05139	13.0002	12.3498	0.949968	1.11395	1.09166	3.06109	3.06109	1	0.485876	0.485876	18.5646	18.5646	1	1.26868	1.26868	7.53842	7.53842	1	0.87728	0.87728	0.57987	-0.786198	Bound		X	X	X
10985	GCN1	GCN1 eIF2 alpha kinase activator homolog	protein-coding gene	gene with protein product	8.43085	6.92534	0.821428	0.925871	0.840441	3.65065	3.65065	1	0.56237	0.56237	5.5478	5.02812	0.906327	0.744121	0.701406	3.60128	3.60128	1	0.556457	0.556457	9.9193	9.8738	0.995413	0.996481	0.994484	5.9768	5.96308	0.997704	0.776469	0.775471	1.07733	0.107458	Bound	Bound
10994	ILVBL	ilvB (bacterial acetolactate synthase)-like	protein-coding gene	gene with protein product	N/A	N/A	N/A	N/A	N/A	N/A	N/A	N/A	N/A	N/A	N/A	N/A	N/A	N/A	N/A	3.60128	3.60128	1	0.556457	0.556457	11.2843	8.82726	0.782258	1.05248	0.945826	6.3748	5.63821	0.884453	0.804467	0.751141	N/A	N/A		Bound		X	X
11018	TMED1	transmembrane p24 trafficking protein 1	protein-coding gene	gene with protein product	N/A	N/A	N/A	N/A	N/A	N/A	N/A	N/A	N/A	N/A	N/A	N/A	N/A	N/A	N/A	4.32153	4.32153	1	0.635638	0.635638	8.55425	8.37225	0.978724	0.932182	0.922842	6.08009	6.01506	0.989305	0.78391	0.77924	N/A	N/A		Bound	X	X			X
11041	B4GAT1	beta-1,4-glucuronyltransferase 1	protein-coding gene	gene with protein product	N/A	N/A	N/A	N/A	N/A	N/A	N/A	N/A	N/A	N/A	N/A	N/A	N/A	N/A	N/A	7.56268	7.56268	1	0.878676	0.878676	9.34294	8.09924	0.866883	0.970484	0.908444	8.40581	7.82636	0.931066	0.92458	0.89356	N/A	N/A		Bound		X	X	X
11167	FSTL1	follistatin-like 1	protein-coding gene	gene with protein product	52.5423	42.3048	0.805156	1.72051	1.62639	9.43084	9.43084	1	0.97455	0.97455	22.2602	19.9742	0.897305	1.34753	1.30047	33.3119	33.1318	0.994594	1.5226	1.52025	45.0463	44.7733	0.99394	1.65366	1.65102	38.7373	38.5152	0.994267	1.58813	1.58563	1.7402	0.799253	Bound	Bound	X			X
11331	PHB2	prohibitin 2	protein-coding gene	gene with protein product	N/A	N/A	N/A	N/A	N/A	N/A	N/A	N/A	N/A	N/A	N/A	N/A	N/A	N/A	N/A	3.24115	3.24115	1	0.510699	0.510699	14.3784	14.2874	0.993671	1.15771	1.15495	6.82661	6.80497	0.996831	0.834205	0.832826	N/A	N/A		Bound
22872	SEC31A	SEC31 homolog A, COPII coat complex component	protein-coding gene	gene with protein product	N/A	N/A	N/A	N/A	N/A	N/A	N/A	N/A	N/A	N/A	N/A	N/A	N/A	N/A	N/A	3.96141	3.96141	1	0.59785	0.59785	18.4735	18.337	0.992611	1.26655	1.26333	8.55461	8.52294	0.996298	0.9322	0.93059	N/A	N/A		Bound				X
23013	SPEN	spen family transcriptional repressor	protein-coding gene	gene with protein product	N/A	N/A	N/A	N/A	N/A	3.0422	3.0422	1	0.483188	0.483188	N/A	N/A	N/A	N/A	N/A	14.4051	12.3044	0.854167	1.15852	1.09006	33.307	32.852	0.986338	1.52254	1.51656	21.9041	20.1053	0.917877	1.34053	1.30331	N/A	N/A		Bound
23193	GANAB	glucosidase, alpha; neutral AB	protein-coding gene	gene with protein product	13.5496	11.743	0.866667	1.13193	1.06978	3.0422	3.0422	1	0.483188	0.483188	6.42032	5.97699	0.930949	0.807557	0.776483	3.60128	3.60128	1	0.556457	0.556457	49.1414	48.9594	0.996296	1.69145	1.68984	13.3031	13.2784	0.998146	1.12395	1.12315	2.07203	1.05104	Bound	Bound	X			X
23261	CAMTA1	calmodulin binding transcription activator 1	protein-coding gene	gene with protein product	14.1518	9.18361	0.648936	1.15081	0.963013	N/A	N/A	N/A	N/A	N/A	N/A	N/A	N/A	N/A	N/A	4.32153	2.16077	0.500001	0.635638	0.334609	9.64629	9.64629	1	0.98436	0.98436	6.45653	4.56546	0.707108	0.809999	0.659484	N/A	N/A		Bound
23284	ADGRL3	adhesion G protein-coupled receptor L3	protein-coding gene	gene with protein product	8.23012	8.15484	0.990853	0.915406	0.911415	3.34643	3.34643	1	0.524582	0.524582	5.248	5.22394	0.995416	0.719994	0.717999	10.0836	10.0836	1	1.00362	1.00362	30.7286	30.6831	0.998519	1.48754	1.4869	17.6027	17.5897	0.999259	1.24558	1.24526	3.35417	1.74596	Bound	Bound	X	X	X
23294	ANKS1A	ankyrin repeat and sterile alpha motif domain containing 1A	protein-coding gene	gene with protein product	3.76377	3.3874	0.900002	0.575623	0.529866	N/A	N/A	N/A	N/A	N/A	N/A	N/A	N/A	N/A	N/A	3.96141	3.96141	1	0.59785	0.59785	8.37225	4.18612	0.499999	0.922842	0.621812	5.75899	4.07222	0.707106	0.760346	0.609831	N/A	N/A		Bound
23326	USP22	ubiquitin specific peptidase 22	protein-coding gene	gene with protein product	4.81763	4.66708	0.96875	0.682833	0.669045	N/A	N/A	N/A	N/A	N/A	N/A	N/A	N/A	N/A	N/A	7.56268	5.94211	0.785715	0.878676	0.773941	15.4705	15.4705	1	1.1895	1.1895	10.8166	9.58787	0.886406	1.03409	0.981722	N/A	N/A		Bound
23367	LARP1	La ribonucleoprotein domain family, member 1	protein-coding gene	gene with protein product	12.0441	12.0441	1	1.08077	1.08077	N/A	N/A	N/A	N/A	N/A	N/A	N/A	N/A	N/A	N/A	7.56269	7.56269	1	0.878676	0.878676	17.2905	15.0154	0.868421	1.23781	1.17654	11.4352	10.6563	0.931891	1.05824	1.02761	N/A	N/A		Bound
23370	ARHGEF18	Rho/Rac guanine nucleotide exchange factor (GEF) 18	protein-coding gene	gene with protein product	N/A	N/A	N/A	N/A	N/A	N/A	N/A	N/A	N/A	N/A	N/A	N/A	N/A	N/A	N/A	5.43193	2.31082	0.425414	0.734954	0.363766	5.46016	5.46016	1	0.737205	0.737205	5.44603	3.5521	0.652238	0.73608	0.550486	N/A	N/A		Bound
23423	TMED3	transmembrane p24 trafficking protein 3	protein-coding gene	gene with protein product	N/A	N/A	N/A	N/A	N/A	N/A	N/A	N/A	N/A	N/A	N/A	N/A	N/A	N/A	N/A	6.12217	6.12217	1	0.786905	0.786905	21.8406	15.9558	0.730556	1.33926	1.20292	11.5634	9.88353	0.854726	1.06309	0.994912	N/A	N/A		Bound	X	X			X
23468	CBX5	chromobox homolog 5	protein-coding gene	gene with protein product	N/A	N/A	N/A	N/A	N/A	N/A	N/A	N/A	N/A	N/A	N/A	N/A	N/A	N/A	N/A	3.24115	3.24115	1	0.510699	0.510699	14.9851	14.9548	0.997975	1.17566	1.17478	6.96915	6.96209	0.998987	0.84318	0.842739	N/A	N/A		Bound
23516	SLC39A14	solute carrier family 39 (zinc transporter), member 14	protein-coding gene	gene with protein product	15.1755	13.0678	0.861111	1.18114	1.1162	17.4927	17.2645	0.986955	1.24286	1.23715	16.293	15.0203	0.921888	1.212	1.17668	3.60128	3.60128	1	0.556457	0.556457	33.3069	14.7424	0.442624	1.52253	1.16857	10.9521	7.2864	0.6653	1.0395	0.862513	0.672195	-0.573048	Bound	Bound	X	X			X
23524	SRRM2	serine/arginine repetitive matrix 2	protein-coding gene	gene with protein product	3.01102	3.01102	1	0.478714	0.478714	N/A	N/A	N/A	N/A	N/A	N/A	N/A	N/A	N/A	N/A	3.60128	3.42121	0.949998	0.556457	0.53418	16.3805	16.2895	0.994445	1.21433	1.21191	7.68054	7.46523	0.971967	0.885392	0.873043	N/A	N/A		Bound
23633	KPNA6	karyopherin alpha 6 (importin alpha 7)	protein-coding gene	gene with protein product	N/A	N/A	N/A	N/A	N/A	N/A	N/A	N/A	N/A	N/A	N/A	N/A	N/A	N/A	N/A	5.04179	4.86173	0.964286	0.702585	0.686791	7.64423	5.79384	0.757936	0.883334	0.762966	6.20811	5.30736	0.854908	0.792959	0.724879	N/A	N/A		Bound
23646	PLD3	phospholipase D family, member 3	protein-coding gene	gene with protein product	11.216	10.5762	0.942953	1.04984	1.02433	3.34643	3.34643	1	0.524582	0.524582	6.12648	5.94916	0.971058	0.787211	0.774456	N/A	N/A	N/A	N/A	N/A	21.2036	21.0671	0.993562	1.32641	1.32361	N/A	N/A	N/A	N/A	N/A	N/A	N/A	Bound			X	X
23654	PLXNB2	plexin B2	protein-coding gene	gene with protein product	3.61322	3.61322	1	0.557894	0.557894	N/A	N/A	N/A	N/A	N/A	N/A	N/A	N/A	N/A	N/A	4.68166	2.34083	0.5	0.6704	0.36937	11.8303	11.7393	0.992308	1.073	1.06964	7.44216	5.24212	0.704382	0.871699	0.719507	N/A	N/A		Bound	X	X			X
23657	SLC7A11	solute carrier family 7 (anionic amino acid transporter light chain, xc- system), member 11	protein-coding gene	gene with protein product	7.82865	7.82865	1	0.893687	0.893687	3.65065	3.49854	0.958333	0.56237	0.543887	5.34599	5.23344	0.978945	0.728029	0.718787	5.40192	5.40192	1	0.732548	0.732548	13.5291	8.09924	0.598655	1.13127	0.908444	8.54886	6.61449	0.773728	0.931908	0.820496	1.59911	0.677273	Bound	Bound		X	X
23753	SDF2L1	stromal cell-derived factor 2-like 1	protein-coding gene	gene with protein product	3.91432	1.80661	0.461539	0.592656	0.256864	N/A	N/A	N/A	N/A	N/A	N/A	N/A	N/A	N/A	N/A	3.60128	3.60128	1	0.556457	0.556457	9.28228	7.40156	0.797386	0.967655	0.869323	5.7817	5.16286	0.892965	0.762056	0.71289	N/A	N/A		Bound	X	X		X
24147	FJX1	four jointed box 1	protein-coding gene	gene with protein product	8.73195	8.5814	0.982759	0.941111	0.933558	N/A	N/A	N/A	N/A	N/A	N/A	N/A	N/A	N/A	N/A	8.64307	6.12217	0.708333	0.936668	0.786905	9.10027	9.00927	0.99	0.959054	0.95469	8.86872	7.42673	0.837407	0.947861	0.870797	N/A	N/A		Bound	X			X
25777	SUN2	Sad1 and UNC84 domain containing 2	protein-coding gene	gene with protein product	7.9792	7.9792	1	0.901959	0.901959	5.17175	5.01964	0.970588	0.713638	0.700673	6.4239	6.32872	0.985184	0.807798	0.801316	3.24115	3.24115	1	0.510699	0.510699	38.0392	32.852	0.863637	1.58023	1.51656	11.1036	10.3188	0.92932	1.04547	1.01363	1.72849	0.789511	Bound	Bound		X	X
25805	BAMBI	BMP and activin membrane-bound inhibitor	protein-coding gene	gene with protein product	N/A	N/A	N/A	N/A	N/A	N/A	N/A	N/A	N/A	N/A	N/A	N/A	N/A	N/A	N/A	7.20256	7.20256	1	0.857487	0.857487	10.3743	10.2833	0.991228	1.01596	1.01213	8.64416	8.60617	0.995605	0.936723	0.93481	N/A	N/A		Bound	X	X	X
25844	YIPF3	Yip1 domain family, member 3	protein-coding gene	gene with protein product	4.51653	4.51653	1	0.654805	0.654805	3.19431	3.11826	0.976192	0.504377	0.493912	3.79832	3.75283	0.988024	0.579591	0.574359	12.2443	2.64094	0.215687	1.08793	0.421759	23.3877	21.8861	0.935797	1.36899	1.34017	16.9223	7.60263	0.449266	1.22846	0.880964	4.45523	2.1555		Bound		X	X
25849	PARM1	prostate androgen-regulated mucin-like protein 1	protein-coding gene	gene with protein product	3.31212	3.31212	1	0.520106	0.520106	N/A	N/A	N/A	N/A	N/A	N/A	N/A	N/A	N/A	N/A	7.92281	5.04179	0.636364	0.898879	0.702585	4.91415	4.91415	1	0.691448	0.691448	6.2397	4.97756	0.797724	0.795164	0.697017	N/A	N/A		Bound	X	X	X
25979	DHRS7B	dehydrogenase/reductase (SDR family) member 7B	protein-coding gene	gene with protein product	N/A	N/A	N/A	N/A	N/A	N/A	N/A	N/A	N/A	N/A	N/A	N/A	N/A	N/A	N/A	3.96141	3.96141	1	0.59785	0.59785	15.4098	13.2864	0.862205	1.1878	1.12341	7.8131	7.25485	0.92855	0.892823	0.860629	N/A	N/A		Bound		X	X
26135	SERBP1	SERPINE1 mRNA binding protein 1	protein-coding gene	gene with protein product	9.03306	9.03306	1	0.955835	0.955835	4.56331	4.10698	0.9	0.65928	0.613523	6.42033	6.09086	0.948683	0.807557	0.784679	N/A	N/A	N/A	N/A	N/A	N/A	N/A	N/A	N/A	N/A	N/A	N/A	N/A	N/A	N/A	N/A	N/A	Bound
27013	CNPPD1	cyclin Pas1/PHO80 domain containing 1	protein-coding gene	gene with protein product	N/A	N/A	N/A	N/A	N/A	N/A	N/A	N/A	N/A	N/A	N/A	N/A	N/A	N/A	N/A	5.22185	2.34083	0.448276	0.717824	0.36937	5.27816	5.27816	1	0.722483	0.722483	5.24993	3.51501	0.669534	0.720153	0.545926	N/A	N/A		Bound		X	X
27044	SND1	staphylococcal nuclease and tudor domain containing 1	protein-coding gene	gene with protein product	4.81763	4.66708	0.96875	0.682833	0.669045	3.34643	1.67321	0.499999	0.524582	0.22355	4.0152	2.79446	0.69597	0.603708	0.446298	4.86173	4.59163	0.944444	0.686791	0.661967	22.9326	14.4694	0.630954	1.36045	1.16045	10.559	8.15097	0.771946	1.02362	0.911209	2.62975	1.39493		Bound
27125	AFF4	AF4/FMR2 family, member 4	protein-coding gene	gene with protein product	N/A	N/A	N/A	N/A	N/A	N/A	N/A	N/A	N/A	N/A	N/A	N/A	N/A	N/A	N/A	9.00319	4.5016	0.500001	0.954396	0.653367	3.64011	3.64011	1	0.561115	0.561115	5.72474	4.048	0.707107	0.757755	0.607241	N/A	N/A		Bound
27173	SLC39A1	solute carrier family 39 (zinc transporter), member 1	protein-coding gene	gene with protein product	23.0845	14.3525	0.621739	1.36332	1.15693	10.6477	6.08441	0.57143	1.02726	0.784218	15.6779	9.34487	0.596054	1.19529	0.970573	20.8874	20.8874	1	1.31988	1.31988	70.0721	62.7009	0.894805	1.84555	1.79727	38.2574	36.1892	0.945941	1.58271	1.55858	2.44021	1.287	Bound	Bound		X	X
27248	ERLEC1	endoplasmic reticulum lectin 1	protein-coding gene	gene with protein product	N/A	N/A	N/A	N/A	N/A	5.47597	5.47597	1	0.738461	0.738461	N/A	N/A	N/A	N/A	N/A	3.24115	2.52089	0.777776	0.510699	0.401554	52.7057	8.577	0.162734	1.72186	0.933335	13.0701	4.64991	0.355768	1.11628	0.667445	N/A	N/A		Bound	X	X
29071	C1GALT1C1	C1GALT1-specific chaperone 1	protein-coding gene	gene with protein product	N/A	N/A	N/A	N/A	N/A	N/A	N/A	N/A	N/A	N/A	N/A	N/A	N/A	N/A	N/A	4.68166	2.28081	0.48718	0.6704	0.358089	6.7342	6.7342	1	0.828286	0.828286	5.61491	3.91911	0.697983	0.749343	0.593188	N/A	N/A		Bound		X
29927	SEC61A1	Sec61 translocon alpha 1 subunit	protein-coding gene	gene with protein product	71.1605	57.8617	0.813116	1.85224	1.76239	102.675	73.7735	0.718518	2.01146	1.8679	85.4773	65.335	0.764355	1.93185	1.81515	66.9838	60.0213	0.896057	1.82597	1.77831	214.336	201.897	0.941967	2.33109	2.30513	119.821	110.082	0.918725	2.07853	2.04172	1.40178	0.487264	Bound	Bound		X	X
29956	CERS2	ceramide synthase 2	protein-coding gene	gene with protein product	25.2926	25.142	0.994048	1.40299	1.4004	8.21396	8.21396	1	0.914553	0.914553	14.4136	14.3706	0.997019	1.15877	1.15748	8.28294	8.10288	0.978261	0.918185	0.908639	61.7604	46.29	0.749509	1.79071	1.66549	22.6177	19.367	0.85628	1.35445	1.28706	1.56919	0.650018	Bound	Bound		X	X
29967	LRP12	low density lipoprotein receptor-related protein 12	protein-coding gene	gene with protein product	N/A	N/A	N/A	N/A	N/A	3.0422	3.0422	1	0.483188	0.483188	N/A	N/A	N/A	N/A	N/A	7.92281	7.92281	1	0.898879	0.898879	18.9286	18.8376	0.995192	1.27712	1.27502	12.2461	12.2166	0.997593	1.088	1.08695	N/A	N/A		Bound	X	X	X
30000	TNPO2	transportin 2	protein-coding gene	gene with protein product	7.52755	2.40882	0.320001	0.876654	0.381804	N/A	N/A	N/A	N/A	N/A	N/A	N/A	N/A	N/A	N/A	13.5048	11.344	0.84	1.13049	1.05477	4.91415	4.91415	1	0.691448	0.691448	8.14644	7.46634	0.916515	0.910968	0.873108	N/A	N/A		Bound
50848	F11R	F11 receptor	protein-coding gene	gene with protein product	N/A	N/A	N/A	N/A	N/A	5.17175	5.01964	0.970588	0.713638	0.700673	N/A	N/A	N/A	N/A	N/A	4.32153	4.32153	1	0.635638	0.635638	14.0144	13.8324	0.987013	1.14657	1.1409	7.78227	7.73157	0.993485	0.891106	0.888268	N/A	N/A		Bound	X	X	X
50999	TMED5	transmembrane p24 trafficking protein 5	protein-coding gene	gene with protein product	3.31212	3.31212	1	0.520106	0.520106	10.0393	7.60552	0.757576	1.0017	0.881129	5.76639	5.019	0.870389	0.760904	0.700617	N/A	N/A	N/A	N/A	N/A	11.0113	8.12958	0.738292	1.04184	0.910068	N/A	N/A	N/A	N/A	N/A	N/A	N/A	Bound		X	X			X
51014	TMED7	transmembrane p24 trafficking protein 7	protein-coding gene	gene with protein product	82.2008	66.6941	0.811356	1.91488	1.82409	83.0523	61.9089	0.745421	1.91935	1.79175	82.6254	64.257	0.77769	1.91711	1.80792	98.675	91.1124	0.923358	1.99421	1.95958	304.934	224.898	0.737528	2.48421	2.35198	173.463	143.147	0.825229	2.23921	2.15578	2.09939	1.06997	Bound	Bound	X	X			X
51093	RRNAD1	ribosomal RNA adenine dimethylase domain containing 1	protein-coding gene	gene with protein product	N/A	N/A	N/A	N/A	N/A	4.56331	4.56331	1	0.65928	0.65928	N/A	N/A	N/A	N/A	N/A	4.32153	4.32153	1	0.635638	0.635638	7.37122	7.18921	0.975308	0.867539	0.856681	5.64402	5.5739	0.987577	0.751588	0.746159	N/A	N/A		Bound		X	X
51094	ADIPOR1	adiponectin receptor 1	protein-coding gene	gene with protein product	10.2375	7.82865	0.764706	1.01019	0.893687	13.3857	13.2336	0.988635	1.12664	1.12168	11.7062	10.1785	0.869491	1.06842	1.00768	12.9646	3.60128	0.277778	1.11276	0.556457	11.9214	11.6938	0.980915	1.07633	1.06796	12.432	6.48944	0.521993	1.09454	0.812207	1.062	0.0867864	Bound	Bound		X	X
51107	APH1A	APH1A gamma secretase subunit	protein-coding gene	gene with protein product	5.57038	5.49511	0.986487	0.745885	0.739976	8.31536	7.90974	0.95122	0.919881	0.898162	6.80586	6.59279	0.968693	0.832883	0.819069	3.96141	3.96141	1	0.59785	0.59785	21.9316	17.5635	0.80083	1.34107	1.24461	9.32096	8.34124	0.894891	0.96946	0.921231	1.36955	0.453701	Bound	Bound		X	X
51150	SDF4	stromal cell derived factor 4	protein-coding gene	gene with protein product	4.81763	4.81763	1	0.682833	0.682833	15.211	12.9294	0.85	1.18216	1.11158	8.56044	7.89233	0.921954	0.932496	0.897205	9.0032	5.76205	0.64	0.954397	0.760577	15.6525	12.6494	0.808139	1.19458	1.10207	11.8711	8.53735	0.719172	1.07449	0.931323	1.38674	0.471693	Bound	Bound	X			X
51249	TMEM69	transmembrane protein 69	protein-coding gene	gene with protein product	N/A	N/A	N/A	N/A	N/A	9.27872	4.86753	0.524591	0.967488	0.687309	N/A	N/A	N/A	N/A	N/A	3.78134	1.9807	0.523809	0.577646	0.296819	17.6545	9.23677	0.523196	1.24686	0.96552	8.17054	4.2773	0.523503	0.912251	0.631169	N/A	N/A		Bound		X	X
51360	MBTPS2	membrane-bound transcription factor peptidase, site 2	protein-coding gene	gene with protein product	N/A	N/A	N/A	N/A	N/A	N/A	N/A	N/A	N/A	N/A	N/A	N/A	N/A	N/A	N/A	7.68272	7.6227	0.992188	0.885515	0.882109	4.91415	4.91415	1	0.691448	0.691448	6.14443	6.12038	0.996086	0.788482	0.786779	N/A	N/A		Bound		X	X
51495	HACD3	3-hydroxyacyl-CoA dehydratase 3	protein-coding gene	gene with protein product	N/A	N/A	N/A	N/A	N/A	4.86753	3.34643	0.687501	0.687309	0.524582	N/A	N/A	N/A	N/A	N/A	8.28294	8.10287	0.97826	0.918185	0.908639	13.2864	13.1954	0.993151	1.12341	1.12042	10.4905	10.3402	0.985677	1.0208	1.01453	N/A	N/A		Bound		X	X
51643	TMBIM4	transmembrane BAX inhibitor motif containing 4	protein-coding gene	gene with protein product	4.21543	4.21543	1	0.624842	0.624842	7.75763	6.84497	0.882353	0.889729	0.835372	5.71854	5.37164	0.939337	0.757285	0.730107	N/A	N/A	N/A	N/A	N/A	N/A	N/A	N/A	N/A	N/A	N/A	N/A	N/A	N/A	N/A	N/A	N/A	Bound			X	X
51663	ZFR	zinc finger RNA binding protein	protein-coding gene	gene with protein product	N/A	N/A	N/A	N/A	N/A	N/A	N/A	N/A	N/A	N/A	N/A	N/A	N/A	N/A	N/A	5.40192	5.40192	1	0.732548	0.732548	8.55425	6.27919	0.734043	0.932182	0.797904	6.79775	5.82406	0.856763	0.832365	0.765226	N/A	N/A		Bound
51669	SARAF	store-operated calcium entry-associated regulatory factor	protein-coding gene	gene with protein product	N/A	N/A	N/A	N/A	N/A	3.0422	3.0422	1	0.483188	0.483188	N/A	N/A	N/A	N/A	N/A	14.4051	12.4244	0.862504	1.15852	1.09428	15.5615	12.9527	0.832358	1.19205	1.11236	14.9721	12.6858	0.847297	1.17528	1.10332	N/A	N/A		Bound	X	X			X
51691	LSM8	LSM8 homolog, U6 small nuclear RNA associated	protein-coding gene	gene with protein product	N/A	N/A	N/A	N/A	N/A	N/A	N/A	N/A	N/A	N/A	N/A	N/A	N/A	N/A	N/A	5.40192	5.22185	0.966666	0.732548	0.717824	6.09718	6.05168	0.992538	0.785129	0.781876	5.73903	5.62147	0.979516	0.758839	0.74985	N/A	N/A		Bound
54407	SLC38A2	solute carrier family 38, member 2	protein-coding gene	gene with protein product	N/A	N/A	N/A	N/A	N/A	7.60552	6.38863	0.839999	0.881129	0.805408	N/A	N/A	N/A	N/A	N/A	11.5241	11.344	0.984375	1.06161	1.05477	41.2242	28.408	0.68911	1.61515	1.45344	21.7961	17.9516	0.823616	1.33838	1.2541	N/A	N/A		Bound		X	X
54475	NLE1	notchless homolog 1 (Drosophila)	protein-coding gene	gene with protein product	N/A	N/A	N/A	N/A	N/A	4.25909	3.19431	0.749998	0.629317	0.504377	N/A	N/A	N/A	N/A	N/A	8.28294	6.4823	0.782609	0.918185	0.811729	3.82211	3.82211	1	0.582303	0.582303	5.62657	4.97756	0.884652	0.750244	0.697016	N/A	N/A		Bound
54504	CPVL	carboxypeptidase, vitellogenic-like	protein-coding gene	gene with protein product	N/A	N/A	N/A	N/A	N/A	N/A	N/A	N/A	N/A	N/A	N/A	N/A	N/A	N/A	N/A	5.04179	5.04179	1	0.702585	0.702585	15.3794	10.1468	0.659764	1.18694	1.00633	8.80567	7.15248	0.812259	0.944763	0.854457	N/A	N/A		Bound	X	X		X
54732	TMED9	transmembrane p24 trafficking protein 9	protein-coding gene	gene with protein product	21.6794	12.3452	0.569444	1.33605	1.0915	N/A	N/A	N/A	N/A	N/A	N/A	N/A	N/A	N/A	N/A	14.4051	10.8038	0.750001	1.15852	1.03358	72.2561	60.0618	0.831235	1.85887	1.7786	32.2623	25.4735	0.789574	1.5087	1.40609	N/A	N/A		Bound	X	X	X
54813	KLHL28	kelch-like family member 28	protein-coding gene	gene with protein product	N/A	N/A	N/A	N/A	N/A	N/A	N/A	N/A	N/A	N/A	N/A	N/A	N/A	N/A	N/A	4.68166	4.5016	0.961539	0.6704	0.653367	5.46016	5.46016	1	0.737205	0.737205	5.05595	4.95777	0.980581	0.703803	0.695286	N/A	N/A		Bound
54928	IMPAD1	inositol monophosphatase domain containing 1	protein-coding gene	gene with protein product	4.51653	4.16524	0.922221	0.654805	0.61964	N/A	N/A	N/A	N/A	N/A	N/A	N/A	N/A	N/A	N/A	4.32153	3.24115	0.750001	0.635638	0.510699	39.1312	16.5625	0.423255	1.59252	1.21913	13.0041	7.32677	0.56342	1.11408	0.864912	N/A	N/A		Bound		X	X
54929	TMEM161A	transmembrane protein 161A	protein-coding gene	gene with protein product	N/A	N/A	N/A	N/A	N/A	N/A	N/A	N/A	N/A	N/A	N/A	N/A	N/A	N/A	N/A	14.045	13.6849	0.97436	1.14752	1.13624	3.2761	1.63805	0.5	0.515357	0.214327	6.78327	4.73461	0.697983	0.831439	0.675284	N/A	N/A		Bound	X	X	X
55023	PHIP	pleckstrin homology domain interacting protein	protein-coding gene	gene with protein product	N/A	N/A	N/A	N/A	N/A	N/A	N/A	N/A	N/A	N/A	N/A	N/A	N/A	N/A	N/A	4.32153	4.32153	1	0.635638	0.635638	6.00618	5.94551	0.989899	0.778598	0.774189	5.09469	5.0689	0.994937	0.707118	0.704913	N/A	N/A		Bound
55116	TMEM39B	transmembrane protein 39B	protein-coding gene	gene with protein product	N/A	N/A	N/A	N/A	N/A	N/A	N/A	N/A	N/A	N/A	N/A	N/A	N/A	N/A	N/A	8.28294	8.28294	1	0.918185	0.918185	5.67857	5.55116	0.977563	0.754239	0.744384	6.85823	6.78085	0.988718	0.836212	0.831284	N/A	N/A		Bound		X	X
55117	SLC6A15	solute carrier family 6 (neutral amino acid transporter), member 15	protein-coding gene	gene with protein product	6.62424	6.62424	1	0.821136	0.821136	N/A	N/A	N/A	N/A	N/A	N/A	N/A	N/A	N/A	N/A	16.2058	16.2058	1	1.20967	1.20967	5.09615	5.00515	0.982143	0.707242	0.699417	9.08774	9.00623	0.991031	0.958456	0.954543	N/A	N/A		Bound		X	X
55144	LRRC8D	leucine rich repeat containing 8 family, member D	protein-coding gene	gene with protein product	N/A	N/A	N/A	N/A	N/A	N/A	N/A	N/A	N/A	N/A	N/A	N/A	N/A	N/A	N/A	4.68166	4.68166	1	0.6704	0.6704	26.9368	24.4797	0.908784	1.43035	1.38881	11.2298	10.7054	0.953301	1.05037	1.0296	N/A	N/A		Bound		X	X
55353	LAPTM4B	lysosomal protein transmembrane 4 beta	protein-coding gene	gene with protein product	N/A	N/A	N/A	N/A	N/A	N/A	N/A	N/A	N/A	N/A	N/A	N/A	N/A	N/A	N/A	3.24115	1.62058	0.500002	0.510699	0.20967	20.6576	14.4239	0.698239	1.31508	1.15908	8.18256	4.83478	0.590864	0.912889	0.684377	N/A	N/A		Bound		X	X
55362	TMEM63B	transmembrane protein 63B	protein-coding gene	gene with protein product	3.61322	3.46267	0.958334	0.557894	0.539411	N/A	N/A	N/A	N/A	N/A	N/A	N/A	N/A	N/A	N/A	3.24115	3.24115	1	0.510699	0.510699	17.8365	17.5635	0.984694	1.25131	1.24461	7.60334	7.54493	0.992318	0.881005	0.877655	N/A	N/A		Bound		X	X
55379	LRRC59	leucine rich repeat containing 59	protein-coding gene	gene with protein product	5.87149	2.10771	0.358974	0.768748	0.323811	N/A	N/A	N/A	N/A	N/A	N/A	N/A	N/A	N/A	N/A	3.96141	3.96141	1	0.59785	0.59785	20.239	19.2198	0.949641	1.30619	1.28375	8.95405	8.72567	0.974495	0.952019	0.940799	N/A	N/A		Bound		X	X
55714	TENM3	teneurin transmembrane protein 3	protein-coding gene	gene with protein product	N/A	N/A	N/A	N/A	N/A	6.84497	6.6168	0.966666	0.835372	0.820648	N/A	N/A	N/A	N/A	N/A	3.24115	3.24115	1	0.510699	0.510699	8.37225	8.28125	0.989131	0.922842	0.918096	5.2092	5.18081	0.994551	0.716771	0.714398	N/A	N/A		Bound		X	X
55734	ZFP64	ZFP64 zinc finger protein	protein-coding gene	gene with protein product	N/A	N/A	N/A	N/A	N/A	N/A	N/A	N/A	N/A	N/A	N/A	N/A	N/A	N/A	N/A	4.68166	4.68166	1	0.6704	0.6704	9.28228	6.6432	0.715686	0.967655	0.822377	6.59215	5.57685	0.845982	0.819027	0.746389	N/A	N/A		Bound
55754	TMEM30A	transmembrane protein 30A	protein-coding gene	gene with protein product	4.21543	4.21543	1	0.624842	0.624842	3.0422	3.0422	1	0.483188	0.483188	3.58109	3.58109	1	0.554015	0.554015	3.96141	1.9807	0.499999	0.59785	0.296819	15.8345	15.8345	1	1.1996	1.1996	7.92002	5.6003	0.707106	0.898727	0.748211	2.21163	1.14511		Bound		X	X
55851	PSENEN	presenilin enhancer gamma secretase subunit	protein-coding gene	gene with protein product	4.21543	2.40882	0.571429	0.624842	0.381804	19.9264	8.9745	0.450382	1.29943	0.95301	9.16506	4.64951	0.507308	0.962135	0.667407	6.12217	2.76098	0.450981	0.786905	0.441063	33.762	25.2077	0.74663	1.52843	1.40153	14.3769	8.34254	0.580272	1.15767	0.921298	1.56867	0.64954	Bound	Bound		X	X
56005	MYDGF	myeloid-derived growth factor	protein-coding gene	gene with protein product	14.754	14.6034	0.989796	1.16891	1.16446	3.0422	3.0422	1	0.483188	0.483188	6.6996	6.66533	0.994885	0.826049	0.823821	7.20256	7.0225	0.975001	0.857487	0.846492	18.2005	18.2005	1	1.26008	1.26008	11.4495	11.3055	0.987421	1.05879	1.05329	1.70898	0.773135	Bound	Bound	X			X
56034	PDGFC	platelet derived growth factor C	protein-coding gene	gene with protein product	N/A	N/A	N/A	N/A	N/A	N/A	N/A	N/A	N/A	N/A	N/A	N/A	N/A	N/A	N/A	4.68166	4.68166	1	0.6704	0.6704	9.82829	7.28022	0.740741	0.992478	0.862145	6.78327	5.83811	0.860663	0.831439	0.766272	N/A	N/A		Bound	X	X		X
56654	NPDC1	neural proliferation, differentiation and control, 1	protein-coding gene	gene with protein product	7.22645	5.72094	0.791667	0.858925	0.757467	4.86753	4.86753	1	0.687309	0.687309	5.93085	5.27701	0.889757	0.773117	0.722388	N/A	N/A	N/A	N/A	N/A	9.28227	9.10027	0.980393	0.967654	0.959054	N/A	N/A	N/A	N/A	N/A	N/A	N/A	Bound		X	X	X
56662	VTRNA1-3	vault RNA 1-3	non-coding RNA	RNA, vault	31.701	17.7583	0.560181	1.50107	1.2494	55.8092	31.8975	0.571546	1.74671	1.50376	42.0619	23.8001	0.565835	1.62389	1.37658	27.0096	16.7459	0.619998	1.43152	1.22391	168.34	106.17	0.630688	2.22619	2.026	67.4299	42.1653	0.62532	1.82885	1.62496	1.60311	0.680874	Bound	Bound
56663	VTRNA1-2	vault RNA 1-2	non-coding RNA	RNA, vault	13.399	13.399	1	1.12707	1.12707	15.3631	14.6786	0.955445	1.18648	1.16668	14.3475	14.0242	0.977469	1.15678	1.14688	19.0868	16.5659	0.867924	1.28073	1.21922	47.8674	39.1767	0.818442	1.68004	1.59303	30.2264	25.4754	0.84282	1.48039	1.40612	2.10674	1.07501	Bound	Bound
56926	NCLN	nicalin	protein-coding gene	gene with protein product	N/A	N/A	N/A	N/A	N/A	12.1688	12.1688	1	1.08525	1.08525	N/A	N/A	N/A	N/A	N/A	3.60128	3.60128	1	0.556457	0.556457	9.46428	9.37328	0.990385	0.976088	0.971892	5.83811	5.80997	0.995181	0.766272	0.764174	N/A	N/A		Bound	X	X	X
57062	DDX24	DEAD (Asp-Glu-Ala-Asp) box helicase 24	protein-coding gene	gene with protein product	N/A	N/A	N/A	N/A	N/A	N/A	N/A	N/A	N/A	N/A	N/A	N/A	N/A	N/A	N/A	6.12217	5.94211	0.970589	0.786905	0.773941	4.09512	4.04962	0.988889	0.612267	0.607414	5.0071	4.90543	0.979696	0.699586	0.690677	N/A	N/A		Bound
57171	DOLPP1	dolichyldiphosphatase 1	protein-coding gene	gene with protein product	N/A	N/A	N/A	N/A	N/A	N/A	N/A	N/A	N/A	N/A	N/A	N/A	N/A	N/A	N/A	3.60128	3.24115	0.899999	0.556457	0.510699	23.5697	23.3725	0.991635	1.37235	1.36871	9.21309	8.70367	0.944707	0.964405	0.939702	N/A	N/A		Bound		X	X
57190	SEPN1	selenoprotein N, 1	protein-coding gene	gene with protein product	4.51653	4.51653	1	0.654805	0.654805	N/A	N/A	N/A	N/A	N/A	N/A	N/A	N/A	N/A	N/A	9.36333	9.18326	0.980769	0.97143	0.962997	3.82211	3.82211	1	0.582303	0.582303	5.98228	5.92448	0.990338	0.776867	0.77265	N/A	N/A		Bound	X			X
57216	VANGL2	VANGL planar cell polarity protein 2	protein-coding gene	gene with protein product	N/A	N/A	N/A	N/A	N/A	3.65065	3.65065	1	0.56237	0.56237	N/A	N/A	N/A	N/A	N/A	6.4823	6.4823	1	0.811729	0.811729	8.91827	4.4288	0.496599	0.950281	0.646286	7.60335	5.35806	0.704697	0.881005	0.729008	N/A	N/A		Bound		X	X
57488	ESYT2	extended synaptotagmin-like protein 2	protein-coding gene	gene with protein product	N/A	N/A	N/A	N/A	N/A	N/A	N/A	N/A	N/A	N/A	N/A	N/A	N/A	N/A	N/A	7.92281	7.92281	1	0.898879	0.898879	24.783	20.0358	0.808447	1.39415	1.30181	14.0125	12.5992	0.899137	1.14652	1.10034	N/A	N/A		Bound		X	X
57515	SERINC1	serine incorporator 1	protein-coding gene	gene with protein product	7.22645	7.07589	0.979165	0.858925	0.849781	10.0393	10.0393	1	1.0017	1.0017	8.51753	8.42834	0.989528	0.930314	0.925742	9.0032	9.0032	1	0.954397	0.954397	23.3877	23.2967	0.996109	1.36899	1.36729	14.5108	14.4826	0.998053	1.16169	1.16085	1.70364	0.768621	Bound	Bound		X	X
57655	GRAMD1A	GRAM domain containing 1A	protein-coding gene	gene with protein product	N/A	N/A	N/A	N/A	N/A	3.65065	1.82532	0.499999	0.56237	0.261339	N/A	N/A	N/A	N/A	N/A	4.68166	4.5016	0.961539	0.6704	0.653367	25.8448	25.6628	0.992958	1.41237	1.4093	10.9998	10.7482	0.977122	1.04139	1.03134	N/A	N/A		Bound		X	X
58477	SRPRB	signal recognition particle receptor, B subunit	protein-coding gene	gene with protein product	11.4419	11.4419	1	1.0585	1.0585	N/A	N/A	N/A	N/A	N/A	N/A	N/A	N/A	N/A	N/A	3.96141	3.96141	1	0.59785	0.59785	16.5625	10.0103	0.604395	1.21913	1.00045	8.10005	6.29721	0.777429	0.908488	0.799148	N/A	N/A		Bound		X	X
58505	OSTC	oligosaccharyltransferase complex subunit (non-catalytic)	protein-coding gene	gene with protein product	4.21543	4.21543	1	0.624842	0.624842	5.17175	5.17175	1	0.713638	0.713638	4.66917	4.66917	1	0.66924	0.66924	20.0951	19.9751	0.994026	1.30309	1.30049	19.7172	19.4745	0.987692	1.29485	1.28947	19.9053	19.7232	0.990854	1.29897	1.29498	4.26313	2.09191		Bound		X	X
60681	FKBP10	FK506 binding protein 10, 65 kDa	protein-coding gene	gene with protein product	3.01102	3.01102	1	0.478714	0.478714	N/A	N/A	N/A	N/A	N/A	N/A	N/A	N/A	N/A	N/A	12.2443	12.0643	0.985294	1.08794	1.0815	10.1923	10.1013	0.991071	1.00827	1.00438	11.1713	11.0392	0.988178	1.0481	1.04294	N/A	N/A		Bound	X			X
64093	SMOC1	SPARC related modular calcium binding 1	protein-coding gene	gene with protein product	N/A	N/A	N/A	N/A	N/A	N/A	N/A	N/A	N/A	N/A	N/A	N/A	N/A	N/A	N/A	3.60128	3.60128	1	0.556457	0.556457	10.1923	10.0103	0.982142	1.00827	1.00045	6.05849	6.00415	0.991031	0.782365	0.778452	N/A	N/A		Bound	X			X
64764	CREB3L2	cAMP responsive element binding protein 3-like 2	protein-coding gene	gene with protein product	15.6573	15.6573	1	1.19472	1.19472	N/A	N/A	N/A	N/A	N/A	N/A	N/A	N/A	N/A	N/A	3.96141	3.96141	1	0.59785	0.59785	51.4165	43.9695	0.855162	1.7111	1.64315	14.2717	13.1978	0.92475	1.15448	1.1205	N/A	N/A		Bound		X	X
78992	YIPF2	Yip1 domain family, member 2	protein-coding gene	gene with protein product	3.31212	3.31212	1	0.520106	0.520106	3.95487	3.95487	1	0.597132	0.597132	3.61925	3.61925	1	0.558619	0.558619	6.4823	3.24115	0.5	0.811729	0.510699	25.2987	17.0175	0.672662	1.4031	1.2309	12.806	7.42673	0.579941	1.10741	0.870798	3.5383	1.82306		Bound		X	X
79073	TMEM109	transmembrane protein 109	protein-coding gene	gene with protein product	48.628	42.5307	0.874613	1.68689	1.6287	58.2582	47.1035	0.80853	1.76536	1.67305	53.2257	44.7587	0.840923	1.72612	1.65088	73.286	58.3407	0.796069	1.86502	1.76597	198.567	132.317	0.66636	2.29791	2.12162	120.633	87.8606	0.728333	2.08146	1.94379	2.26643	1.18042	Bound	Bound	X	X	X
79102	RNF26	ring finger protein 26	protein-coding gene	gene with protein product	N/A	N/A	N/A	N/A	N/A	N/A	N/A	N/A	N/A	N/A	N/A	N/A	N/A	N/A	N/A	3.96141	3.96141	1	0.59785	0.59785	31.669	19.7476	0.623562	1.50063	1.29551	11.2006	8.84467	0.78966	1.04924	0.946682	N/A	N/A		Bound		X	X
79134	TMEM185B	transmembrane protein 185B	protein-coding gene	gene with protein product	N/A	N/A	N/A	N/A	N/A	N/A	N/A	N/A	N/A	N/A	N/A	N/A	N/A	N/A	N/A	4.68166	4.5016	0.961539	0.6704	0.653367	30.9409	26.0268	0.841176	1.49053	1.41542	12.0356	10.8241	0.899346	1.08047	1.03439	N/A	N/A		Bound		X
79139	DERL1	derlin 1	protein-coding gene	gene with protein product	6.02204	6.02204	1	0.779744	0.779744	6.69285	6.69285	1	0.825611	0.825611	6.34859	6.34859	1	0.802677	0.802677	3.96141	1.32047	0.333333	0.59785	0.120729	8.73626	8.73626	1	0.941326	0.941326	5.88285	3.39646	0.57735	0.769588	0.531027	0.926638	-0.109922		Bound	X	X	X
79143	MBOAT7	membrane bound O-acyltransferase domain containing 7	protein-coding gene	gene with protein product	4.51653	4.51653	1	0.654805	0.654805	12.1688	10.3435	0.85	1.08525	1.01467	7.41356	6.83497	0.921955	0.870027	0.834736	3.60128	3.60128	1	0.556457	0.556457	42.4072	31.9298	0.752933	1.62744	1.5042	12.358	10.7232	0.867717	1.09195	1.03033	1.66695	0.737207	Bound	Bound		X	X
79586	CHPF	chondroitin polymerizing factor	protein-coding gene	gene with protein product	5.41983	5.41983	1	0.733986	0.733986	7.90974	7.75763	0.980769	0.898162	0.889729	6.54748	6.48421	0.990338	0.816074	0.811857	7.92281	7.92281	1	0.898879	0.898879	6.37019	6.37019	1	0.804152	0.804152	7.10421	7.10421	1	0.851516	0.851516	1.08503	0.117735	Bound			X		X
79720	VPS37B	vacuolar protein sorting 37 homolog B (S. cerevisiae)	protein-coding gene	gene with protein product	N/A	N/A	N/A	N/A	N/A	N/A	N/A	N/A	N/A	N/A	N/A	N/A	N/A	N/A	N/A	10.4437	7.38262	0.706897	1.01885	0.868211	3.82211	1.91106	0.500001	0.582303	0.281274	6.31799	3.75615	0.594516	0.800579	0.574742	N/A	N/A		Bound				X
79770	TXNDC15	thioredoxin domain containing 15	protein-coding gene	gene with protein product	3.91432	3.91432	1	0.592656	0.592656	N/A	N/A	N/A	N/A	N/A	N/A	N/A	N/A	N/A	N/A	3.96141	3.96141	1	0.59785	0.59785	16.0165	15.8345	0.988636	1.20457	1.1996	7.96542	7.92003	0.994302	0.901208	0.898727	N/A	N/A		Bound	X	X			X
79966	SCD5	stearoyl-CoA desaturase 5	protein-coding gene	gene with protein product	4.21543	4.21543	1	0.624842	0.624842	14.2984	11.7125	0.819149	1.15529	1.06865	7.76362	7.02661	0.905069	0.890064	0.846746	N/A	N/A	N/A	N/A	N/A	5.27816	5.27816	1	0.722483	0.722483	N/A	N/A	N/A	N/A	N/A	N/A	N/A	Bound			X	X
79971	WLS	wntless Wnt ligand secretion mediator	protein-coding gene	gene with protein product	N/A	N/A	N/A	N/A	N/A	3.65065	3.65065	1	0.56237	0.56237	N/A	N/A	N/A	N/A	N/A	3.96141	3.96141	1	0.59785	0.59785	11.4663	9.43394	0.822751	1.05942	0.974693	6.73965	6.11324	0.907056	0.828637	0.786271	N/A	N/A		Bound	X	X	X
80031	SEMA6D	sema domain, transmembrane domain (TM), and cytoplasmic domain, (semaphorin) 6D	protein-coding gene	gene with protein product	N/A	N/A	N/A	N/A	N/A	N/A	N/A	N/A	N/A	N/A	N/A	N/A	N/A	N/A	N/A	3.96141	1.9807	0.499999	0.59785	0.296819	9.82829	6.55219	0.666666	0.992478	0.816386	6.2397	3.60249	0.577349	0.795164	0.556603	N/A	N/A		Bound	X	X			X
80139	ZNF703	zinc finger protein 703	protein-coding gene	gene with protein product	N/A	N/A	N/A	N/A	N/A	6.08441	1.82532	0.3	0.784218	0.261339	N/A	N/A	N/A	N/A	N/A	3.96141	3.78134	0.954544	0.59785	0.577646	7.09821	7.09821	1	0.851149	0.851149	5.30273	5.18081	0.977008	0.724499	0.714397	N/A	N/A		Bound
80213	TM2D3	TM2 domain containing 3	protein-coding gene	gene with protein product	N/A	N/A	N/A	N/A	N/A	4.56331	4.56331	1	0.65928	0.65928	N/A	N/A	N/A	N/A	N/A	3.24115	3.24115	1	0.510699	0.510699	14.9245	11.2843	0.756098	1.1739	1.05248	6.95503	6.04766	0.869539	0.842299	0.781588	N/A	N/A		Bound	X	X			X
80346	REEP4	receptor accessory protein 4	protein-coding gene	gene with protein product	N/A	N/A	N/A	N/A	N/A	3.34643	3.34643	1	0.524582	0.524582	N/A	N/A	N/A	N/A	N/A	11.8842	9.0032	0.757576	1.07497	0.954397	30.9409	21.4766	0.694119	1.49053	1.33197	19.1757	13.9053	0.725154	1.28275	1.14318	N/A	N/A		Bound		X	X
80727	TTYH3	tweety family member 3	protein-coding gene	gene with protein product	3.61322	3.61322	1	0.557894	0.557894	3.0422	1.5211	0.5	0.483188	0.182158	3.31544	2.34437	0.707107	0.520541	0.370026	5.76204	2.88102	0.5	0.760576	0.459546	21.1126	18.5646	0.87931	1.32454	1.26868	11.0296	7.31333	0.663065	1.04256	0.864115	3.32674	1.73411		Bound		X	X
81490	PTDSS2	phosphatidylserine synthase 2	protein-coding gene	gene with protein product	N/A	N/A	N/A	N/A	N/A	N/A	N/A	N/A	N/A	N/A	N/A	N/A	N/A	N/A	N/A	4.68166	4.68166	1	0.6704	0.6704	6.9162	3.4581	0.5	0.839868	0.538838	5.69028	4.02364	0.707107	0.755134	0.604619	N/A	N/A		Bound		X	X
81502	HM13	histocompatibility (minor) 13	protein-coding gene	gene with protein product	29.508	16.5606	0.561224	1.46994	1.21908	11.2562	7.75761	0.689187	1.05139	0.889728	18.2249	11.3345	0.621923	1.26067	1.0544	28.4501	10.7438	0.377637	1.45408	1.03116	55.7846	34.1716	0.612562	1.74651	1.53366	39.8382	19.1607	0.480964	1.6003	1.28241	2.18592	1.12824	Bound	Bound	X	X	X
81539	SLC38A1	solute carrier family 38, member 1	protein-coding gene	gene with protein product	3.61322	3.61322	1	0.557894	0.557894	4.25909	2.12954	0.499999	0.629317	0.328286	3.92289	2.7739	0.707106	0.593606	0.44309	18.7266	18.5466	0.990384	1.27246	1.26826	37.3111	34.49	0.92439	1.57184	1.53769	26.4332	25.2917	0.956818	1.42215	1.40298	6.73819	2.75236		Bound		X	X
81559	TRIM11	tripartite motif containing 11	protein-coding gene	gene with protein product	8.43085	8.2803	0.982143	0.925871	0.918046	N/A	N/A	N/A	N/A	N/A	N/A	N/A	N/A	N/A	N/A	6.84243	6.84243	1	0.83521	0.83521	5.36916	5.32366	0.991526	0.729906	0.72621	6.0612	6.03546	0.995754	0.782558	0.78071	N/A	N/A		Bound
81618	ITM2C	integral membrane protein 2C	protein-coding gene	gene with protein product	7.82865	7.82865	1	0.893687	0.893687	3.65065	3.49854	0.958333	0.56237	0.543887	5.34599	5.23344	0.978945	0.728029	0.718787	13.6849	9.72344	0.710525	1.13624	0.98782	26.9368	22.7203	0.843469	1.43035	1.35641	19.1996	14.8634	0.774149	1.28329	1.17212	3.59141	1.84455	Bound	Bound		X	X
81671	VMP1	vacuole membrane protein 1	protein-coding gene	gene with protein product	9.33416	4.21543	0.451613	0.970075	0.624842	N/A	N/A	N/A	N/A	N/A	N/A	N/A	N/A	N/A	N/A	9.36332	7.02249	0.75	0.97143	0.846491	3.82211	3.82211	1	0.582303	0.582303	5.98228	5.1808	0.866025	0.776867	0.714397	N/A	N/A		Bound		X	X
84065	TMEM222	transmembrane protein 222	protein-coding gene	gene with protein product	8.43085	5.41983	0.642857	0.925871	0.733986	3.34643	3.34643	1	0.524582	0.524582	5.31161	4.25877	0.801784	0.725227	0.629284	12.2443	8.28294	0.676473	1.08793	0.918185	3.82211	3.82211	1	0.582303	0.582303	6.84098	5.62657	0.82248	0.835119	0.750244	1.28793	0.365053	Bound	Bound		X	X
84105	PCBD2	pterin-4 alpha-carbinolamine dehydratase/dimerization cofactor of hepatocyte nuclear factor 1 alpha (TCF1) 2	protein-coding gene	gene with protein product	52.0404	13.3488	0.256509	1.71634	1.12544	13.2691	5.72948	0.431791	1.12284	0.758115	26.2779	8.74539	0.332804	1.41959	0.941779	9.72345	4.5016	0.462963	0.98782	0.653367	72.1347	38.6913	0.536376	1.85814	1.58761	26.4839	13.1975	0.498319	1.42298	1.12049	1.00784	0.0112669	Bound	Bound
84133	ZNRF3	zinc and ring finger 3	protein-coding gene	gene with protein product	N/A	N/A	N/A	N/A	N/A	N/A	N/A	N/A	N/A	N/A	N/A	N/A	N/A	N/A	N/A	13.3247	13.3247	1	1.12466	1.12466	9.28228	7.09821	0.764705	0.967655	0.851149	11.1213	9.72531	0.874474	1.04616	0.987904	N/A	N/A		Bound	X	X	X
84447	SYVN1	synovial apoptosis inhibitor 1, synoviolin	protein-coding gene	gene with protein product	4.81763	4.81763	1	0.682833	0.682833	36.5065	22.056	0.604167	1.56237	1.34353	13.2618	10.3081	0.777282	1.1226	1.01318	32.0514	21.6077	0.674158	1.50585	1.33461	69.617	63.7929	0.91634	1.84272	1.80477	47.2368	37.127	0.785976	1.67428	1.56969	3.56188	1.83264	Bound	Bound	X	X	X
84513	PPAPDC1B	phosphatidic acid phosphatase type 2 domain containing 1B	protein-coding gene	gene with protein product	14.5533	6.87516	0.472412	1.16296	0.837283	3.0422	3.0422	1	0.483188	0.483188	6.65387	4.57336	0.687323	0.823075	0.660235	5.40192	2.52089	0.466666	0.732548	0.401554	5.27816	5.27816	1	0.722483	0.722483	5.33968	3.64769	0.683129	0.727515	0.562018	0.802492	-0.317441	Bound	Bound		X	X
84522	JAGN1	jagunal homolog 1	protein-coding gene	gene with protein product	12.0441	7.22645	0.6	1.08077	0.858925	N/A	N/A	N/A	N/A	N/A	N/A	N/A	N/A	N/A	N/A	16.3858	8.82313	0.538463	1.21447	0.945623	16.7445	13.7111	0.818841	1.22387	1.13707	16.5642	10.9989	0.664015	1.21917	1.04135	N/A	N/A		Bound		X	X
84720	PIGO	phosphatidylinositol glycan anchor biosynthesis, class O	protein-coding gene	gene with protein product	N/A	N/A	N/A	N/A	N/A	N/A	N/A	N/A	N/A	N/A	N/A	N/A	N/A	N/A	N/A	3.60128	3.42121	0.949998	0.556457	0.53418	8.55425	8.55425	1	0.932182	0.932182	5.55034	5.4098	0.974679	0.744319	0.733181	N/A	N/A		Bound		X	X
84726	PRRC2B	proline-rich coiled-coil 2B	protein-coding gene	gene with protein product	N/A	N/A	N/A	N/A	N/A	N/A	N/A	N/A	N/A	N/A	N/A	N/A	N/A	N/A	N/A	11.5241	11.5241	1	1.06161	1.06161	25.4808	21.7496	0.853571	1.40621	1.33745	17.136	15.8318	0.923889	1.23391	1.19953	N/A	N/A		Bound
84790	TUBA1C	tubulin, alpha 1c	protein-coding gene	gene with protein product	N/A	N/A	N/A	N/A	N/A	N/A	N/A	N/A	N/A	N/A	N/A	N/A	N/A	N/A	N/A	4.32153	4.32153	1	0.635638	0.635638	13.0285	3.48086	0.267172	1.1149	0.541687	7.50355	3.87848	0.516887	0.875267	0.588662	N/A	N/A		Bound
84803	GPAT3	glycerol-3-phosphate acyltransferase 3	protein-coding gene	gene with protein product	3.01102	3.01102	1	0.478714	0.478714	4.25909	4.25909	1	0.629317	0.629317	3.58109	3.58109	1	0.554015	0.554015	5.04179	5.04179	1	0.702585	0.702585	20.3846	10.1923	0.5	1.3093	1.00827	10.1378	7.1685	0.707107	1.00594	0.855428	2.83092	1.50127		Bound		X	X
84885	ZDHHC12	zinc finger, DHHC-type containing 12	protein-coding gene	gene with protein product	3.61322	3.61322	1	0.557894	0.557894	9.73506	7.60551	0.781249	0.988339	0.881128	5.93084	5.24217	0.883883	0.773117	0.719511	N/A	N/A	N/A	N/A	N/A	17.4726	17.3816	0.994791	1.24236	1.24009	N/A	N/A	N/A	N/A	N/A	N/A	N/A	Bound			X	X
84918	LRP11	low density lipoprotein receptor-related protein 11	protein-coding gene	gene with protein product	12.9474	10.7644	0.831395	1.11218	1.03199	14.9068	13.3857	0.897959	1.17338	1.12664	13.8926	12.0037	0.864037	1.14278	1.07932	12.9646	8.28294	0.638889	1.11276	0.918185	43.8633	37.6751	0.858921	1.6421	1.57605	23.8468	17.6652	0.74078	1.37743	1.24712	1.71651	0.77948	Bound	Bound	X	X			X
84919	PPP1R15B	protein phosphatase 1, regulatory subunit 15B	protein-coding gene	gene with protein product	N/A	N/A	N/A	N/A	N/A	N/A	N/A	N/A	N/A	N/A	N/A	N/A	N/A	N/A	N/A	3.60128	3.42121	0.949998	0.556457	0.53418	8.19024	8.19024	1	0.913297	0.913297	5.43096	5.29344	0.974679	0.734877	0.723738	N/A	N/A		Bound
85495	RPPH1	ribonuclease P RNA component H1	non-coding RNA	RNA, misc	22.2815	11.1408	0.500002	1.34794	1.04692	4.56331	4.4112	0.966667	0.65928	0.644557	10.0835	7.0103	0.695223	1.00361	0.845737	11.5241	6.4823	0.562499	1.06161	0.811729	50.0515	17.5635	0.350909	1.69942	1.24461	24.0166	10.6701	0.444282	1.38051	1.02817	2.38177	1.25203	Bound	Bound
90522	YIF1B	Yip1 interacting factor homolog B (S. cerevisiae)	protein-coding gene	gene with protein product	13.8507	12.1946	0.880435	1.14147	1.08617	N/A	N/A	N/A	N/A	N/A	N/A	N/A	N/A	N/A	N/A	3.60128	3.60128	1	0.556457	0.556457	23.9337	21.2643	0.888467	1.37901	1.32765	9.28396	8.75093	0.942585	0.967733	0.942054	N/A	N/A		Bound		X	X
91304	TMEM259	transmembrane protein 259	protein-coding gene	gene with protein product	41.8532	26.3464	0.629496	1.62173	1.42072	26.6193	23.0447	0.865714	1.4252	1.36257	33.3782	24.6403	0.738216	1.52346	1.39165	12.9646	12.6045	0.972223	1.11276	1.10052	55.997	45.3193	0.809318	1.74816	1.65628	26.944	23.9003	0.887038	1.43046	1.3784	0.807234	-0.308942	Bound	Bound		X	X
91663	MYADM	myeloid-associated differentiation marker	protein-coding gene	gene with protein product	N/A	N/A	N/A	N/A	N/A	N/A	N/A	N/A	N/A	N/A	N/A	N/A	N/A	N/A	N/A	3.24115	3.24115	1	0.510699	0.510699	18.0185	17.7455	0.984848	1.25572	1.24909	7.64204	7.58393	0.992395	0.883209	0.879894	N/A	N/A		Bound		X	X
91869	RFT1	RFT1 homolog	protein-coding gene	gene with protein product	8.88251	8.50612	0.957626	0.948536	0.929732	6.84496	1.21688	0.177778	0.835371	0.0852478	7.79746	3.21729	0.412607	0.891953	0.50749	N/A	N/A	N/A	N/A	N/A	N/A	N/A	N/A	N/A	N/A	N/A	N/A	N/A	N/A	N/A	N/A	N/A	Bound			X	X
92140	MTDH	metadherin	protein-coding gene	gene with protein product	32.4286	27.882	0.859795	1.51093	1.44532	12.7773	12.7773	1	1.10644	1.10644	20.3556	18.8747	0.927251	1.30868	1.27588	36.1328	33.3719	0.923589	1.5579	1.52338	62.6857	56.2169	0.896807	1.79717	1.74987	47.5921	43.3136	0.910099	1.67754	1.63662	2.33804	1.2253	Bound	Bound		X	X
93183	PIGM	phosphatidylinositol glycan anchor biosynthesis, class M	protein-coding gene	gene with protein product	9.63526	5.41983	0.5625	0.983863	0.733986	3.34643	3.34643	1	0.524582	0.524582	5.67836	4.25877	0.75	0.754223	0.629284	16.5659	11.7042	0.706522	1.21921	1.06834	9.46428	7.28021	0.76923	0.976088	0.862144	12.5213	9.23086	0.73721	1.09765	0.965242	2.2051	1.14084	Bound	Bound		X	X
94005	PIGS	phosphatidylinositol glycan anchor biosynthesis, class S	protein-coding gene	gene with protein product	3.01102	3.01102	1	0.478714	0.478714	N/A	N/A	N/A	N/A	N/A	N/A	N/A	N/A	N/A	N/A	4.32153	4.32153	1	0.635638	0.635638	34.945	22.0226	0.630208	1.54338	1.34287	12.2888	9.75558	0.793857	1.08951	0.989253	N/A	N/A		Bound		X	X
112939	NACC1	nucleus accumbens associated 1, BEN and BTB (POZ) domain containing	protein-coding gene	gene with protein product	N/A	N/A	N/A	N/A	N/A	N/A	N/A	N/A	N/A	N/A	N/A	N/A	N/A	N/A	N/A	9.00319	9.00319	1	0.954396	0.954396	8.00824	5.42982	0.678029	0.903537	0.734785	8.49115	6.99183	0.823425	0.928967	0.844591	N/A	N/A		Bound
113251	LARP4	La ribonucleoprotein domain family, member 4	protein-coding gene	gene with protein product	11.1408	8.73196	0.783784	1.04692	0.941112	3.0422	3.0422	1	0.483188	0.483188	5.82172	5.15406	0.885316	0.765051	0.71215	5.04179	5.04179	1	0.702585	0.702585	4.27713	4.23163	0.989362	0.631152	0.626508	4.64375	4.61898	0.994667	0.666869	0.664546	0.797659	-0.326156	Bound
113419	TEX261	testis expressed 261	protein-coding gene	gene with protein product	4.21543	4.06488	0.964286	0.624842	0.609048	N/A	N/A	N/A	N/A	N/A	N/A	N/A	N/A	N/A	N/A	7.92281	7.74275	0.977273	0.898879	0.888895	8.91827	6.21852	0.697279	0.950281	0.793687	8.40582	6.93891	0.825489	0.92458	0.841291	N/A	N/A		Bound		X	X
114908	TMEM123	transmembrane protein 123	protein-coding gene	gene with protein product	N/A	N/A	N/A	N/A	N/A	3.34643	3.34643	1	0.524582	0.524582	N/A	N/A	N/A	N/A	N/A	3.60128	3.60128	1	0.556457	0.556457	13.1044	12.9224	0.986111	1.11742	1.11134	6.86969	6.82181	0.993031	0.836937	0.8339	N/A	N/A		Bound	X	X	X
116987	AGAP1	ArfGAP with GTPase domain, ankyrin repeat and PH domain 1	protein-coding gene	gene with protein product	N/A	N/A	N/A	N/A	N/A	N/A	N/A	N/A	N/A	N/A	N/A	N/A	N/A	N/A	N/A	12.2444	12.2444	1	1.08794	1.08794	5.00515	4.86864	0.972726	0.699417	0.687408	7.82846	7.72097	0.986269	0.893676	0.887672	N/A	N/A		Bound
118987	PDZD8	PDZ domain containing 8	protein-coding gene	gene with protein product	15.3562	8.73195	0.568627	1.18628	0.941111	5.78019	5.78019	1	0.761942	0.761942	9.42134	7.10439	0.754074	0.974113	0.851527	10.8038	10.8038	1	1.03358	1.03358	6.00618	5.82417	0.969696	0.778598	0.765234	8.05542	7.93243	0.984732	0.906088	0.899406	0.855018	-0.225973	Bound	Bound				X
121227	LRIG3	leucine-rich repeats and immunoglobulin-like domains 3	protein-coding gene	gene with protein product	4.21543	4.06488	0.964286	0.624842	0.609048	15.8194	4.25908	0.269231	1.19919	0.629316	8.16614	4.16085	0.509525	0.912017	0.619182	N/A	N/A	N/A	N/A	N/A	N/A	N/A	N/A	N/A	N/A	N/A	N/A	N/A	N/A	N/A	N/A	N/A	Bound		X	X	X
121260	SLC15A4	solute carrier family 15 (oligopeptide transporter), member 4	protein-coding gene	gene with protein product	N/A	N/A	N/A	N/A	N/A	N/A	N/A	N/A	N/A	N/A	N/A	N/A	N/A	N/A	N/A	6.4823	5.40192	0.833334	0.811729	0.732548	23.2057	22.9782	0.990196	1.36559	1.36132	12.2648	11.1412	0.908385	1.08866	1.04693	N/A	N/A		Bound		X	X
125050	RN7SK	RNA, 7SK small nuclear	non-coding RNA	RNA, small nuclear	N/A	N/A	N/A	N/A	N/A	N/A	N/A	N/A	N/A	N/A	N/A	N/A	N/A	N/A	N/A	7.14253	3.48124	0.487396	0.853852	0.541734	17.0569	8.22007	0.481919	1.2319	0.914876	11.0376	5.3494	0.48465	1.04288	0.728305	N/A	N/A		Bound
126792	B3GALT6	UDP-Gal:betaGal beta 1,3-galactosyltransferase polypeptide 6	protein-coding gene	gene with protein product	3.01102	2.70992	0.900001	0.478714	0.432956	3.0422	3.0422	1	0.483188	0.483188	3.02657	2.87126	0.948684	0.480951	0.458072	4.32153	4.14147	0.958334	0.635638	0.617155	22.5687	21.8406	0.967739	1.35351	1.33926	9.8758	9.51064	0.963025	0.994572	0.97821	3.26303	1.70621		Bound		X		X
130074	FAM168B	family with sequence similarity 168, member B	protein-coding gene	gene with protein product	N/A	N/A	N/A	N/A	N/A	N/A	N/A	N/A	N/A	N/A	N/A	N/A	N/A	N/A	N/A	3.96141	3.78134	0.954544	0.59785	0.577646	10.7383	10.7383	1	1.03094	1.03094	6.52218	6.37222	0.977008	0.814393	0.804291	N/A	N/A		Bound		X
148867	SLC30A7	solute carrier family 30 (zinc transporter), member 7	protein-coding gene	gene with protein product	N/A	N/A	N/A	N/A	N/A	3.0422	3.0422	1	0.483188	0.483188	N/A	N/A	N/A	N/A	N/A	3.24115	3.24115	1	0.510699	0.510699	8.55425	6.8252	0.797872	0.932182	0.834115	5.26551	4.70335	0.893237	0.721441	0.672407	N/A	N/A		Bound		X	X
149013	NBPF12	neuroblastoma breakpoint family, member 12	protein-coding gene	gene with protein product	7.27663	6.17259	0.848276	0.86193	0.790467	8.36607	5.01964	0.6	0.922521	0.700673	7.80236	5.56634	0.713418	0.892226	0.74557	3.96141	1.9807	0.499999	0.59785	0.296819	21.9013	14.2571	0.650969	1.34047	1.15403	9.31451	5.31404	0.570512	0.96916	0.725425	1.19381	0.25557	Bound	Bound
155066	ATP6V0E2	ATPase, H+ transporting V0 subunit e2	protein-coding gene	gene with protein product	N/A	N/A	N/A	N/A	N/A	N/A	N/A	N/A	N/A	N/A	N/A	N/A	N/A	N/A	N/A	14.045	10.9839	0.782052	1.14752	1.04076	26.2088	26.2088	1	1.41845	1.41845	19.186	16.9669	0.884337	1.28298	1.2296	N/A	N/A		Bound		X	X
160418	TMTC3	transmembrane and tetratricopeptide repeat containing 3	protein-coding gene	gene with protein product	N/A	N/A	N/A	N/A	N/A	4.86753	4.86753	1	0.687309	0.687309	N/A	N/A	N/A	N/A	N/A	9.54339	9.54339	1	0.979703	0.979703	27.4828	24.3887	0.887417	1.43906	1.38719	16.195	15.2562	0.942028	1.20938	1.18345	N/A	N/A		Bound		X	X
169792	GLIS3	GLIS family zinc finger 3	protein-coding gene	gene with protein product	N/A	N/A	N/A	N/A	N/A	N/A	N/A	N/A	N/A	N/A	N/A	N/A	N/A	N/A	N/A	4.68166	2.34083	0.5	0.6704	0.36937	7.82623	7.82623	1	0.893553	0.893553	6.05308	4.28017	0.707107	0.781976	0.631461	N/A	N/A		Bound				X
171023	ASXL1	additional sex combs like transcriptional regulator 1	protein-coding gene	gene with protein product	N/A	N/A	N/A	N/A	N/A	N/A	N/A	N/A	N/A	N/A	N/A	N/A	N/A	N/A	N/A	6.12217	3.06109	0.500001	0.786905	0.485876	5.27816	5.27816	1	0.722483	0.722483	5.68452	4.01957	0.707107	0.754694	0.604179	N/A	N/A		Bound
197335	WDR90	WD repeat domain 90	protein-coding gene	gene with protein product	3.01102	1.50551	0.5	0.478714	0.177684	N/A	N/A	N/A	N/A	N/A	N/A	N/A	N/A	N/A	N/A	6.12217	6.12217	1	0.786905	0.786905	5.27816	5.18715	0.982757	0.722483	0.714929	5.68452	5.6353	0.991341	0.754694	0.750917	N/A	N/A		Bound				X
199953	TMEM201	transmembrane protein 201	protein-coding gene	gene with protein product	N/A	N/A	N/A	N/A	N/A	N/A	N/A	N/A	N/A	N/A	N/A	N/A	N/A	N/A	N/A	6.84243	6.84243	1	0.83521	0.83521	11.1933	11.1023	0.99187	1.04896	1.04541	8.75155	8.7159	0.995927	0.942085	0.940312	N/A	N/A		Bound		X	X
201595	STT3B	STT3B, subunit of the oligosaccharyltransferase complex (catalytic)	protein-coding gene	gene with protein product	10.8397	10.8397	1	1.03502	1.03502	8.51818	8.21396	0.964286	0.930347	0.914553	9.60909	9.43593	0.981981	0.982682	0.974785	16.0257	11.344	0.707865	1.20482	1.05477	40.9815	40.7843	0.995188	1.61259	1.61049	25.6273	21.5095	0.839321	1.4087	1.33263	2.66698	1.41521	Bound	Bound		X	X
205428	C3orf58	chromosome 3 open reading frame 58	protein-coding gene	gene with protein product	4.51653	4.21543	0.933334	0.654805	0.624842	N/A	N/A	N/A	N/A	N/A	N/A	N/A	N/A	N/A	N/A	8.28294	7.56268	0.913043	0.918185	0.878676	3.82211	1.2437	0.325396	0.582303	0.0947156	5.62657	3.06687	0.545069	0.750244	0.486696	N/A	N/A		Bound	X			X
221079	ARL5B	ADP-ribosylation factor-like 5B	protein-coding gene	gene with protein product	N/A	N/A	N/A	N/A	N/A	N/A	N/A	N/A	N/A	N/A	N/A	N/A	N/A	N/A	N/A	4.32153	4.32153	1	0.635638	0.635638	11.6483	8.00824	0.687503	1.06626	0.903537	7.09496	5.88284	0.829158	0.85095	0.769587	N/A	N/A		Bound
221496	LEMD2	LEM domain containing 2	protein-coding gene	gene with protein product	8.43086	7.6781	0.910714	0.925872	0.885254	N/A	N/A	N/A	N/A	N/A	N/A	N/A	N/A	N/A	N/A	4.68166	4.68166	1	0.6704	0.6704	11.2843	3.64011	0.322582	1.05247	0.561115	7.26837	4.12817	0.567963	0.861437	0.615757	N/A	N/A		Bound		X	X
221935	SDK1	sidekick cell adhesion molecule 1	protein-coding gene	gene with protein product	N/A	N/A	N/A	N/A	N/A	N/A	N/A	N/A	N/A	N/A	N/A	N/A	N/A	N/A	N/A	5.40192	5.40192	1	0.732548	0.732548	11.6483	11.4663	0.984375	1.06626	1.05942	7.93243	7.87021	0.992157	0.899406	0.895986	N/A	N/A		Bound	X	X	X
222553	SLC35F1	solute carrier family 35, member F1	protein-coding gene	gene with protein product	N/A	N/A	N/A	N/A	N/A	N/A	N/A	N/A	N/A	N/A	N/A	N/A	N/A	N/A	N/A	3.96141	3.96141	1	0.59785	0.59785	12.0124	11.9214	0.992424	1.07963	1.07633	6.89825	6.87207	0.996205	0.838739	0.837088	N/A	N/A		Bound		X	X
253782	CERS6	ceramide synthase 6	protein-coding gene	gene with protein product	9.63526	9.63526	1	0.983863	0.983863	3.90416	1.11547	0.285713	0.591528	0.0474579	6.13332	3.27839	0.534521	0.787696	0.515661	N/A	N/A	N/A	N/A	N/A	4.73214	4.73214	1	0.675058	0.675058	N/A	N/A	N/A	N/A	N/A	N/A	N/A	Bound			X	X
283464	GXYLT1	glucoside xylosyltransferase 1	protein-coding gene	gene with protein product	N/A	N/A	N/A	N/A	N/A	3.0422	3.0422	1	0.483188	0.483188	N/A	N/A	N/A	N/A	N/A	3.60128	3.60128	1	0.556457	0.556457	8.19024	6.6432	0.811112	0.913297	0.822377	5.43096	4.89122	0.900617	0.734877	0.689417	N/A	N/A		Bound		X		X
284801	MIR663AHG	MIR663A host gene	non-coding RNA	RNA, long non-coding	12.4455	7.20637	0.579034	1.09501	0.857717	7.60551	5.78019	0.76	0.881128	0.761942	9.72905	6.45401	0.663375	0.98807	0.809829	15.6056	10.0836	0.646153	1.19328	1.00361	7.28022	4.4288	0.608333	0.862145	0.646286	10.6589	6.68268	0.626958	1.02771	0.82495	1.09557	0.131686	Bound	Bound
285600	KIAA0825	KIAA0825	protein-coding gene	gene with protein product	119.186	8.02938	0.0673685	2.07623	0.904682	85.4606	3.52389	0.0412341	1.93177	0.547022	100.924	5.31927	0.0527056	2.004	0.725852	90.032	1.02036	0.0113333	1.9544	0.00875343	148.359	25.1446	0.169485	2.17131	1.40044	115.573	5.06523	0.0438272	2.06286	0.704599	1.14514	0.195527	Bound	Bound
374882	TMEM205	transmembrane protein 205	protein-coding gene	gene with protein product	22.5826	10.9902	0.486667	1.35377	1.04101	3.65065	3.65065	1	0.56237	0.56237	9.07972	6.33415	0.697615	0.958072	0.801688	8.64307	8.64307	1	0.936668	0.936668	32.9884	15.5159	0.470345	1.51836	1.19078	16.8855	11.5804	0.685817	1.22751	1.06372	1.8597	0.895069	Bound	Bound		X			X
375449	MAST4	microtubule associated serine/threonine kinase family member 4	protein-coding gene	gene with protein product	N/A	N/A	N/A	N/A	N/A	N/A	N/A	N/A	N/A	N/A	N/A	N/A	N/A	N/A	N/A	5.76204	5.58198	0.968751	0.760576	0.746788	4.36813	4.36813	1	0.640296	0.640296	5.01691	4.9379	0.984251	0.700436	0.693542	N/A	N/A		Bound
378706	RN7SL2	RNA, 7SL, cytoplasmic 2	non-coding RNA	RNA, small cytoplasmic	135.611	92.7961	0.684282	2.13229	1.96753	79.1683	57.0219	0.720262	1.89855	1.75604	103.615	72.7421	0.702041	2.01542	1.86179	118.614	82.5243	0.695738	2.07414	1.91658	277.956	189.879	0.683126	2.44398	2.27848	181.575	125.178	0.689403	2.25906	2.09753	1.7524	0.809331	Bound	Bound
378938	MALAT1	metastasis associated lung adenocarcinoma transcript 1 (non-protein coding)	non-coding RNA	RNA, long non-coding	3.61322	2.40882	0.666669	0.557894	0.381804	16.7321	8.36606	0.5	1.22355	0.922521	7.7754	4.48913	0.577351	0.890723	0.652163	16.5659	16.5659	1	1.21921	1.21921	54.6319	35.5972	0.651582	1.73745	1.55142	30.0836	24.2837	0.807206	1.47833	1.38532	3.86908	1.95199	Bound	Bound
386724	AMIGO3	adhesion molecule with Ig-like domain 3	protein-coding gene	gene with protein product	N/A	N/A	N/A	N/A	N/A	N/A	N/A	N/A	N/A	N/A	N/A	N/A	N/A	N/A	N/A	4.32153	4.32153	1	0.635638	0.635638	6.06685	4.18612	0.689999	0.782963	0.621812	5.12036	4.25329	0.830662	0.7093	0.628725	N/A	N/A		Bound	X	X	X
406960	MIR184	microRNA 184	non-coding RNA	RNA, micro	N/A	N/A	N/A	N/A	N/A	5.32386	1.06477	0.2	0.726227	0.0272558	N/A	N/A	N/A	N/A	N/A	13.6849	3.78134	0.276315	1.13624	0.577646	34.126	2.57841	0.0755556	1.53309	0.411352	21.6104	3.12247	0.144489	1.33466	0.494499	N/A	N/A		Bound
440026	TMEM41B	transmembrane protein 41B	protein-coding gene	gene with protein product	N/A	N/A	N/A	N/A	N/A	3.95487	3.95487	1	0.597132	0.597132	N/A	N/A	N/A	N/A	N/A	3.60128	3.60128	1	0.556457	0.556457	19.4746	19.3836	0.995327	1.28947	1.28743	8.37457	8.35498	0.997661	0.922962	0.921945	N/A	N/A		Bound		X	X
643749	TRAF3IP2-AS1	TRAF3IP2 antisense RNA 1	non-coding RNA	RNA, long non-coding	4.81763	1.75643	0.364584	0.682833	0.244631	3.95487	1.97743	0.499999	0.597132	0.296101	4.36499	1.86366	0.426956	0.639983	0.270366	5.76204	2.58092	0.447918	0.760576	0.411775	6.7342	3.33677	0.495496	0.828286	0.523326	6.22918	2.93461	0.471107	0.794431	0.46755	1.42708	0.513066		Bound
100500815	MIR3687-1	microRNA 3687-1	non-coding RNA	RNA, micro	23.8874	14.8042	0.619749	1.37817	1.17038	13.842	11.9914	0.866305	1.1412	1.07887	18.1838	13.3238	0.732729	1.25968	1.12463	8.28294	3.60128	0.434783	0.918185	0.556457	70.4118	59.3262	0.84256	1.84765	1.77325	24.1499	14.6168	0.605253	1.38291	1.16485	1.3281	0.409365	Bound	Bound
100500862	MIR3648-1	microRNA 3648-1	non-coding RNA	RNA, micro	20.2741	12.495	0.616304	1.30694	1.09674	11.6618	8.36606	0.71739	1.06677	0.922521	15.3764	10.2242	0.664929	1.18685	1.00963	28.6901	13.6248	0.474896	1.45773	1.13433	34.8237	22.2148	0.637921	1.54187	1.34664	31.6085	17.3975	0.550405	1.4998	1.24049	2.05565	1.0396	Bound	Bound
100505894	TMEM161B-AS1	TMEM161B antisense RNA 1	non-coding RNA	RNA, long non-coding	12.0943	6.0304	0.498615	1.08258	0.780346	N/A	N/A	N/A	N/A	N/A	N/A	N/A	N/A	N/A	N/A	3.24115	1.62058	0.500002	0.510699	0.20967	9.97997	7.46728	0.748227	0.999129	0.873162	5.68741	3.4787	0.611649	0.754914	0.541416	N/A	N/A		Bound
100507246	SNHG16	small nucleolar RNA host gene 16	non-coding RNA	RNA, long non-coding	N/A	N/A	N/A	N/A	N/A	3.0422	3.0422	1	0.483188	0.483188	N/A	N/A	N/A	N/A	N/A	4.32153	4.14147	0.958334	0.635638	0.617155	6.18818	6.18818	1	0.791563	0.791563	5.17131	5.06243	0.978945	0.7136	0.704359	N/A	N/A		Bound
