# Supplementary material for: The unfolded protein response and endoplasmic reticulum protein targeting machineries converge on the stress sensor IRE1
Source: eLife. 2018 Dec 24;7:e43036. doi: 10.7554/eLife.43036 (PMC6336407; doi:10.7554/eLife.43036)
Supplement: Supplementary file 2. [file elife-43036-supp2.xlsx]

## Sheet: Sheet1
tRNA Gene identifiers									Control - Replicate 1					Control - Replicate 2					GeoMean Averages - Control					ER stress - Replicate 1					ER stress - Replicate 2					GeoMean Averages - ER stress					Fold change ER stress		Call
name	chrom	chromStart	chromEnd	strand	aminoacid	anticodon	codon	intron	Copies	T2C	T2C/Copies	Log Copies	Log T2C	Copies	T2C	T2C/Copies	Log Copies	Log T2C	Copies	T2C	T2C/Copies	Log Copies	Log T2C	Copies	T2C	T2C/Copies	Log Copies	Log T2C	Copies	T2C	T2C/Copies	Log Copies	Log T2C	Copies	T2C	T2C/Copies	Log Copies	Log T2C	FC Copies	Log 2 FC Copies	Control	ER Stress
chr1.tRNA134-GluTTC	chr1	16861773	16861845	-	Glu	TTC	GAA	No canonical tRNA introns	187.09	89.1144	0.476318	2.27205	1.94995	323.194	104.19	0.322376	2.50946	2.01783	245.899	96.3578	0.391859	2.39076	1.98389	261.681	99.8194	0.381455	2.41777	1.99921	475.322	171.274	0.360333	2.67699	2.23369	352.679	130.753	0.370743	2.54738	2.11645	1.43424	0.520291	Bound	Bound
chr1.tRNA133-GlyCCC	chr1	16872433	16872504	-	Gly	CCC	GGG	No canonical tRNA introns	113.786	56.0426	0.492526	2.05609	1.74852	58.2379	11.8266	0.203074	1.76521	1.07286	81.4043	25.7448	0.316258	1.91065	1.41069	106.838	52.5306	0.491685	2.02873	1.72041	185.497	39.6984	0.214011	2.26834	1.59877	140.777	45.666	0.324385	2.14853	1.65959	1.72935	0.790234	Bound	Bound
chr1.tRNA2-GlyCCC	chr1	17053779	17053850	+	Gly	CCC	GGG	No canonical tRNA introns	1.92705	0	0	0.284893	N/A	2.35264	0.212954	0.090517	0.371555	-0.671714	2.12924	N/A	N/A	0.328224	N/A	6.65636	1.91268	0.287346	0.823237	0.281642	10.3743	5.15682	0.497076	1.01596	0.712382	8.30994	3.1406	0.377933	0.919598	0.497012	3.90278	1.9645		Bound
chr1.tRNA4-GlyCCC	chr1	17188415	17188486	+	Gly	CCC	GGG	No canonical tRNA introns	113.726	56.7201	0.498743	2.05586	1.75374	58.1619	11.8266	0.203339	1.76464	1.07286	81.3297	25.8999	0.318456	1.91025	1.4133	106.748	52.5306	0.492099	2.02836	1.72041	190.047	42.7318	0.224849	2.27886	1.63075	142.433	47.3786	0.332638	2.15361	1.67558	1.7513	0.808428	Bound	Bound
chr1.tRNA5-GluTTC	chr1	17199077	17199149	+	Glu	TTC	GAA	No canonical tRNA introns	190.929	91.857	0.481106	2.28087	1.96311	326.388	107.133	0.328238	2.51373	2.02992	249.634	99.2014	0.397388	2.3973	1.99652	265.642	107.238	0.403694	2.4243	2.03035	470.165	175.41	0.373082	2.67225	2.24405	353.406	137.152	0.388086	2.54827	2.1372	1.4157	0.501513	Bound	Bound
chr1.tRNA9-ArgTCT	chr1	94313128	94313213	+	Arg	TCT	AGA	Canonical tRNA intron at pos 38-49:GAGGCTGAAGGC(12 bp)	15.2056	4.51653	0.297031	1.182	0.654805	4.10698	0.836606	0.203703	0.613523	-0.077479	7.90247	1.94385	0.24598	0.897763	0.288663	43.0353	16.0257	0.372385	1.63382	1.20482	46.5934	13.1954	0.283203	1.66832	1.12042	44.779	14.5419	0.324747	1.65107	1.16262	5.66646	2.50245	Bound	Bound
chr1.tRNA119-LysCTT	chr1	145395521	145395594	-	Lys	CTT	AAG	No canonical tRNA introns	74.4675	10.4984	0.14098	1.87197	1.02112	45.1362	7.47368	0.165581	1.65452	0.873534	57.9757	8.85786	0.152786	1.76325	0.947329	52.3986	5.85808	0.111798	1.71932	0.767755	60.5107	24.0581	0.397584	1.78183	1.38126	56.3088	11.8716	0.21083	1.75058	1.07451	0.971248	-0.0420887	Bound	Bound
chr1.tRNA15-GlnCTG	chr1	145963303	145963375	+	Gln	CTG	CAG	No canonical tRNA introns	2.30343	2.18299	0.947713	0.362375	0.339052	2.35771	1.44505	0.612904	0.37249	0.159883	2.33041	1.7761	0.76214	0.367433	0.249467	7.38262	5.50695	0.745934	0.868211	0.740911	12.6403	10.0012	0.791215	1.10176	1.00005	9.66015	7.42133	0.768241	0.984984	0.870482	4.14525	2.05146		Bound
chr1.tRNA19-GlnCTG	chr1	147505037	147505109	+	Gln	CTG	CAG	No canonical tRNA introns	2.30343	2.18299	0.947713	0.362375	0.339052	2.35771	1.44505	0.612904	0.37249	0.159883	2.33041	1.7761	0.76214	0.367433	0.249467	7.38262	5.50695	0.745934	0.868211	0.740911	12.6403	10.0012	0.791215	1.10176	1.00005	9.66015	7.42133	0.768241	0.984984	0.870482	4.14525	2.05146		Bound
chr1.tRNA112-GlnCTG	chr1	147737381	147737453	-	Gln	CTG	CAG	No canonical tRNA introns	7.45227	3.6885	0.49495	0.872289	0.56685	2.23602	1.35378	0.605442	0.349476	0.131548	4.08209	2.2346	0.547415	0.610882	0.349199	5.79806	1.20643	0.208075	0.763283	0.0815021	14.3147	6.31559	0.441196	1.15578	0.800414	9.1103	2.76031	0.302988	0.959532	0.440958	2.23177	1.15819		Bound
chr1.tRNA26-AsnGTT	chr1	148248114	148248188	+	Asn	GTT	AAC	No canonical tRNA introns	65.7406	0.180661	0.00274809	1.81783	-0.743136	37.8146	0.578019	0.0152856	1.57766	-0.238058	49.8593	0.323149	0.00648122	1.69775	-0.490597	25.221	0.280099	0.0111058	1.40176	-0.552688	53.2608	0.473214	0.00888485	1.72641	-0.324942	36.6509	0.36407	0.00993344	1.56408	-0.438815	0.735086	-0.444014	Bound	Bound
chr1.tRNA108-AsnGTT	chr1	148598313	148598387	-	Asn	GTT	AAC	No canonical tRNA introns	9.73563	8.48104	0.871134	0.988364	0.928449	19.4701	5.32386	0.273438	1.28937	0.726227	13.7678	6.71951	0.488058	1.13887	0.827338	7.02249	5.40192	0.769231	0.846491	0.732548	74.8679	53.2821	0.711682	1.8743	1.72658	22.9294	16.9654	0.739897	1.36039	1.22956	1.66543	0.735898	Bound	Bound
chr1.tRNA107-AsnGTT	chr1	148760355	148760429	-	Asn	GTT	AAC	No canonical tRNA introns	9.73563	8.48104	0.871134	0.988364	0.928449	19.4701	5.32386	0.273438	1.28937	0.726227	13.7678	6.71951	0.488058	1.13887	0.827338	7.02249	5.40192	0.769231	0.846491	0.732548	74.9589	53.2821	0.710818	1.87482	1.72658	22.9434	16.9654	0.739448	1.36066	1.22956	1.66645	0.736774	Bound	Bound
chr1.tRNA28-GlnCTG	chr1	149186124	149186196	+	Gln	CTG	CAG	No canonical tRNA introns	7.45227	3.6885	0.49495	0.872289	0.56685	2.23602	1.35378	0.605442	0.349476	0.131548	4.08209	2.2346	0.547415	0.610882	0.349199	5.79806	1.20643	0.208075	0.763283	0.0815021	14.3147	6.31559	0.441196	1.15578	0.800414	9.1103	2.76031	0.302988	0.959532	0.440958	2.23177	1.15819		Bound
chr1.tRNA102-PseudoTTC	chr1	149278784	149278857	-	Pseudo	TTC	GAA	No canonical tRNA introns	0.421543	0	0	-0.375158	N/A	22.4515	11.7936	0.525292	1.35125	1.07165	3.07641	N/A	N/A	0.488044	N/A	56.324	24.8128	0.440537	1.75069	1.39468	28.5566	9.75549	0.341619	1.45571	0.989249	40.1051	15.5583	0.387938	1.6032	1.19196	13.0364	3.70447		Bound
chr1.tRNA94-GluTTC	chr1	149664354	149664427	-	Glu	TTC	GAA	No canonical tRNA introns	110.384	57.2269	0.518435	2.04291	1.7576	135.059	18.8972	0.139918	2.13052	1.2764	122.1	32.8851	0.26933	2.08671	1.517	121.867	49.5776	0.406817	2.08589	1.69529	112.534	37.3096	0.331541	2.05128	1.57182	117.108	43.0084	0.367255	2.06858	1.63355	0.959114	-0.0602262	Bound	Bound
chr1.tRNA91-PseudoCCC	chr1	149680209	149680280	-	Pseudo	CCC	GGG	No canonical tRNA introns	10.664	2.47154	0.231765	1.02792	0.392968	4.49232	2.27151	0.505643	0.652471	0.356315	6.92142	2.36942	0.342331	0.840195	0.374641	15.3595	3.46323	0.225478	1.18638	0.539481	20.2087	3.17599	0.15716	1.30554	0.501879	17.618	3.3165	0.188245	1.24596	0.52068	2.54544	1.34791	Bound	Bound
chr1.tRNA32-MetCAT	chr1	153643725	153643797	+	Met	CAT	AUG	No canonical tRNA introns	0.903306	0.607222	0.672222	-0.0441651	-0.216653	0.730129	0.486753	0.666667	-0.1366	-0.312691	0.812114	0.543661	0.669439	-0.0903828	-0.264672	7.20256	4.32153	0.599999	0.857487	0.635638	9.13667	8.75446	0.958167	0.960788	0.942229	8.11218	6.15083	0.758221	0.909137	0.788933	9.98896	3.32033		Bound
chr1.tRNA86-ArgTCT	chr1	159111400	159111474	-	Arg	TCT	AGA	No canonical tRNA introns	18.4425	7.22645	0.391837	1.26582	0.858925	18.2127	3.49854	0.192093	1.26037	0.543887	18.3272	5.02812	0.274352	1.2631	0.701406	0.360128	0	0	-0.443543	N/A	33.9258	3.2943	0.0971031	1.53053	0.517763	3.49537	N/A	N/A	0.543493	N/A	0.19072	-2.39047	Bound
chr1.tRNA84-GluTTC	chr1	161391882	161391954	-	Glu	TTC	GAA	No canonical tRNA introns	187.722	89.7844	0.478284	2.27352	1.9532	322.661	104.013	0.32236	2.50875	2.01709	246.111	96.6372	0.392657	2.39113	1.98514	262.329	99.0812	0.377698	2.41885	1.99599	473.988	171.335	0.361475	2.67577	2.23385	352.62	130.292	0.369498	2.54731	2.11492	1.43277	0.518805	Bound	Bound
chr1.tRNA82-GlyTCC	chr1	161409960	161410032	-	Gly	TCC	GGA	No canonical tRNA introns	6.47369	1.95716	0.302325	0.811152	0.291626	16.7321	16.4279	0.981819	1.22355	1.21558	10.4076	5.67028	0.54482	1.01735	0.753604	16.5659	9.36332	0.565216	1.21922	0.97143	93.8389	34.126	0.363666	1.97238	1.53309	39.4275	17.8755	0.453376	1.5958	1.25226	3.78833	1.92156	Bound	Bound
chr1.tRNA35-GlyGCC	chr1	161413093	161413164	+	Gly	GCC	GGC	No canonical tRNA introns	18.6081	9.03306	0.485437	1.2697	0.955835	14.9676	5.3847	0.359757	1.17515	0.731162	16.6889	6.97426	0.417899	1.22243	0.843498	23.4083	10.5517	0.450767	1.36937	1.02332	44.4821	24.1642	0.543234	1.64819	1.38317	32.2684	15.9679	0.494846	1.50878	1.20325	1.93353	0.951236	Bound	Bound
chr1.tRNA37-GlyGCC	chr1	161420466	161420537	+	Gly	GCC	GGC	No canonical tRNA introns	18.6081	9.03306	0.485437	1.2697	0.955835	14.9676	5.3847	0.359757	1.17515	0.731162	16.6889	6.97426	0.417899	1.22243	0.843498	23.4083	10.5517	0.450767	1.36937	1.02332	44.4821	24.1642	0.543234	1.64819	1.38317	32.2684	15.9679	0.494846	1.50878	1.20325	1.93353	0.951236	Bound	Bound
chr1.tRNA39-GlyGCC	chr1	161427897	161427968	+	Gly	GCC	GGC	No canonical tRNA introns	18.6081	9.03306	0.485437	1.2697	0.955835	14.9676	5.3847	0.359757	1.17515	0.731162	16.6889	6.97426	0.417899	1.22243	0.843498	23.4083	10.5517	0.450767	1.36937	1.02332	44.4821	24.1642	0.543234	1.64819	1.38317	32.2684	15.9679	0.494846	1.50878	1.20325	1.93353	0.951236	Bound	Bound
chr1.tRNA41-GlyGCC	chr1	161435257	161435328	+	Gly	GCC	GGC	No canonical tRNA introns	18.6081	9.03306	0.485437	1.2697	0.955835	14.9676	5.3847	0.359757	1.17515	0.731162	16.6889	6.97426	0.417899	1.22243	0.843498	23.4083	10.5517	0.450767	1.36937	1.02332	44.4821	24.1642	0.543234	1.64819	1.38317	32.2684	15.9679	0.494846	1.50878	1.20325	1.93353	0.951236	Bound	Bound
chr1.tRNA52-ProCGG	chr1	167683961	167684033	+	Pro	CGG	CCG	No canonical tRNA introns	12.1043	3.76377	0.310945	1.08294	0.575623	5.95765	0.30422	0.0510638	0.775075	-0.516812	8.49195	1.07005	0.126008	0.929007	0.0294054	3.88938	1.80064	0.462963	0.58988	0.255427	0.0455013	0	0	-1.34198	N/A	0.42068	N/A	N/A	-0.376048	N/A	0.0495387	-4.3353	Bound
chr1.tRNA54-LysTTT	chr1	204475654	204475727	+	Lys	TTT	AAA	No canonical tRNA introns	33.3621	2.25826	0.0676894	1.52325	0.353774	17.2189	3.45797	0.200824	1.23601	0.538821	23.9679	2.79446	0.116592	1.37963	0.446298	37.0932	2.36484	0.063754	1.56929	0.373802	36.4739	4.82314	0.132235	1.56198	0.68333	36.7822	3.37727	0.0918179	1.56564	0.528566	1.53465	0.617908	Bound	Bound
chr1.tRNA62-LysTTT	chr1	204476157	204476230	-	Lys	TTT	AAA	No canonical tRNA introns	41.6926	6.77479	0.162494	1.62006	0.830896	20.3118	3.53403	0.173989	1.30775	0.54827	29.1007	4.89309	0.168143	1.4639	0.689583	52.1285	11.6381	0.223258	1.71708	1.06588	41.479	4.86864	0.117376	1.61783	0.687408	46.4999	7.5274	0.16188	1.66745	0.876645	1.59789	0.676172	Bound	Bound
chr1.tRNA56-ThrTGT	chr1	222638346	222638419	+	Thr	TGT	ACA	No canonical tRNA introns	26.9185	24.4495	0.908279	1.43005	1.38827	15.3631	13.6899	0.89109	1.18648	1.1364	20.336	18.2951	0.899643	1.30826	1.26234	14.9453	11.164	0.746991	1.1745	1.04782	107.899	0	0	2.03302	N/A	40.157	N/A	N/A	1.60376	N/A	1.97468	0.981617	Bound
chr2.tRNA1-PseudoCCC	chr2	11691826	11691898	+	Pseudo	CCC	GGG	No canonical tRNA introns	19.948	2.18299	0.109434	1.2999	0.339052	35.7713	8.61958	0.240964	1.55353	0.935486	26.7127	4.33779	0.162387	1.42672	0.637269	18.0664	1.4105	0.0780731	1.25687	0.149373	53.364	9.71201	0.181996	1.72725	0.987309	31.0499	3.70119	0.119201	1.49206	0.568341	1.16237	0.217065	Bound	Bound
chr2.tRNA27-GlyCCC	chr2	70476122	70476193	-	Gly	CCC	GGG	No canonical tRNA introns	157.12	60.9581	0.387972	2.19623	1.78503	177.619	47.8463	0.269376	2.24949	1.67985	167.055	54.0057	0.32328	2.22286	1.73244	151.818	39.506	0.260219	2.18132	1.59666	304.358	142.965	0.469726	2.48338	2.15523	214.958	75.153	0.349617	2.33235	1.87595	1.28675	0.36373	Bound	Bound
chr2.tRNA20-GluTTC	chr2	131094700	131094772	-	Glu	TTC	GAA	No canonical tRNA introns	363.726	95.1532	0.261607	2.56077	1.97842	141.503	57.2796	0.404794	2.15077	1.758	226.866	73.8264	0.325418	2.35577	1.86821	206.407	60.3964	0.292608	2.31472	1.78101	396.735	134.655	0.339408	2.5985	2.12922	286.162	90.1814	0.315141	2.45661	1.95512	1.26137	0.334991	Bound	Bound
chr3.tRNA11-ArgACG	chr3	45730490	45730563	-	Arg	ACG	CGU	No canonical tRNA introns	22.9139	0.687516	0.0300043	1.3601	-0.162717	40.8162	0.646468	0.0158385	1.61083	-0.189453	30.582	0.666676	0.0217996	1.48547	-0.176085	21.0495	0	0	1.32324	N/A	22.8417	0.819024	0.0358565	1.35873	-0.0867034	21.9273	N/A	N/A	1.34099	N/A	0.717	-0.479954	Bound
chr3.tRNA7-CysGCA	chr3	131947943	131948015	-	Cys	GCA	UGC	No canonical tRNA introns	7.72828	3.76377	0.487013	0.888083	0.575623	6.99707	1.21688	0.173913	0.844916	0.0852478	7.35359	2.14011	0.291029	0.8665	0.330435	12.9646	1.62058	0.125	1.11276	0.20967	26.3908	0	0	1.42145	N/A	18.4972	N/A	N/A	1.26711	N/A	2.5154	1.33079	Bound
chr3.tRNA2-ValAAC	chr3	169490017	169490090	+	Val	AAC	GUU	No canonical tRNA introns	9.05815	0.361322	0.0398892	0.95704	-0.442106	28.3483	0.486753	0.0171704	1.45253	-0.312691	16.0245	0.419374	0.0261709	1.20478	-0.377398	7.85679	0.280099	0.0356506	0.895245	-0.552688	75.4534	1.56525	0.0207446	1.87768	0.194584	24.3479	0.662137	0.0271948	1.38646	-0.179052	1.51942	0.603524	Bound	Bound
chr5.tRNA24-LysCTT	chr5	26198538	26198611	-	Lys	CTT	AAG	No canonical tRNA introns	11.3415	0.200735	0.0176992	1.05467	-0.697377	7.61565	0.15211	0.0199733	0.881707	-0.817842	9.2937	0.174739	0.0188019	0.968189	-0.75761	17.2261	3.99142	0.231708	1.23619	0.601127	8.85153	1.12237	0.1268	0.947018	0.050136	12.3482	2.11657	0.171407	1.0916	0.325632	1.32866	0.409972	Bound	Bound
chr5.tRNA22-AspGTC	chr5	141773987	141774059	-	Asp	GTC	GAC	No canonical tRNA introns	26.6475	1.40514	0.0527307	1.42566	0.14772	37.7233	12.0167	0.318548	1.57661	1.07979	31.7054	4.10915	0.129604	1.50113	0.613752	12.1243	4.68166	0.386139	1.08366	0.6704	82.0844	41.1332	0.501109	1.91426	1.61419	31.547	13.877	0.439883	1.49896	1.1423	0.995006	-0.00722328	Bound	Bound
chr5.tRNA19-LeuAAG	chr5	180524473	180524555	-	Leu	AAG	CUU	No canonical tRNA introns	21.2126	10.1246	0.477292	1.32659	1.00538	28.0035	14.7378	0.526284	1.44721	1.16843	24.3727	12.2153	0.50119	1.3869	1.08691	13.2347	7.82378	0.591157	1.12171	0.893417	92.4314	67.747	0.732944	1.96582	1.83089	34.9757	23.0225	0.658243	1.54377	1.36215	1.43504	0.52109	Bound	Bound
chr5.tRNA3-LeuAAG	chr5	180528839	180528921	+	Leu	AAG	CUU	No canonical tRNA introns	21.2126	10.1246	0.477292	1.32659	1.00538	28.0035	14.7378	0.526284	1.44721	1.16843	24.3727	12.2153	0.50119	1.3869	1.08691	13.2347	7.5987	0.57415	1.12171	0.880739	92.4314	67.7697	0.733189	1.96582	1.83104	34.9757	22.6928	0.648815	1.54377	1.35589	1.43504	0.52109	Bound	Bound
chr5.tRNA16-LeuAAG	chr5	180601043	180601125	-	Leu	AAG	CUU	No canonical tRNA introns	21.2126	10.1246	0.477292	1.32659	1.00538	28.0035	14.7378	0.526284	1.44721	1.16843	24.3727	12.2153	0.50119	1.3869	1.08691	13.2347	7.82378	0.591157	1.12171	0.893417	92.4314	67.747	0.732944	1.96582	1.83089	34.9757	23.0225	0.658243	1.54377	1.36215	1.43504	0.52109	Bound	Bound
chr5.tRNA7-LeuAAG	chr5	180614700	180614782	+	Leu	AAG	CUU	No canonical tRNA introns	45.8127	42.0338	0.917514	1.66099	1.6236	71.507	64.7381	0.905339	1.85435	1.81116	57.2357	52.165	0.911406	1.75767	1.71738	59.3311	52.3266	0.881942	1.77328	1.71872	68.3612	53.7644	0.786475	1.83481	1.73049	63.6863	53.0406	0.832842	1.80405	1.72461	1.1127	0.154067	Bound	Bound
chr5.tRNA15-ValAAC	chr5	180615415	180615488	-	Val	AAC	GUU	No canonical tRNA introns	414.818	138.565	0.334038	2.61786	2.14165	240.537	55.9428	0.232575	2.38118	1.74774	315.878	88.0438	0.278727	2.49952	1.9447	377.174	105.427	0.279518	2.57654	2.02295	687.935	190.58	0.277032	2.83755	2.28008	509.383	141.747	0.278272	2.70704	2.15151	1.61259	0.689383	Bound	Bound
chr5.tRNA13-ThrTGT	chr5	180618686	180618758	-	Thr	TGT	ACA	No canonical tRNA introns	166.223	155.376	0.934744	2.22069	2.19138	19.4701	14.9829	0.769534	1.28937	1.1756	56.8892	48.2492	0.848126	1.75503	1.68349	167.405	158.654	0.947726	2.22377	2.20045	8.9941	0	0	0.953958	N/A	38.8028	N/A	N/A	1.58886	N/A	0.682077	-0.551993	Bound
chr5.tRNA8-AlaTGC	chr5	180633867	180633939	+	Ala	TGC	GCA	No canonical tRNA introns	4.01469	1.80661	0.45	0.603652	0.256864	3.20446	1.33857	0.417721	0.505755	0.126641	3.58677	1.55508	0.43356	0.554703	0.191753	5.11381	3.96141	0.774649	0.708745	0.59785	15.7556	3.02786	0.192177	1.19743	0.481136	8.97614	3.46332	0.385836	0.95309	0.539493	2.50257	1.32341		Bound
chr5.tRNA9-LysCTT	chr5	180634754	180634827	+	Lys	CTT	AAG	No canonical tRNA introns	194.231	9.26892	0.0477211	2.28832	0.967029	112.846	6.49511	0.0575573	2.05249	0.812587	148.048	7.75904	0.052409	2.1704	0.889808	180.25	5.25787	0.0291699	2.25588	0.72081	116.429	24.0429	0.206503	2.06606	1.38099	144.867	11.2434	0.0776122	2.16097	1.0509	0.978511	-0.0313395	Bound	Bound
chr5.tRNA11-LysCTT	chr5	180648978	180649051	-	Lys	CTT	AAG	No canonical tRNA introns	37.6678	9.04309	0.240075	1.57597	0.956317	30.3004	6.41905	0.211847	1.48145	0.807471	33.7839	7.61893	0.22552	1.52871	0.881894	25.479	5.25787	0.206361	1.40618	0.72081	48.6864	23.9822	0.492585	1.68741	1.37989	35.2205	11.2292	0.318826	1.5468	1.05035	1.04252	0.0600794	Bound	Bound
chr6.tRNA1-GlnCTG	chr6	18836401	18836473	+	Gln	CTG	CAG	No canonical tRNA introns	9.33416	6.38336	0.683871	0.970075	0.805049	3.71149	2.49461	0.672132	0.569548	0.397003	5.88588	3.99049	0.677976	0.769812	0.601026	10.2276	7.5987	0.74296	1.00977	0.880739	27.0733	19.1045	0.705658	1.43254	1.28114	16.6402	12.0486	0.724069	1.22116	1.08094	2.82713	1.49934	Bound	Bound
chr6.tRNA174-GlnTTG	chr6	26311423	26311495	-	Gln	TTG	CAA	No canonical tRNA introns	221.365	176.421	0.796969	2.34511	2.24655	80.3041	36.0527	0.448952	1.90474	1.55694	133.329	79.7525	0.598165	2.12492	1.90174	365.752	312.006	0.853053	2.56319	2.49416	326.912	184.889	0.565562	2.51443	2.26691	345.787	240.18	0.69459	2.53881	2.38054	2.5935	1.3749	Bound	Bound
chr6.tRNA173-GlnTTG	chr6	26311974	26312046	-	Gln	TTG	CAA	No canonical tRNA introns	226.424	179.412	0.792372	2.35492	2.25385	86.1147	38.7653	0.450159	1.93508	1.58844	139.637	83.3964	0.597238	2.145	1.92115	362.187	305.235	0.842755	2.55893	2.48463	382.302	199.479	0.521784	2.58241	2.2999	372.109	246.755	0.663126	2.57067	2.39227	2.66483	1.41404	Bound	Bound
chr6.tRNA6-ArgACG	chr6	26328367	26328440	+	Arg	ACG	CGU	No canonical tRNA introns	7.00062	2.70992	0.387097	0.845137	0.432956	3.7267	2.61123	0.700682	0.571324	0.416845	5.10776	2.66012	0.520799	0.70823	0.424901	0.720256	0	0	-0.142513	N/A	7.09821	3.2761	0.461539	0.851149	0.515357	2.26109	N/A	N/A	0.354318	N/A	0.442677	-1.17567	Bound
chr6.tRNA168-TrpCCA	chr6	26331671	26331743	-	Trp	CCA	UGG	No canonical tRNA introns	52.0003	0.707589	0.0136074	1.71601	-0.150219	53.9535	5.22245	0.0967954	1.73202	0.717874	52.9679	1.92233	0.0362923	1.72401	0.283828	53.9652	0.660234	0.0122344	1.73211	-0.180302	112.476	3.5491	0.0315543	2.05106	0.550118	77.9089	1.53076	0.0196481	1.89159	0.184908	1.47087	0.556669	Bound	Bound
chr6.tRNA8-ArgACG	chr6	26537725	26537798	+	Arg	ACG	CGU	No canonical tRNA introns	6.90025	2.70992	0.392728	0.838865	0.432956	3.7267	2.61123	0.700682	0.571324	0.416845	5.07101	2.66012	0.524573	0.705095	0.424901	0.720256	0	0	-0.142513	N/A	7.09821	3.2761	0.461539	0.851149	0.515357	2.26109	N/A	N/A	0.354318	N/A	0.445885	-1.16526	Bound
chr6.tRNA10-AlaCGC	chr6	26553730	26553802	+	Ala	CGC	GCG	No canonical tRNA introns	61.9517	55.4529	0.895099	1.79205	1.74392	26.3556	13.9688	0.530013	1.42087	1.14516	40.4076	27.8318	0.688777	1.60646	1.44454	64.835	52.6537	0.812118	1.81181	1.72143	42.7379	20.148	0.471432	1.63081	1.30423	52.6395	32.5709	0.618755	1.72131	1.51283	1.30271	0.381518	Bound	Bound
chr6.tRNA13-LysCTT	chr6	26556773	26556846	+	Lys	CTT	AAG	No canonical tRNA introns	68.3451	10.0969	0.147734	1.83471	1.00419	43.8179	6.45961	0.147419	1.64165	0.810206	54.7242	8.07602	0.147577	1.73818	0.907197	52.2786	5.73804	0.109759	1.71832	0.758764	60.4501	23.9974	0.396979	1.7814	1.38016	56.2161	11.7345	0.208739	1.74986	1.06946	1.02726	0.0388035	Bound	Bound
chr6.tRNA165-IleAAT	chr6	26721220	26721294	-	Ile	AAT	AUU	No canonical tRNA introns	5.25423	0.526928	0.100286	0.720509	-0.278249	10.3688	0.359994	0.034719	1.01573	-0.443705	7.38106	0.435535	0.0590071	0.868119	-0.360977	5.13182	0.405144	0.0789474	0.710271	-0.392391	8.07194	0	0	0.906978	N/A	6.43613	N/A	N/A	0.808625	N/A	0.871979	-0.197635	Bound
chr6.tRNA28-IleAAT	chr6	26780831	26780905	+	Ile	AAT	AUU	No canonical tRNA introns	5.25423	0.526928	0.100286	0.720509	-0.278249	10.3688	0.359994	0.034719	1.01573	-0.443705	7.38106	0.435535	0.0590071	0.868119	-0.360977	5.13182	0.405144	0.0789474	0.710271	-0.392391	8.07194	0	0	0.906978	N/A	6.43613	N/A	N/A	0.808625	N/A	0.871979	-0.197635	Bound
chr6.tRNA30-ProCGG	chr6	27059520	27059592	+	Pro	CGG	CCG	No canonical tRNA introns	19.6318	4.66708	0.237731	1.29296	0.669045	12.0928	1.39434	0.115303	1.08253	0.144369	15.4079	2.55098	0.165563	1.18774	0.406707	6.41027	1.80064	0.280899	0.806876	0.255427	17.5453	2.90299	0.165457	1.24416	0.462846	10.6052	2.28632	0.215585	1.02552	0.359136	0.688296	-0.5389	Bound	Bound
chr6.tRNA33-HisGTG	chr6	27125905	27125977	+	His	GTG	CAC	No canonical tRNA introns	15.4566	1.65606	0.107143	1.18911	0.219076	8.89845	4.79147	0.538461	0.949314	0.680469	11.7277	2.81691	0.240192	1.06921	0.449772	2.52089	0	0	0.401554	N/A	32.397	12.6494	0.39045	1.5105	1.10207	9.03711	N/A	N/A	0.956029	N/A	0.770575	-0.375992	Bound
chr6.tRNA154-IleAAT	chr6	27205349	27205423	-	Ile	AAT	AUU	No canonical tRNA introns	33.4976	1.24205	0.0370788	1.52501	0.0941391	24.3072	0.359994	0.0148102	1.38573	-0.443705	28.5348	0.668678	0.0234338	1.45537	-0.174783	20.0771	0.405144	0.0201794	1.3027	-0.392391	22.0044	0	0	1.34251	N/A	21.0187	N/A	N/A	1.32261	N/A	0.736599	-0.441049	Bound
chr6.tRNA38-IleAAT	chr6	27241738	27241812	+	Ile	AAT	AUU	No canonical tRNA introns	16.109	10.7644	0.668223	1.20707	1.03199	10.9519	0	0	1.03949	N/A	13.2825	N/A	N/A	1.12328	N/A	10.8038	3.06109	0.283335	1.03358	0.485876	15.5615	2.91209	0.187134	1.19205	0.464205	12.9662	2.98566	0.230264	1.11281	0.47504	0.976191	-0.0347641		Bound
chr6.tRNA152-ValCAC	chr6	27248048	27248121	-	Val	CAC	GUG	No canonical tRNA introns	6.02204	0	0	0.779744	N/A	2.50982	0	0	0.399643	N/A	3.8877	N/A	N/A	0.589693	N/A	85.8905	33.2518	0.387142	1.93395	1.52182	151.246	53.0849	0.350984	2.17968	1.72497	113.976	42.0139	0.36862	2.05681	1.62339	29.3171	4.87367		Bound
chr6.tRNA40-ValTAC	chr6	27258404	27258477	+	Val	TAC	GUA	No canonical tRNA introns	69.5545	14.4529	0.207792	1.84233	1.15995	82.6719	40.005	0.483901	1.91736	1.60211	75.8301	24.0455	0.317098	1.87984	1.38103	64.4629	31.1511	0.483241	1.80931	1.49347	265.986	113.652	0.427286	2.42486	2.05558	130.944	59.5011	0.454403	2.11708	1.77453	1.7268	0.788103	Bound	Bound
chr6.tRNA42-GlnCTG	chr6	27263211	27263283	+	Gln	CTG	CAG	No canonical tRNA introns	4.51653	4.21543	0.933334	0.654805	0.624842	2.12954	2.12954	1	0.328286	0.328286	3.10131	2.99615	0.966092	0.491545	0.476564	4.32153	4.32153	1	0.635638	0.635638	39.4102	34.1427	0.866342	1.59561	1.5333	13.0504	12.147	0.930775	1.11562	1.08447	4.20802	2.07314		Bound
chr6.tRNA148-SerTGA	chr6	27473606	27473688	-	Ser	TGA	UCA	No canonical tRNA introns	6.12241	2.70992	0.442623	0.786922	0.432956	26.0058	10.1914	0.39189	1.41507	1.00823	12.6182	5.25527	0.416485	1.101	0.720595	21.3376	6.81242	0.319268	1.32915	0.833301	83.5223	33.2408	0.397987	1.9218	1.52167	42.2157	15.0483	0.356461	1.62547	1.17749	3.34563	1.74228	Bound	Bound
chr6.tRNA49-GlnCTG	chr6	27487307	27487379	+	Gln	CTG	CAG	No canonical tRNA introns	9.48471	6.38336	0.673016	0.977024	0.805049	2.19039	0.973505	0.444444	0.340521	-0.0116618	4.55798	2.49284	0.546916	0.658773	0.396694	10.2276	7.16654	0.700706	1.00977	0.85531	18.3067	12.7495	0.696439	1.26261	1.10549	13.6833	9.55876	0.698569	1.13619	0.980401	3.00206	1.58595		Bound
chr6.tRNA147-SerAGA	chr6	27509553	27509635	-	Ser	AGA	UCU	No canonical tRNA introns	2.81028	2.70992	0.964288	0.44875	0.432956	28.4395	7.25059	0.254948	1.45392	0.860373	8.93996	4.43266	0.495826	0.951336	0.646665	5.49195	3.57127	0.650274	0.739727	0.552823	82.4302	33.1295	0.40191	1.91609	1.52021	21.2768	10.8772	0.511225	1.32791	1.03652	2.37997	1.25094	Bound	Bound
chr6.tRNA51-SerTGA	chr6	27513467	27513549	+	Ser	TGA	UCA	No canonical tRNA introns	2.81028	2.70992	0.964288	0.44875	0.432956	28.4395	10.1914	0.358354	1.45392	1.00823	8.93996	5.25527	0.58784	0.951336	0.720595	5.49195	3.57127	0.650274	0.739727	0.552823	82.4302	35.6978	0.433067	1.91609	1.55264	21.2768	11.291	0.530671	1.32791	1.05273	2.37997	1.25094	Bound	Bound
chr6.tRNA146-GlnCTG	chr6	27515530	27515602	-	Gln	CTG	CAG	No canonical tRNA introns	229.691	172.464	0.750852	2.36114	2.2367	108.277	64.6722	0.597285	2.03454	1.81072	157.703	105.611	0.669681	2.19784	2.02371	378.914	320.589	0.846073	2.57854	2.50595	386.464	228.236	0.590575	2.58711	2.35838	382.67	270.499	0.706873	2.58282	2.43217	2.42652	1.27889	Bound	Bound
chr6.tRNA143-LysTTT	chr6	27559592	27559665	-	Lys	TTT	AAA	No canonical tRNA introns	9.33416	7.00062	0.75	0.970075	0.845137	5.42019	3.44783	0.636109	0.734015	0.537546	7.11287	4.91294	0.690711	0.852045	0.691341	9.78347	0	0	0.990493	N/A	27.7012	4.17096	0.15057	1.4425	0.620236	16.4625	N/A	N/A	1.2165	N/A	2.31447	1.21068	Bound
chr6.tRNA141-LeuCAA	chr6	27570347	27570454	-	Leu	CAA	UUG	Canonical tRNA intron at pos 39-61:TTGCTACTTCCCAGGTTTGGGGC(23 bp)	4.63697	0.301102	0.0649351	0.666234	-0.521286	4.92837	4.2743	0.867285	0.692703	0.630865	4.78045	1.13446	0.237312	0.679469	0.0547893	3.45723	1.00836	0.291667	0.538728	0.00361561	125.132	63.5199	0.507623	2.09737	1.80291	20.7993	8.00318	0.384782	1.31805	0.903263	4.3509	2.12132		Bound
chr6.tRNA140-LeuCAA	chr6	27573416	27573524	-	Leu	CAA	UUG	Canonical tRNA intron at pos 39-62:CTTACTGCTTCCTGTGTTCGGGTC(24 bp)	2.58948	0.331212	0.127907	0.413213	-0.479894	5.47597	2.12954	0.388888	0.738461	0.328286	3.76562	0.839839	0.223028	0.575837	-0.0758041	13.6849	4.10546	0.299999	1.13624	0.613362	6.26099	1.20124	0.191861	0.796643	0.0796298	9.2564	2.22073	0.239913	0.966442	0.346496	2.45813	1.29756		Bound
chr6.tRNA55-IleTAT	chr6	27599199	27599293	+	Ile	TAT	AUA	Canonical tRNA intron at pos 39-58:CAACAGTATATGTGCGGGTG(20 bp)	10.6891	9.18361	0.859157	1.02894	0.963013	0.507034	0	0	-0.294963	N/A	2.32803	N/A	N/A	0.366989	N/A	10.6838	6.4823	0.606741	1.02873	0.811729	33.5102	27.8013	0.829637	1.52518	1.44407	18.9213	13.4245	0.709489	1.27695	1.1279	8.1276	3.02283		Bound
chr6.tRNA138-ArgACG	chr6	27638343	27638416	-	Arg	ACG	CGU	No canonical tRNA introns	9.83098	3.73617	0.38004	0.992597	0.572427	8.26466	1.25491	0.15184	0.917225	0.0986126	9.01386	2.16531	0.24022	0.954911	0.33552	8.89516	1.17042	0.131579	0.949154	0.0683417	6.8252	0.819024	0.12	0.834115	-0.0867034	7.79174	0.979082	0.125656	0.891635	-0.00918082	0.864418	-0.210199	Bound	Bound
chr6.tRNA131-GlnCTG	chr6	27759134	27759206	-	Gln	CTG	CAG	No canonical tRNA introns	478.777	279.239	0.583234	2.68013	2.44598	734.292	537.299	0.731724	2.86587	2.73022	592.927	387.343	0.653273	2.773	2.5881	1039.33	781.483	0.75191	3.01675	2.89292	2814.41	1875.93	0.666545	3.44939	3.27322	1710.29	1210.79	0.707942	3.23307	3.08307	2.88449	1.52832	Bound	Bound
chr6.tRNA130-GlnTTG	chr6	27763639	27763711	-	Gln	TTG	CAA	No canonical tRNA introns	227.628	182.203	0.800442	2.35723	2.26056	83.2246	41.4678	0.498264	1.92025	1.61771	137.638	86.9227	0.631531	2.13874	1.93913	361.646	307.588	0.850522	2.55828	2.48797	364.49	208.616	0.57235	2.56169	2.31935	363.065	253.314	0.697708	2.55998	2.40366	2.63782	1.39935	Bound	Bound
chr6.tRNA62-SerGCT	chr6	28180814	28180896	+	Ser	GCT	AGC	No canonical tRNA introns	8.43085	7.52755	0.892858	0.925871	0.876654	19.1659	15.5152	0.809521	1.28253	1.19076	12.7116	10.807	0.850169	1.1042	1.03371	1.08038	0	0	0.0335765	N/A	28.3928	20.8396	0.733975	1.45321	1.31889	5.5385	N/A	N/A	0.743392	N/A	0.435705	-1.19858	Bound
chr6.tRNA64-GlnTTG	chr6	28557155	28557227	+	Gln	TTG	CAA	No canonical tRNA introns	76.5552	63.7357	0.832546	1.88397	1.80438	47.9046	16.6003	0.346528	1.68038	1.22012	60.5586	32.5274	0.537123	1.78218	1.51225	58.3707	41.2586	0.706838	1.76619	1.61551	126.9	55.5116	0.437444	2.10346	1.74438	86.0653	47.8574	0.556059	1.93483	1.67995	1.42119	0.5071	Bound	Bound
chr6.tRNA65-AlaAGC	chr6	28574932	28575004	+	Ala	AGC	GCU	No canonical tRNA introns	5.72094	5.72094	1	0.757467	0.757467	0.365065	0.365065	1	-0.43763	-0.43763	1.44517	1.44517	1	0.159919	0.159919	25.2089	10.0836	0.400002	1.40155	1.00362	6.03651	1.75939	0.291458	0.780786	0.245362	12.3359	4.212	0.341444	1.09117	0.624489	8.53594	3.09355		Bound
chr6.tRNA66-AlaTGC	chr6	28611221	28611293	+	Ala	TGC	GCA	No canonical tRNA introns	51.5637	46.5704	0.903162	1.71234	1.66811	23.4148	16.9645	0.72452	1.36949	1.22954	34.747	28.1077	0.808925	1.54092	1.44883	57.6325	50.3729	0.874036	1.76067	1.7022	24.1976	13.2288	0.546699	1.38377	1.12152	37.3439	25.8142	0.691256	1.57222	1.41186	1.07474	0.103985	Bound	Bound
chr6.tRNA120-AlaAGC	chr6	28626013	28626085	-	Ala	AGC	GCU	No canonical tRNA introns	21.7044	13.4367	0.619077	1.33655	1.12829	3.49854	3.49854	1	0.543887	0.543887	8.714	6.8563	0.786815	0.940217	0.83609	33.852	14.7202	0.43484	1.52958	1.16791	21.7496	21.5221	0.98954	1.33745	1.33288	27.1342	17.7991	0.655966	1.43352	1.2504	3.11387	1.63871	Bound	Bound
chr6.tRNA119-AlaCGC	chr6	28641612	28641684	-	Ala	CGC	GCG	No canonical tRNA introns	4.31579	2.10771	0.488372	0.63506	0.323811	6.47483	1.75687	0.271338	0.811228	0.24474	5.28621	1.92431	0.364025	0.723144	0.284275	8.53503	2.34083	0.274261	0.931205	0.36937	29.4515	6.16998	0.209496	1.46911	0.790284	15.8546	3.80038	0.239701	1.20016	0.579827	2.99924	1.5846	Bound	Bound
chr6.tRNA67-AlaAGC	chr6	28678365	28678437	+	Ala	AGC	GCU	No canonical tRNA introns	12.1695	6.04713	0.496909	1.08527	0.781549	2.35264	1.06984	0.45474	0.371555	0.0293188	5.35074	2.54351	0.475357	0.728414	0.405434	2.17877	0.924328	0.424243	0.338211	-0.0341739	7.14068	5.08098	0.711554	0.85374	0.705947	3.94435	2.16714	0.549429	0.595975	0.335887	0.737159	-0.439952	Bound
chr6.tRNA70-AlaCGC	chr6	28697091	28697163	+	Ala	CGC	GCG	No canonical tRNA introns	6.77479	5.64566	0.833334	0.830896	0.751715	3.27037	0	0	0.514597	N/A	4.70702	N/A	N/A	0.672746	N/A	3.00107	1.56055	0.519998	0.477276	0.193278	15.6525	5.46016	0.348836	1.19458	0.737205	6.85378	2.91905	0.425904	0.83593	0.465242	1.45607	0.542084		Bound
chr6.tRNA110-AlaTGC	chr6	28757546	28757618	-	Ala	TGC	GCA	No canonical tRNA introns	50.3593	46.5704	0.924763	1.70208	1.66811	20.7123	16.2885	0.786417	1.31623	1.21188	32.2964	27.542	0.852789	1.50915	1.44	56.48	50.3729	0.891871	1.75189	1.7022	29.4758	15.4255	0.523328	1.46947	1.18824	40.8019	27.8752	0.683184	1.61068	1.44522	1.26336	0.337263	Bound	Bound
chr6.tRNA108-AlaAGC	chr6	28763740	28763812	-	Ala	AGC	GCU	No canonical tRNA introns	450.248	424.315	0.942403	2.65345	2.62769	24.794	11.8646	0.478527	1.39435	1.07425	105.657	70.953	0.671539	2.0239	1.85097	446.228	425.146	0.952755	2.64956	2.62854	383.182	334.753	0.873614	2.58341	2.52472	413.505	377.252	0.912327	2.61648	2.57663	3.91365	1.96851	Bound	Bound
chr6.tRNA106-PheGAA	chr6	28775609	28775682	-	Phe	GAA	UUC	No canonical tRNA introns	11.5924	0.602204	0.0519482	1.06417	-0.220256	4.25909	0	0	0.629317	N/A	7.0266	N/A	N/A	0.846745	N/A	3.12111	1.44051	0.461538	0.494309	0.158516	10.1013	1.22854	0.121622	1.00438	0.0893893	5.61491	1.33031	0.236924	0.749343	0.123953	0.799094	-0.323562		Bound
chr6.tRNA104-AlaTGC	chr6	28785011	28785083	-	Ala	TGC	GCA	No canonical tRNA introns	13.926	12.0817	0.867564	1.14383	1.08213	20.6109	17.4166	0.845019	1.3141	1.24096	16.9419	14.5059	0.856217	1.22896	1.16155	32.0514	31.8713	0.994381	1.50585	1.5034	69.1469	41.0498	0.593661	1.83977	1.61331	47.0771	36.1706	0.768326	1.67281	1.55836	2.77874	1.47443	Bound	Bound
chr6.tRNA101-AlaAGC	chr6	28831461	28831533	-	Ala	AGC	GCU	No canonical tRNA introns	9.93636	2.14535	0.215909	0.997227	0.331498	32.6834	10.455	0.319887	1.51433	1.01932	18.0209	4.73599	0.262805	1.25578	0.675411	8.64307	0.960341	0.111111	0.936668	-0.0175745	60.2741	16.9568	0.281328	1.78013	1.22934	22.8244	4.03538	0.176801	1.3584	0.605885	1.26655	0.340903	Bound	Bound
chr6.tRNA100-LeuCAA	chr6	28863999	28864105	-	Leu	CAA	UUG	Canonical tRNA intron at pos 39-61:CTAAGCTTCCTCCGCGGTGGGGA(23 bp)	5.7661	4.89291	0.848565	0.760882	0.689567	19.9518	11.8646	0.594663	1.29998	1.07425	10.7259	7.61921	0.710359	1.03043	0.88191	2.01672	1.00836	0.5	0.304646	0.00361561	10.8111	3.4763	0.321549	1.03387	0.541117	4.66936	1.87226	0.400967	0.669258	0.272366	0.435337	-1.1998	Bound
chr6.tRNA74-LeuCAA	chr6	28908829	28908934	+	Leu	CAA	UUG	Canonical tRNA intron at pos 39-60:CTTGGCTTCCTCGTGTTGAGGA(22 bp)	2.58948	0.331212	0.127907	0.413213	-0.479894	0.669285	0.015211	0.0227272	-0.174389	-1.81784	1.31647	0.0709793	0.0539163	0.119412	-1.14887	3.45723	1.29646	0.375	0.538728	0.112759	40.3991	23.4817	0.581243	1.60637	1.37073	11.8182	5.51753	0.466868	1.07255	0.741744	8.97714	3.16626		Bound
chr6.tRNA99-GlnCTG	chr6	28909377	28909449	-	Gln	CTG	CAG	No canonical tRNA introns	9.33416	6.38336	0.683871	0.970075	0.805049	5.23259	2.49461	0.476745	0.718717	0.397003	6.98869	3.99049	0.570992	0.844396	0.601026	15.6295	13.0006	0.831799	1.19395	1.11396	37.4567	27.3615	0.730483	1.57353	1.43714	24.1957	18.8604	0.779497	1.38374	1.27555	3.46211	1.79165	Bound	Bound
chr6.tRNA98-LeuAAG	chr6	28911398	28911480	-	Leu	AAG	CUU	No canonical tRNA introns	45.8127	42.0338	0.917514	1.66099	1.6236	71.507	64.7381	0.905339	1.85435	1.81116	57.2357	52.165	0.911406	1.75767	1.71738	59.3311	52.3266	0.881942	1.77328	1.71872	68.3612	53.7644	0.786475	1.83481	1.73049	63.6863	53.0406	0.832842	1.80405	1.72461	1.1127	0.154067	Bound	Bound
chr6.tRNA76-LysTTT	chr6	28918805	28918878	+	Lys	TTT	AAA	No canonical tRNA introns	33.3621	2.25826	0.0676894	1.52325	0.353774	18.1315	3.45797	0.190716	1.25843	0.538821	24.5948	2.79446	0.11362	1.39084	0.446298	38.0295	2.83301	0.0744951	1.58012	0.452248	36.4739	4.82314	0.132235	1.56198	0.68333	37.2436	3.69649	0.0992516	1.57105	0.567789	1.51429	0.598638	Bound	Bound
chr6.tRNA80-IleAAT	chr6	58149253	58149327	+	Ile	AAT	AUU	No canonical tRNA introns	5.25423	0.526928	0.100286	0.720509	-0.278249	17.9744	0.359994	0.0200282	1.25465	-0.443705	9.71811	0.435535	0.0448169	0.987582	-0.360977	14.135	0.405144	0.0286625	1.1503	-0.392391	13.5321	0	0	1.13137	N/A	13.8303	N/A	N/A	1.14083	N/A	1.42314	0.509081	Bound
chr6.tRNA83-LeuTAA	chr6	144537683	144537766	+	Leu	TAA	UUA	No canonical tRNA introns	2.10771	2.10771	1	0.323811	0.323811	95.9055	37.7233	0.393338	1.98184	1.57661	14.2176	8.91683	0.627167	1.15283	0.95021	126.165	53.479	0.423881	2.10094	1.72818	83.7225	53.4868	0.638858	1.92284	1.72825	102.776	53.4829	0.520385	2.01189	1.72821	7.22875	2.85375	Bound	Bound
chr6.tRNA84-GlnTTG	chr6	145503858	145503930	+	Gln	TTG	CAA	No canonical tRNA introns	0.526928	0.526928	1	-0.278249	-0.278249	12.3868	9.75534	0.787559	1.09296	0.989242	2.55479	2.26724	0.887445	0.407355	0.355497	40.7485	38.2576	0.938871	1.61011	1.58272	29.2483	26.7002	0.91288	1.4661	1.42651	34.5228	31.9607	0.925785	1.53811	1.50462	13.513	3.75627		Bound
chr7.tRNA3-ArgCCT	chr7	139025445	139025518	+	Arg	CCT	AGG	No canonical tRNA introns	184.43	56.0401	0.303856	2.26583	1.7485	112.105	19.9721	0.178155	2.04962	1.30042	143.79	33.455	0.232666	2.15773	1.52446	196.45	57.6575	0.293497	2.29325	1.76086	230.422	48.832	0.211924	2.36252	1.6887	212.759	53.0616	0.249398	2.32789	1.72478	1.47965	0.565258	Bound	Bound
chr8.tRNA6-AlaAGC	chr8	67026423	67026496	+	Ala	AGC	GCU	No canonical tRNA introns	94.7618	16.9119	0.178467	1.97663	1.22819	65.2299	3.80276	0.0582978	1.81445	0.580099	78.6213	8.01947	0.102001	1.89554	0.904146	191.24	14.063	0.0735359	2.28158	1.14808	109.473	16.6762	0.152332	2.03931	1.2221	144.691	15.314	0.105839	2.16044	1.18509	1.84036	0.879988	Bound	Bound
chr8.tRNA10-MetCAT	chr8	124169469	124169542	-	Met	CAT	AUG	No canonical tRNA introns	75.2905	5.55031	0.0737186	1.87674	0.744317	0.811255	0	0	-0.0908426	N/A	7.81536	N/A	N/A	0.892949	N/A	2.809	1.00836	0.358975	0.448552	0.00361561	113.283	25.6233	0.226188	2.05416	1.40864	17.8385	5.08306	0.284949	1.25136	0.706125	2.28249	1.19061		Bound
chr9.tRNA7-HisGTG	chr9	14433937	14434009	-	His	GTG	CAC	No canonical tRNA introns	15.4566	1.65606	0.107143	1.18911	0.219076	8.89845	4.79147	0.538461	0.949314	0.680469	11.7277	2.81691	0.240192	1.06921	0.449772	2.52089	0	0	0.401554	N/A	32.397	12.6494	0.39045	1.5105	1.10207	9.03711	N/A	N/A	0.956029	N/A	0.770575	-0.375992	Bound
chr9.tRNA6-AspGTC	chr9	77517989	77518061	-	Asp	GTC	GAC	No canonical tRNA introns	7.82865	0.602204	0.0769231	0.893687	-0.220256	6.03371	4.56331	0.756303	0.780584	0.65928	6.87283	1.65772	0.241199	0.837136	0.219512	4.44158	4.32153	0.972971	0.647537	0.635638	20.3816	13.4199	0.658432	1.30924	1.12775	9.51454	7.61541	0.800397	0.978388	0.881693	1.38437	0.46923	Bound	Bound
chrX.tRNA4-ValTAC	chrX	18693028	18693101	-	Val	TAC	GUA	No canonical tRNA introns	262.45	144.506	0.550604	2.41905	2.15989	623.774	397.888	0.637872	2.79503	2.59976	404.61	239.786	0.592634	2.60704	2.37982	298.852	174.716	0.584624	2.47546	2.24233	931.437	609.014	0.653843	2.96915	2.78463	527.6	326.197	0.618266	2.7223	2.51348	1.30397	0.382912	Bound	Bound
chr10.tRNA6-ValTAC	chr10	5895673	5895746	-	Val	TAC	GUA	No canonical tRNA introns	226.805	167.588	0.738908	2.35565	2.22424	494.951	414.029	0.836505	2.69456	2.61703	335.048	263.413	0.786193	2.52511	2.42064	289.165	196.117	0.678218	2.46115	2.29252	1216.16	724.289	0.595554	3.08499	2.85991	593.018	376.889	0.635544	2.77307	2.57621	1.76995	0.823708	Bound	Bound
chr10.tRNA2-SerTGA	chr10	69524260	69524342	+	Ser	TGA	UCA	No canonical tRNA introns	8.73195	3.3874	0.387932	0.941111	0.529866	22.2182	9.03535	0.406664	1.34671	0.955945	13.9287	5.5323	0.397188	1.14391	0.742906	6.2122	1.17042	0.188407	0.793245	0.0683417	47.3032	35.1422	0.742914	1.67489	1.54583	17.1423	6.41336	0.374126	1.23407	0.807085	1.23072	0.299498	Bound	Bound
chr11.tRNA17-ValTAC	chr11	59318101	59318174	-	Val	TAC	GUA	No canonical tRNA introns	262.45	144.506	0.550604	2.41905	2.15989	628.109	399.84	0.636577	2.79804	2.60189	406.014	240.373	0.592032	2.60854	2.38089	298.852	174.716	0.584624	2.47546	2.24233	936.26	611.266	0.652881	2.9714	2.78623	528.964	326.8	0.61781	2.72343	2.51428	1.30282	0.381641	Bound	Bound
chr11.tRNA16-ValTAC	chr11	59318459	59318532	-	Val	TAC	GUA	No canonical tRNA introns	281.716	131.684	0.467435	2.44981	2.11953	670.867	428.653	0.638954	2.82664	2.63211	434.734	237.585	0.546507	2.63822	2.37582	261.075	125.574	0.480988	2.41677	2.0989	1060.62	669.804	0.631521	3.02556	2.82595	526.214	290.017	0.551139	2.72116	2.46242	1.21043	0.275516	Bound	Bound
chr11.tRNA3-ArgTCT	chr11	59318766	59318852	+	Arg	TCT	AGA	Canonical tRNA intron at pos 38-50:GATAGTTAGAGAA(13 bp)	10.94	3.67595	0.33601	1.03902	0.56537	9.84153	3.09291	0.314271	0.993063	0.490367	10.3762	3.37185	0.324959	1.01604	0.527868	22.2979	6.78241	0.304173	1.34826	0.831384	4.66237	0.182005	0.039037	0.668607	-0.739917	10.1961	1.11105	0.108968	1.00844	0.0457337	0.982642	-0.025262	Bound	Bound
chr11.tRNA14-LysTTT	chr11	59327807	59327880	-	Lys	TTT	AAA	No canonical tRNA introns	35.1687	2.25826	0.0642122	1.54616	0.353774	27.5624	3.45797	0.12546	1.44032	0.538821	31.1341	2.79446	0.0897555	1.49324	0.446298	41.2706	2.83301	0.0686447	1.61564	0.452248	52.3447	4.82314	0.0921419	1.71887	0.68333	46.479	3.69649	0.0795302	1.66726	0.567789	1.49286	0.578082	Bound	Bound
chr11.tRNA13-PheGAA	chr11	59333852	59333925	-	Phe	GAA	UUC	No canonical tRNA introns	1.12411	0	0	0.0508088	N/A	1.62251	1.31829	0.8125	0.210187	0.120011	1.35051	N/A	N/A	0.130498	N/A	4.8017	1.44051	0.3	0.681395	0.158516	14.9426	1.22854	0.0822173	1.17443	0.0893893	8.47053	1.33031	0.157052	0.927911	0.123953	6.27209	2.64895		Bound
chr11.tRNA8-SerGCT	chr11	66115590	66115672	+	Ser	GCT	AGC	No canonical tRNA introns	24.4997	14.5198	0.592652	1.38916	1.16196	0.101407	0.0507034	0.499999	-0.993932	-1.29496	1.57621	0.858023	0.544358	0.197614	-0.0665011	11.5241	5.40192	0.46875	1.06161	0.732548	95.8228	69.4305	0.724572	1.98147	1.84155	33.2306	19.3664	0.582789	1.52154	1.28705	21.0826	4.39798		Bound
chr11.tRNA11-LysTTT	chr11	122430654	122430727	+	Lys	TTT	AAA	No canonical tRNA introns	2.53427	0.263464	0.103961	0.403853	-0.579279	2.3932	1.16618	0.487289	0.378979	0.0667656	2.46273	0.554298	0.225075	0.391416	-0.256257	8.7271	2.71896	0.311554	0.94087	0.434403	24.2735	4.71697	0.194326	1.38513	0.673663	14.5546	3.58124	0.246055	1.163	0.554033	5.90997	2.56315		Bound
chr12.tRNA2-SerCGA	chr12	56584147	56584229	+	Ser	CGA	UCG	No canonical tRNA introns	11.8935	11.8182	0.993669	1.07531	1.07255	20.8391	15.5659	0.746956	1.31888	1.19217	15.7432	13.5632	0.861526	1.19709	1.13236	16.2058	12.2443	0.75555	1.20967	1.08793	6.00618	3.00309	0.5	0.778598	0.477568	9.86585	6.06389	0.614634	0.994134	0.782751	0.626672	-0.674218	Bound	Bound
chr12.tRNA5-AspGTC	chr12	98897280	98897352	+	Asp	GTC	GAC	No canonical tRNA introns	454.814	194.487	0.427619	2.65783	2.28889	447.853	268.551	0.599641	2.65114	2.42903	451.32	228.538	0.506377	2.65448	2.35896	353.952	172.141	0.48634	2.54894	2.23588	1201.9	737.261	0.613413	3.07987	2.86762	652.238	356.248	0.546193	2.81441	2.55175	1.44518	0.531248	Bound	Bound
chr12.tRNA13-AlaTGC	chr12	125406300	125406372	-	Ala	TGC	GCA	No canonical tRNA introns	4.01469	1.80661	0.45	0.603652	0.256864	0.532386	0	0	-0.273773	N/A	1.46197	N/A	N/A	0.164939	N/A	5.11381	3.96141	0.774649	0.708745	0.59785	15.7556	3.95811	0.251219	1.19743	0.597488	8.97614	3.95976	0.441143	0.95309	0.597669	6.13975	2.61818		Bound
chr12.tRNA8-AlaTGC	chr12	125424511	125424583	+	Ala	TGC	GCA	No canonical tRNA introns	6.29805	0.167279	0.0265604	0.799206	-0.776559	6.96665	0.418303	0.0600436	0.843024	-0.378509	6.62392	0.264525	0.0399348	0.821115	-0.577534	3.00107	1.56055	0.519998	0.477276	0.193278	3.20329	0.0182005	0.00568181	0.505596	-1.73992	3.10053	0.168531	0.0543556	0.491436	-0.773319	0.468081	-1.09517	Bound
chr13.tRNA5-GluTTC	chr13	41634873	41634945	-	Glu	TTC	GAA	No canonical tRNA introns	362.321	95.1532	0.262621	2.55909	1.97842	133.593	55.8092	0.417755	2.12578	1.74671	220.008	72.8727	0.331227	2.34244	1.86256	206.047	60.3964	0.29312	2.31397	1.78101	380.861	134.655	0.353554	2.58077	2.12922	280.134	90.1814	0.321922	2.44737	1.95512	1.27329	0.348563	Bound	Bound
chr13.tRNA3-GluTTC	chr13	45492061	45492133	-	Glu	TTC	GAA	No canonical tRNA introns	1051.36	422.638	0.401992	3.02175	2.62597	560.952	228.315	0.407013	2.74893	2.35853	767.96	310.636	0.404495	2.88534	2.49225	756.881	256.966	0.339506	2.87903	2.40988	1236.03	446.835	0.361508	3.09203	2.65015	967.227	338.853	0.350335	2.98553	2.53001	1.25948	0.332823	Bound	Bound
chr14.tRNA1-LeuAAG	chr14	21078290	21078372	+	Leu	AAG	CUU	No canonical tRNA introns	45.8127	42.0338	0.917514	1.66099	1.6236	71.507	64.7381	0.905339	1.85435	1.81116	57.2357	52.165	0.911406	1.75767	1.71738	59.3311	52.3266	0.881942	1.77328	1.71872	68.3612	53.7644	0.786475	1.83481	1.73049	63.6863	53.0406	0.832842	1.80405	1.72461	1.1127	0.154067	Bound	Bound
chr14.tRNA21-ThrTGT	chr14	21081948	21082021	-	Thr	TGT	ACA	No canonical tRNA introns	7.82865	5.87149	0.75	0.893687	0.768748	10.4956	0.456331	0.0434783	1.02101	-0.34072	9.06457	1.63687	0.180579	0.957347	0.214014	10.2036	1.80064	0.176471	1.00875	0.255427	0.0364011	0.0182005	0.499999	-1.43889	-1.73992	0.609444	0.181032	0.297044	-0.215066	-0.742245	0.0672337	-3.89467	Bound
chr14.tRNA2-LeuTAG	chr14	21093528	21093610	+	Leu	TAG	CUA	No canonical tRNA introns	44.6835	42.0338	0.940701	1.65015	1.6236	3.65065	0	0	0.56237	N/A	12.772	N/A	N/A	1.10626	N/A	76.8873	60.1954	0.782904	1.88585	1.77956	84.8145	64.9577	0.76588	1.92847	1.81263	80.7537	62.5312	0.774345	1.90716	1.7961	6.32272	2.66054		Bound
chr14.tRNA20-ThrTGT	chr14	21099318	21099391	-	Thr	TGT	ACA	No canonical tRNA introns	162.61	151.763	0.933294	2.21115	2.18117	18.7349	1.36899	0.0730716	1.27265	0.1364	55.1949	14.414	0.261146	1.7419	1.15878	18.5766	6.84243	0.368336	1.26897	0.83521	30.4707	2.59358	0.0851172	1.48388	0.4139	23.7916	4.21265	0.177064	1.37642	0.624555	0.431047	-1.21408	Bound	Bound
chr14.tRNA3-ProTGG	chr14	21101164	21101236	+	Pro	TGG	CCA	No canonical tRNA introns	218.56	6.98556	0.0319617	2.33957	0.844201	111.38	7.60551	0.0682843	2.04681	0.881128	156.023	7.28895	0.0467171	2.19319	0.862665	283.985	9.63342	0.0339223	2.4533	0.98378	92.3799	0.218406	0.00236422	1.96558	-0.660735	161.971	1.45052	0.00895542	2.20944	0.161523	1.03812	0.053973	Bound	Bound
chr14.tRNA19-TyrGTA	chr14	21121257	21121351	-	Tyr	GTA	UAC	Canonical tRNA intron at pos 38-58:CCTGTAGAAACATTTGTGGAC(21 bp)	5.22914	0.441616	0.0844529	0.71843	-0.354955	1.75941	0.030422	0.017291	0.245367	-1.51681	3.03318	0.115909	0.0382136	0.481899	-0.935884	18.3905	0.792281	0.043081	1.26459	-0.101121	10.7596	0.0485348	0.00451084	1.0318	-1.31395	14.0668	0.196095	0.0139403	1.14819	-0.707534	4.63763	2.21339		Bound
chr14.tRNA4-ThrTGT	chr14	21149848	21149921	+	Thr	TGT	ACA	No canonical tRNA introns	208.463	197.422	0.947036	2.31903	2.2954	11.2562	1.36899	0.121621	1.05139	0.1364	48.4407	16.4399	0.339381	1.68521	1.2159	9.72345	6.84243	0.703704	0.98782	0.83521	13.4684	2.59358	0.192568	1.12932	0.4139	11.4437	4.21265	0.368118	1.05857	0.624555	0.236242	-2.08166	Bound	Bound
chr14.tRNA7-ArgACG	chr14	23398909	23398982	+	Arg	ACG	CGU	No canonical tRNA introns	6.90025	2.70992	0.392728	0.838865	0.432956	3.7267	2.61123	0.700682	0.571324	0.416845	5.07101	2.66012	0.524573	0.705095	0.424901	0.720256	0	0	-0.142513	N/A	7.09821	3.2761	0.461539	0.851149	0.515357	2.26109	N/A	N/A	0.354318	N/A	0.445885	-1.16526	Bound
chr14.tRNA13-LysCTT	chr14	58706612	58706685	-	Lys	CTT	AAG	No canonical tRNA introns	112.286	32.3434	0.288045	2.05033	1.50979	233.525	51.3372	0.219836	2.36833	1.71043	161.931	40.7482	0.25164	2.20933	1.61011	165.221	32.4115	0.196171	2.21807	1.5107	311.66	147.679	0.473846	2.49368	2.16932	226.92	69.1845	0.304885	2.35587	1.84001	1.40134	0.486808	Bound	Bound
chr14.tRNA9-AlaAGC	chr14	89445441	89445514	+	Ala	AGC	GCU	No canonical tRNA introns	11.2913	4.66708	0.413334	1.05274	0.669045	5.2478	2.96615	0.565218	0.719977	0.472193	7.69769	3.72065	0.483346	0.886361	0.570619	12.8446	9.12324	0.710278	1.10872	0.960149	8.65132	0	0	0.937082	N/A	10.5415	N/A	N/A	1.0229	N/A	1.36943	0.453579	Bound
chr15.tRNA11-GluTTC	chr15	26327380	26327452	-	Glu	TTC	GAA	No canonical tRNA introns	992.798	426.126	0.429217	2.99686	2.62954	520.288	233.043	0.447912	2.71624	2.36744	718.708	315.128	0.438465	2.85655	2.49849	704.182	258.932	0.367706	2.84768	2.41319	1183.67	454.385	0.383878	3.07323	2.65742	912.973	343.008	0.375705	2.96046	2.5353	1.2703	0.345166	Bound	Bound
chr15.tRNA7-GlnCTG	chr15	66161399	66161471	-	Gln	CTG	CAG	No canonical tRNA introns	48.1412	13.113	0.272386	1.68252	1.1177	108.495	35.7222	0.329252	2.03541	1.55294	72.2709	21.6431	0.299472	1.85896	1.33532	79.3482	21.9166	0.276208	1.89954	1.34077	529.354	176.209	0.332876	2.72375	2.24603	204.947	62.1442	0.303221	2.31164	1.7934	2.83582	1.50376	Bound	Bound
chr15.tRNA2-LysCTT	chr15	79152903	79152976	+	Lys	CTT	AAG	No canonical tRNA introns	85.1115	32.0172	0.376179	1.92999	1.50538	228.353	51.3372	0.224815	2.35861	1.71043	139.411	40.5422	0.290811	2.1443	1.60791	147.094	32.5315	0.221161	2.16759	1.5123	300.169	148.635	0.495171	2.47737	2.17212	210.126	69.5365	0.330927	2.32248	1.84221	1.50724	0.591911	Bound	Bound
chr15.tRNA4-ArgTCG	chr15	89878303	89878376	+	Arg	TCG	CGA	No canonical tRNA introns	3.91432	0	0	0.592656	N/A	0.912661	0.874634	0.958334	-0.0396905	-0.0581736	1.89009	N/A	N/A	0.276483	N/A	26.1213	5.58198	0.213695	1.41699	0.746788	36.1159	1.54705	0.0428357	1.5577	0.189504	30.7147	2.93864	0.0956753	1.48735	0.468146	16.2504	4.0224		Bound
chr16.tRNA34-GlyCCC	chr16	686735	686806	-	Gly	CCC	GGG	No canonical tRNA introns	186.176	71.4214	0.383623	2.26992	1.85383	183.247	50.9138	0.277842	2.26304	1.70684	184.706	60.302	0.326476	2.26648	1.78033	186.69	43.4674	0.232832	2.27112	1.63816	308.809	146.692	0.475025	2.48969	2.16641	240.107	79.8519	0.332567	2.38041	1.90229	1.29995	0.378451	Bound	Bound
chr16.tRNA2-ArgCCT	chr16	3202900	3202973	+	Arg	CCT	AGG	No canonical tRNA introns	102.631	34.5289	0.336437	2.01128	1.53818	75.1627	18.3394	0.243996	1.876	1.26339	87.8295	25.1642	0.286512	1.94364	1.40078	128.296	44.6378	0.347928	2.10821	1.6497	173.576	44.8128	0.258174	2.23949	1.6514	149.228	44.7252	0.29971	2.17385	1.65055	1.69907	0.764744	Bound	Bound
chr16.tRNA32-LysCTT	chr16	3207405	3207478	-	Lys	CTT	AAG	No canonical tRNA introns	50.4346	5.72094	0.113433	1.70273	0.757467	78.1339	3.24502	0.0415315	1.89284	0.511217	62.7746	4.30866	0.068637	1.79778	0.634342	81.4189	4.38156	0.053815	1.91073	0.641629	379.269	28.1653	0.0742621	2.57895	1.44971	175.726	11.1089	0.0632172	2.24484	1.04567	2.79932	1.48508	Bound	Bound
chr16.tRNA31-PseudoTGG	chr16	3220960	3221031	-	Pseudo	TGG	CCA	No canonical tRNA introns	132.997	2.11775	0.0159233	2.12384	0.325875	32.2677	0.537456	0.0166562	1.50877	-0.269657	65.5096	1.06686	0.0162856	1.8163	0.0281088	71.4854	0	0	1.85422	N/A	5.09615	0	0	0.707242	N/A	19.0867	N/A	N/A	1.28073	N/A	0.291357	-1.77914	Bound
chr16.tRNA6-ProCGG	chr16	3222048	3222120	+	Pro	CGG	CCG	No canonical tRNA introns	12.4054	3.76377	0.303398	1.09361	0.575623	5.95765	0.30422	0.0510638	0.775075	-0.516812	8.59692	1.07005	0.124469	0.934343	0.0294054	3.88938	1.80064	0.462963	0.58988	0.255427	5.53296	2.90299	0.524672	0.742958	0.462846	4.63894	2.28632	0.492853	0.666419	0.359136	0.539605	-0.890024	Bound
chr16.tRNA7-LysCTT	chr16	3225691	3225764	+	Lys	CTT	AAG	No canonical tRNA introns	41.3965	10.5486	0.254819	1.61696	1.02319	28.7793	6.41905	0.223044	1.45908	0.807471	34.5161	8.22873	0.238403	1.53802	0.915333	23.6244	5.25787	0.222561	1.37336	0.72081	46.8118	23.9822	0.512311	1.67036	1.37989	33.2551	11.2292	0.337669	1.52186	1.05035	0.963465	-0.0536952	Bound	Bound
chr16.tRNA10-LysCTT	chr16	3241500	3241573	+	Lys	CTT	AAG	No canonical tRNA introns	77.6341	10.5887	0.136392	1.89005	1.02484	69.9048	8.06184	0.115326	1.84451	0.906434	73.6681	9.23929	0.125418	1.86728	0.965638	50.0698	9.99355	0.199592	1.69958	0.99972	150.315	15.9558	0.106149	2.177	1.20292	86.7539	12.6276	0.145556	1.93829	1.10132	1.17763	0.235888	Bound	Bound
chr16.tRNA12-ArgCCT	chr16	3243917	3243990	+	Arg	CCT	AGG	No canonical tRNA introns	4.99829	1.11408	0.222892	0.698821	0.0469164	12.3159	0.650271	0.0527993	1.09047	-0.186906	7.84592	0.851149	0.108483	0.894644	-0.0699946	2.10075	0.432153	0.205714	0.322374	-0.364362	14.1479	7.82016	0.552744	1.15069	0.893216	5.45172	1.83834	0.337205	0.736533	0.264427	0.694847	-0.525232	Bound	Bound
chr16.tRNA15-ThrCGT	chr16	14379749	14379821	+	Thr	CGT	ACG	No canonical tRNA introns	31.0135	8.12975	0.262136	1.49155	0.910077	16.9603	2.12954	0.12556	1.22943	0.328286	22.9347	4.16084	0.181422	1.36049	0.619181	20.1672	0	0	1.30465	N/A	35.218	0	0	1.54676	N/A	26.6505	N/A	N/A	1.42571	N/A	1.16202	0.216633	Bound
chr16.tRNA27-LeuTAG	chr16	22207031	22207113	-	Leu	TAG	CUA	No canonical tRNA introns	1.95716	0	0	0.291626	N/A	0.253517	0	0	-0.595993	N/A	0.704396	N/A	N/A	-0.152183	N/A	54.8595	35.8327	0.653172	1.73925	1.55428	87.5446	61.5406	0.702963	1.94223	1.78916	69.3012	46.9592	0.67761	1.84074	1.67172	98.3839	6.62035		Bound
chr16.tRNA16-LeuAAG	chr16	22308460	22308542	+	Leu	AAG	CUU	No canonical tRNA introns	45.8127	42.0338	0.917514	1.66099	1.6236	71.507	64.7381	0.905339	1.85435	1.81116	57.2357	52.165	0.911406	1.75767	1.71738	59.3311	52.3266	0.881942	1.77328	1.71872	68.3612	53.7644	0.786475	1.83481	1.73049	63.6863	53.0406	0.832842	1.80405	1.72461	1.1127	0.154067	Bound	Bound
chr16.tRNA23-LysTTT	chr16	73512215	73512288	-	Lys	TTT	AAA	No canonical tRNA introns	1.68115	0.489291	0.291045	0.225606	-0.310433	2.69742	1.77462	0.657895	0.430949	0.249105	2.1295	0.931829	0.437581	0.328278	-0.0306637	15.5395	6.66236	0.428737	1.19144	0.823628	13.2257	4.71697	0.356652	1.12142	0.673663	14.336	5.6059	0.391037	1.15643	0.748646	6.7321	2.75106		Bound
chr16.tRNA22-MetCAT	chr16	87417627	87417700	-	Met	CAT	AUG	No canonical tRNA introns	17.1528	5.55031	0.32358	1.23434	0.744317	0.811255	0	0	-0.0908426	N/A	3.73032	N/A	N/A	0.571746	N/A	17.7543	7.05851	0.397566	1.2493	0.848713	73.0994	22.0682	0.301893	1.86391	1.34377	36.0254	12.4807	0.346443	1.55661	1.09624	9.65745	3.27164		Bound
chr17.tRNA2-LysTTT	chr17	8022472	8022545	+	Lys	TTT	AAA	No canonical tRNA introns	327.95	6.24285	0.019036	2.51581	0.795383	216.838	5.43541	0.0250667	2.33614	0.735232	266.668	5.82516	0.0218442	2.42597	0.765308	370.247	10.0536	0.0271538	2.56849	1.00232	138.776	10.162	0.0732259	2.14231	1.00698	226.675	10.1077	0.044591	2.3554	1.00465	0.850024	-0.234424	Bound	Bound
chr17.tRNA3-GlnCTG	chr17	8023069	8023141	+	Gln	CTG	CAG	No canonical tRNA introns	9.40943	6.43354	0.683733	0.973563	0.80845	5.84103	0.973505	0.166667	0.766489	-0.0116618	7.41355	2.50262	0.337573	0.870026	0.398394	10.2276	7.5987	0.74296	1.00977	0.880739	19.3532	13.2576	0.685034	1.28675	1.12246	14.069	10.037	0.713409	1.14826	1.0016	1.89774	0.924283	Bound	Bound
chr17.tRNA42-LeuTAG	chr17	8023631	8023713	-	Leu	TAG	CUA	No canonical tRNA introns	5.51016	1.62595	0.295082	0.741164	0.211107	23.6836	14.2984	0.603726	1.37445	1.15529	11.4237	4.82167	0.422077	1.05781	0.683197	4.32153	2.2508	0.520834	0.635638	0.352337	1.82005	0	0	0.260083	N/A	2.80453	N/A	N/A	0.44786	N/A	0.245502	-2.0262	Bound
chr17.tRNA4-ArgTCT	chr17	8024242	8024330	+	Arg	TCT	AGA	Canonical tRNA intron at pos 38-52:GTGACGAATAGAGCA(15 bp)	34.8024	0.401469	0.0115357	1.54161	-0.396348	46.8347	0	0	1.67057	N/A	40.3728	N/A	N/A	1.60609	N/A	26.5894	0.720256	0.0270881	1.42471	-0.142513	10.4319	8.09924	0.776392	1.01836	0.908444	16.6547	2.41527	0.145021	1.22154	0.382966	0.412522	-1.27746		Bound
chr17.tRNA41-SerCGA	chr17	8042198	8042280	-	Ser	CGA	UCG	No canonical tRNA introns	8.86745	2.01738	0.227504	0.947799	0.304788	10.2776	4.92837	0.479525	1.01189	0.692703	9.54652	3.15316	0.330294	0.979845	0.498746	3.33118	1.17042	0.351353	0.522598	0.0683417	48.2982	37.5993	0.778482	1.68393	1.57518	12.6842	6.63378	0.522993	1.10326	0.821761	1.32868	0.40999	Bound	Bound
chr17.tRNA8-ThrAGT	chr17	8090477	8090551	+	Thr	AGT	ACU	No canonical tRNA introns	1.95716	0	0	0.291626	N/A	6.71313	0	0	0.826925	N/A	3.62473	N/A	N/A	0.559276	N/A	3.51125	0.090032	0.025641	0.545462	-1.0456	8.65436	0.0227507	0.00262881	0.937235	-1.64301	5.5125	0.045258	0.00821008	0.741348	-1.3443	1.5208	0.604832		Bound
chr17.tRNA10-GlyTCC	chr17	8124865	8124937	+	Gly	TCC	GGA	No canonical tRNA introns	200.137	79.6515	0.397985	2.30133	1.90119	48.9186	19.3941	0.396457	1.68947	1.28767	98.9466	39.3036	0.39722	1.9954	1.59443	152.514	95.1338	0.623771	2.18331	1.97833	116.781	53.4413	0.45762	2.06737	1.72788	133.457	71.3027	0.534275	2.12534	1.85311	1.34878	0.431652	Bound	Bound
chr17.tRNA37-ProCGG	chr17	8126150	8126222	-	Pro	CGG	CCG	No canonical tRNA introns	12.1043	3.76377	0.310945	1.08294	0.575623	6.87031	1.21688	0.177122	0.836976	0.0852478	9.11923	2.14011	0.234681	0.959958	0.330435	3.88938	1.80064	0.462963	0.58988	0.255427	5.53296	2.90299	0.524672	0.742958	0.462846	4.63894	2.28632	0.492853	0.666419	0.359136	0.508699	-0.975116	Bound
chr17.tRNA35-SerAGA	chr17	8129927	8130009	-	Ser	AGA	UCU	No canonical tRNA introns	14.6536	14.1267	0.964043	1.16594	1.15004	3.85346	3.85346	1	0.585851	0.585851	7.51446	7.37812	0.981857	0.875898	0.867946	12.1243	8.52302	0.70297	1.08366	0.930594	7.8869	7.8869	1	0.896906	0.896906	9.77871	8.19879	0.838433	0.990282	0.91375	1.30132	0.379975	Bound	Bound
chr17.tRNA12-TrpCCA	chr17	19411493	19411565	+	Trp	CCA	UGG	No canonical tRNA introns	14.5031	2.40882	0.16609	1.16146	0.381804	10.7998	3.75205	0.347418	1.03342	0.574269	12.5152	3.00633	0.240214	1.09744	0.478036	20.6173	10.8038	0.524016	1.31423	1.03358	11.1175	6.05673	0.544792	1.04601	0.782238	15.1398	8.08923	0.534303	1.18012	0.907907	1.20971	0.274661	Bound	Bound
chr17.tRNA13-GlyCCC	chr17	19764174	19764245	+	Gly	CCC	GGG	No canonical tRNA introns	4.02473	1.51387	0.376142	0.604737	0.180089	#N/A	#N/A	#N/A	#N/A	#N/A	#N/A	#N/A	#N/A	#N/A	#N/A	9.77747	2.86302	0.292818	0.990226	0.456824	22.326	11.1023	0.497281	1.34881	1.04541	14.7747	5.63792	0.381593	1.16952	0.751119	#N/A	#N/A		Bound
chr17.tRNA14-ThrCGT	chr17	29877092	29877164	+	Thr	CGT	ACG	No canonical tRNA introns	7.82865	0.702571	0.0897436	0.893687	-0.15331	10.1153	3.65065	0.360904	1.00498	0.56237	8.89883	1.60151	0.179969	0.949333	0.20453	15.8456	9.36332	0.59091	1.19991	0.97143	4.04052	4.02232	0.995496	0.606437	0.604477	8.00153	6.13696	0.766973	0.903173	0.787953	0.899167	-0.15334	Bound	Bound
chr17.tRNA31-AsnGTT	chr17	36908033	36908107	-	Asn	GTT	AAC	No canonical tRNA introns	56.1053	48.1872	0.858871	1.749	1.68293	44.3249	20.6042	0.464845	1.64665	1.31396	49.8684	31.5097	0.631856	1.69783	1.49844	14.4171	6.52872	0.452846	1.15888	0.814828	34.3323	25.2618	0.735803	1.5357	1.40246	22.248	12.8424	0.577239	1.34729	1.10865	0.446133	-1.16445	Bound	Bound
chr17.tRNA16-GlnTTG	chr17	47269889	47269961	+	Gln	TTG	CAA	No canonical tRNA introns	104.021	67.7906	0.651701	2.01712	1.83117	31.6744	16.2986	0.514567	1.50071	1.21215	57.4004	33.2399	0.579089	1.75891	1.52166	108.663	69.6997	0.64143	2.03608	1.84323	206.309	114.684	0.555885	2.31452	2.0595	149.727	89.406	0.597127	2.1753	1.95137	2.60847	1.3832	Bound	Bound
chr17.tRNA23-ArgCCG	chr17	66016012	66016085	-	Arg	CCG	CGG	No canonical tRNA introns	9.93636	7.82865	0.787879	0.997227	0.893687	18.4814	6.69285	0.36214	1.26673	0.825611	13.5513	7.23851	0.534156	1.13198	0.859649	76.7072	4.32153	0.056338	1.88484	0.635638	154.923	21.8634	0.141124	2.19012	1.33972	109.012	9.72025	0.0891665	2.03748	0.987678	8.04442	3.00799	Bound	Bound
chr17.tRNA18-ArgCCT	chr17	73030000	73030073	+	Arg	CCT	AGG	No canonical tRNA introns	34.0245	8.87749	0.260915	1.53179	0.94829	55.9259	11.0381	0.19737	1.74761	1.04289	43.6217	9.89902	0.226929	1.6397	0.995592	25.449	4.25851	0.167335	1.40567	0.629258	117.29	40.1034	0.341917	2.06926	1.60318	54.6344	13.0683	0.239196	1.73747	1.11622	1.25246	0.324763	Bound	Bound
chr17.tRNA21-ArgCCT	chr17	73030525	73030598	-	Arg	CCT	AGG	No canonical tRNA introns	28.4541	8.17492	0.287302	1.45414	0.912484	56.078	11.1712	0.199208	1.74879	1.0481	39.9456	9.55634	0.239234	1.60147	0.980292	18.7867	4.5016	0.239616	1.27385	0.653367	115.507	40.164	0.347719	2.06261	1.60384	46.5832	13.4463	0.288651	1.66823	1.1286	1.16617	0.221774	Bound	Bound
chr18.tRNA4-LysCTT	chr18	43669270	43669343	-	Lys	CTT	AAG	No canonical tRNA introns	7.77847	3.58813	0.46129	0.890894	0.554868	6.37342	1.81265	0.284408	0.804373	0.258314	7.04098	2.5503	0.362208	0.847633	0.406591	13.3968	3.15112	0.235214	1.127	0.498465	16.8325	10.212	0.606683	1.22615	1.00911	15.0167	5.67267	0.377757	1.17657	0.753788	2.13276	1.09272	Bound	Bound
chr19.tRNA2-GlyTCC	chr19	4724081	4724153	+	Gly	TCC	GGA	No canonical tRNA introns	123.181	71.6673	0.581805	2.09054	1.85532	43.9092	27.7981	0.633081	1.64256	1.44402	73.5444	44.6342	0.606902	1.86655	1.64967	124.052	83.3096	0.67157	2.0936	1.9207	140.966	82.5217	0.585401	2.14911	1.91657	132.239	82.9147	0.627007	2.12136	1.91863	1.79808	0.846459	Bound	Bound
chr19.tRNA13-ValCAC	chr19	4724646	4724719	-	Val	CAC	GUG	No canonical tRNA introns	161.842	62.1775	0.384186	2.20909	1.79363	230.903	88.4521	0.38307	2.36343	1.94671	193.313	74.1602	0.383628	2.28626	1.87017	139.91	63.2024	0.451736	2.14585	1.80073	642.151	205.98	0.320766	2.80764	2.31383	299.739	114.098	0.380659	2.47674	2.05728	1.55054	0.632769	Bound	Bound
chr19.tRNA4-ThrAGT	chr19	33667962	33668036	+	Thr	AGT	ACU	No canonical tRNA introns	1.95716	0	0	0.291626	N/A	3.97515	0	0	0.599354	N/A	2.78927	N/A	N/A	0.44549	N/A	3.51125	0.090032	0.025641	0.545462	-1.0456	8.65436	0.0227507	0.00262881	0.937235	-1.64301	5.5125	0.045258	0.00821008	0.741348	-1.3443	1.97633	0.98282		Bound
chr19.tRNA8-SeCTCA	chr19	45981859	45981945	-	SeC(e)	TCA	UGA	No canonical tRNA introns	145.809	86.1151	0.590602	2.16378	1.93508	93.2436	56.3315	0.604133	1.96962	1.75075	116.601	69.6491	0.597329	2.0667	1.84292	102.216	35.5326	0.347623	2.00952	1.55063	246.654	136.345	0.552778	2.39209	2.13464	158.783	69.6038	0.438359	2.2008	1.84263	1.36176	0.445477	Bound	Bound
chr20.tRNA6-LeuAAG	chr20	48952341	48952423	-	Leu	AAG	CUU	No canonical tRNA introns	29.508	0	0	1.46994	N/A	6.08441	3.0422	0.499999	0.784218	0.483188	13.3992	N/A	N/A	1.12708	N/A	8.28294	1.9807	0.23913	0.918185	0.296819	11.8303	2.27507	0.192309	1.073	0.356995	9.89897	2.12279	0.214445	0.99559	0.326907	0.738773	-0.436797		Bound
chr21.tRNA2-GlyGCC	chr21	18827106	18827177	-	Gly	GCC	GGC	No canonical tRNA introns	18.6683	9.03306	0.483872	1.2711	0.955835	14.9676	5.3847	0.359757	1.17515	0.731162	16.7159	6.97426	0.417224	1.22313	0.843498	23.4083	10.5517	0.450767	1.36937	1.02332	44.4821	24.6496	0.554146	1.64819	1.39181	32.2684	16.1275	0.499791	1.50878	1.20757	1.93041	0.948906	Bound	Bound
chr22.tRNA1-SeCTCA	chr22	44546536	44546622	+	SeC(e)	TCA	UGA	No canonical tRNA introns	22.0306	16.109	0.73121	1.34303	1.20707	52.478	27.3798	0.521739	1.71998	1.43743	34.0018	21.0015	0.617657	1.5315	1.32225	14.3451	4.26151	0.297071	1.1567	0.629564	140.417	77.2385	0.550065	2.14742	1.88783	44.8809	18.1426	0.404238	1.65206	1.2587	1.31996	0.400491	Bound	Bound
