# Supplementary figures and images for: The unfolded protein response and endoplasmic reticulum protein targeting machineries converge on the stress sensor IRE1
Source: eLife journal article supplement (doi:10.7554/elife.43036), 2018-12-24

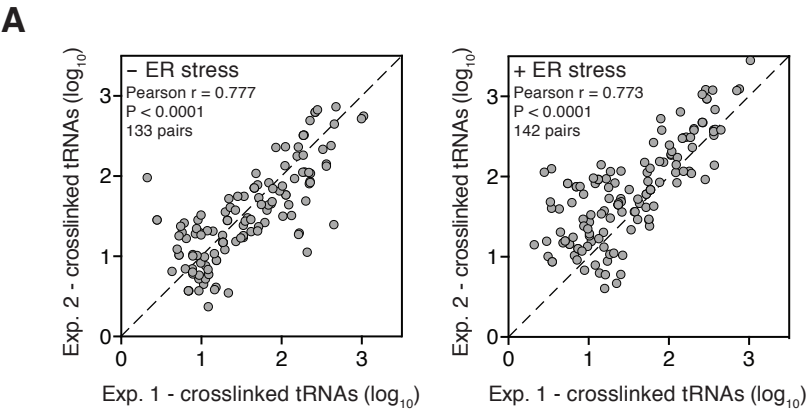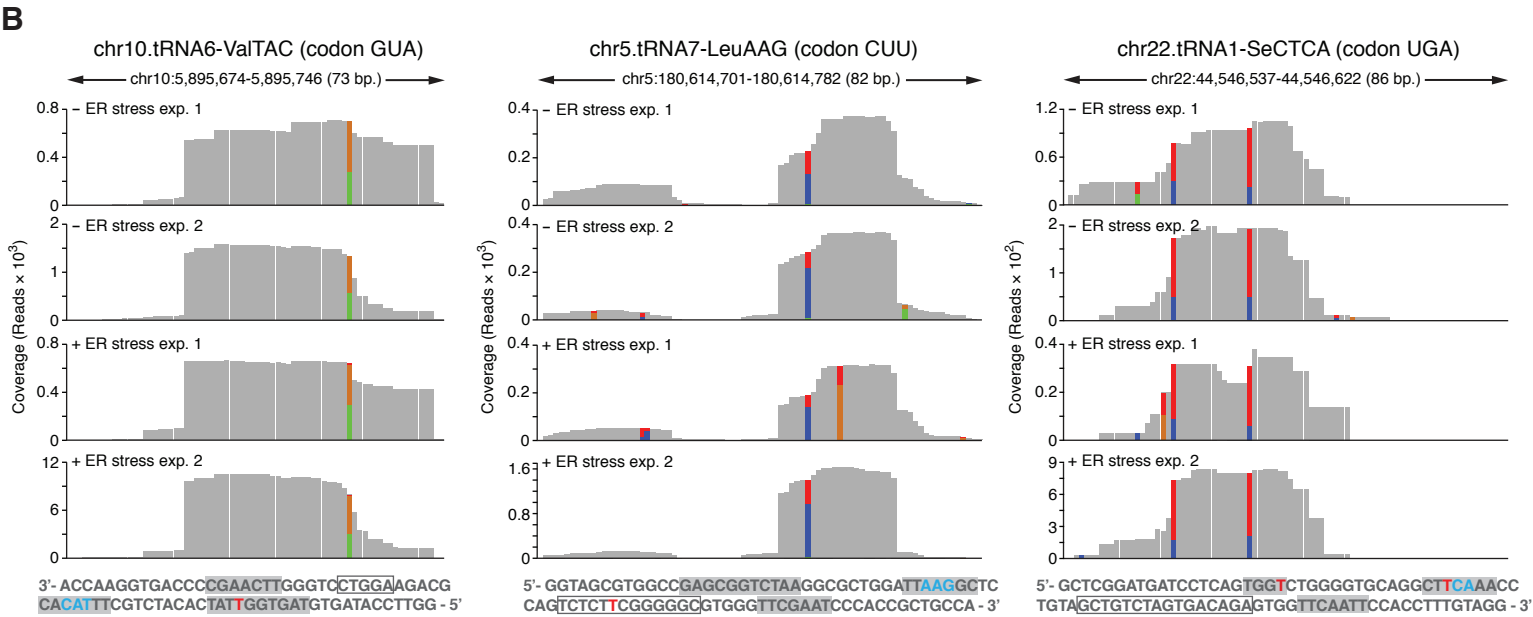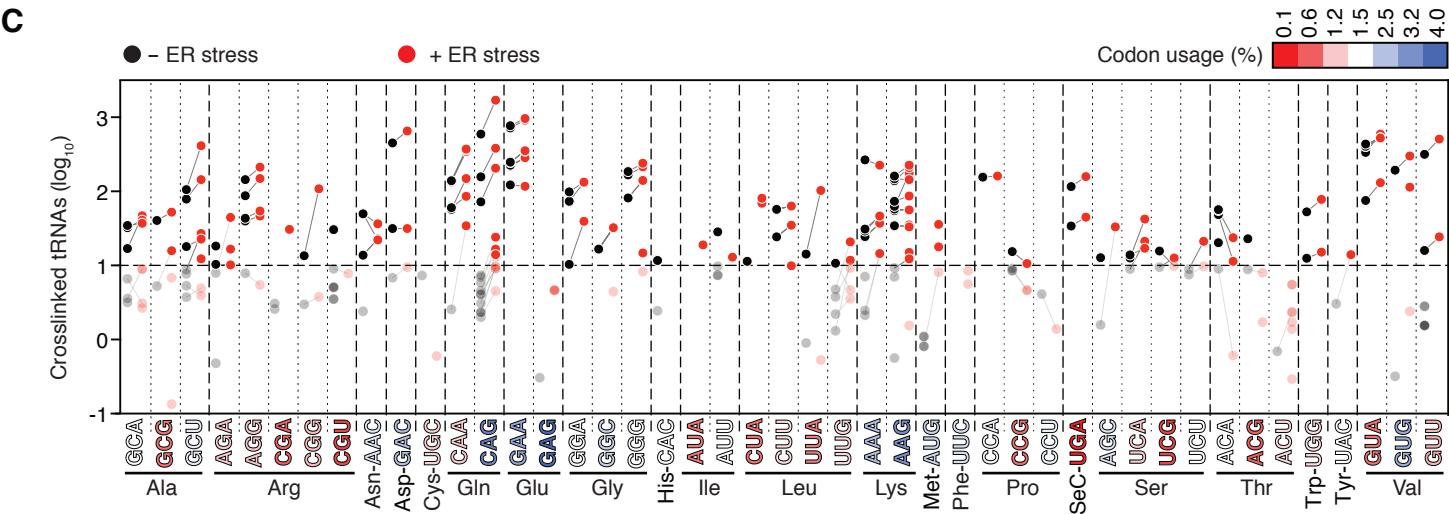

Supplement: supp [file elife-43036-supp-v1.zip]

**A**

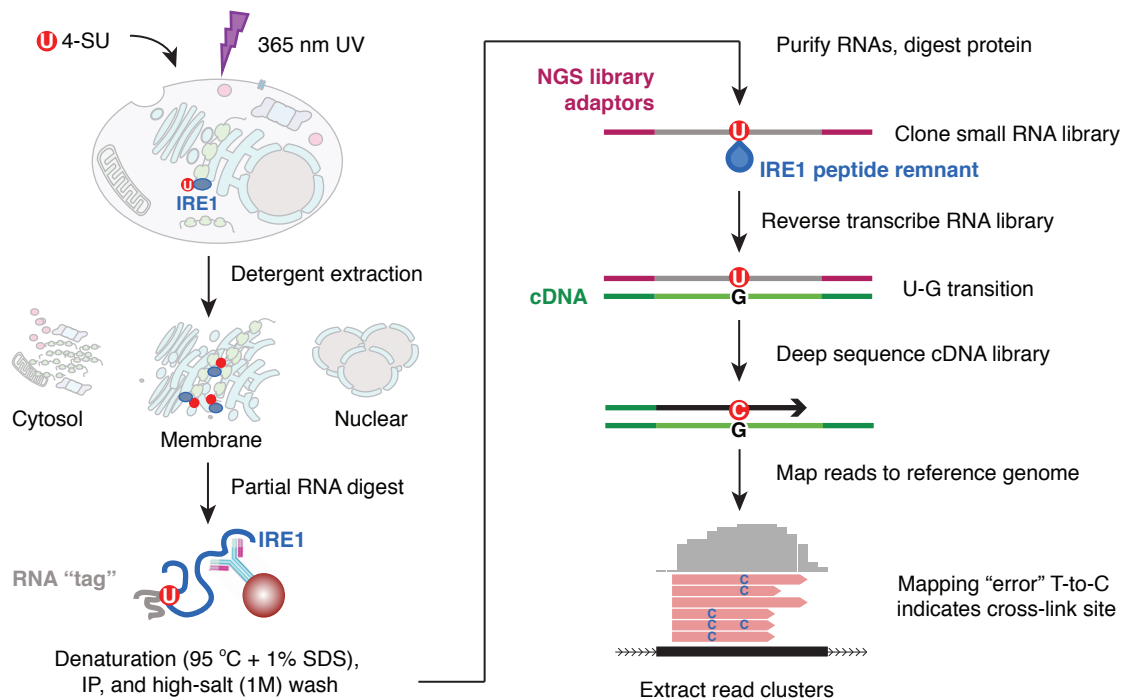

**B**

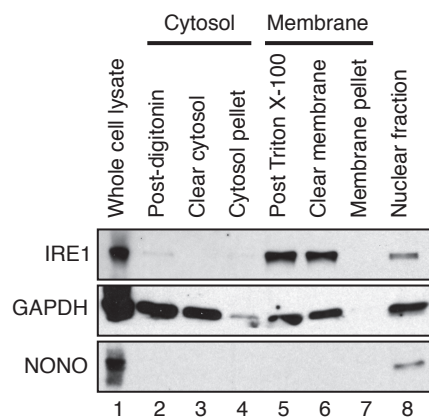

**C**

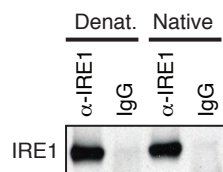

**D**

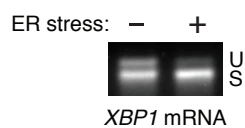

**E**

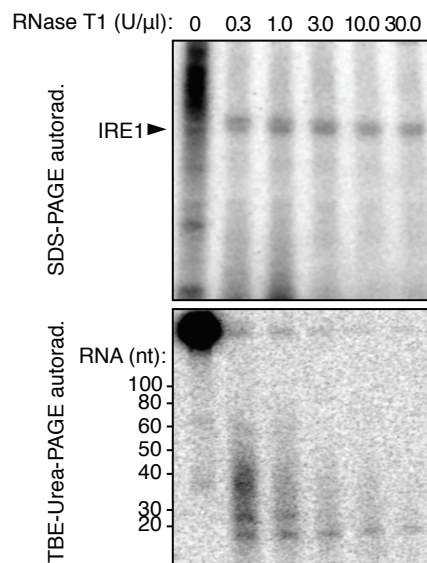

**F**

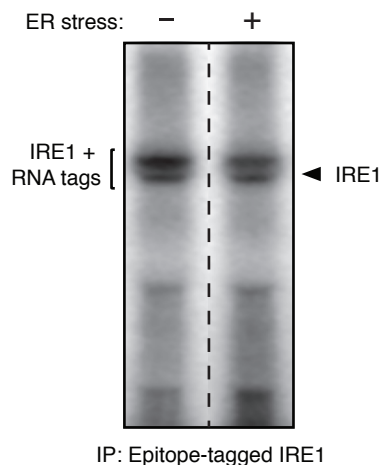

Supplement: supp [file elife-43036-supp-v1.zip]

**A**

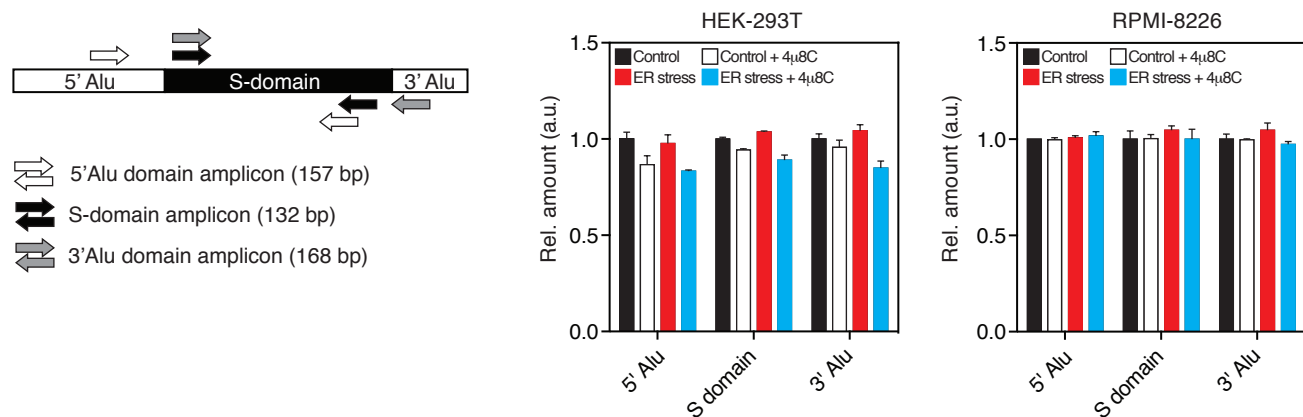

**B**

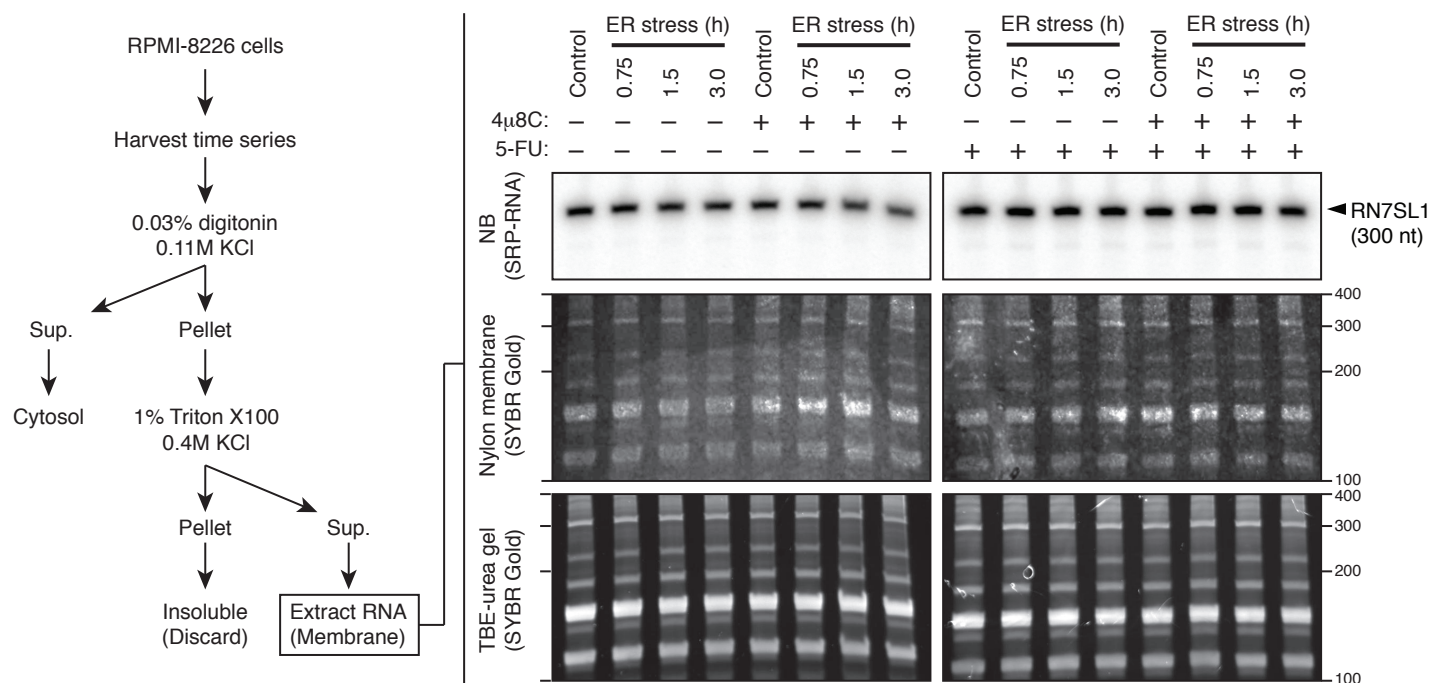

Supplement: supp [file elife-43036-supp-v1.zip]

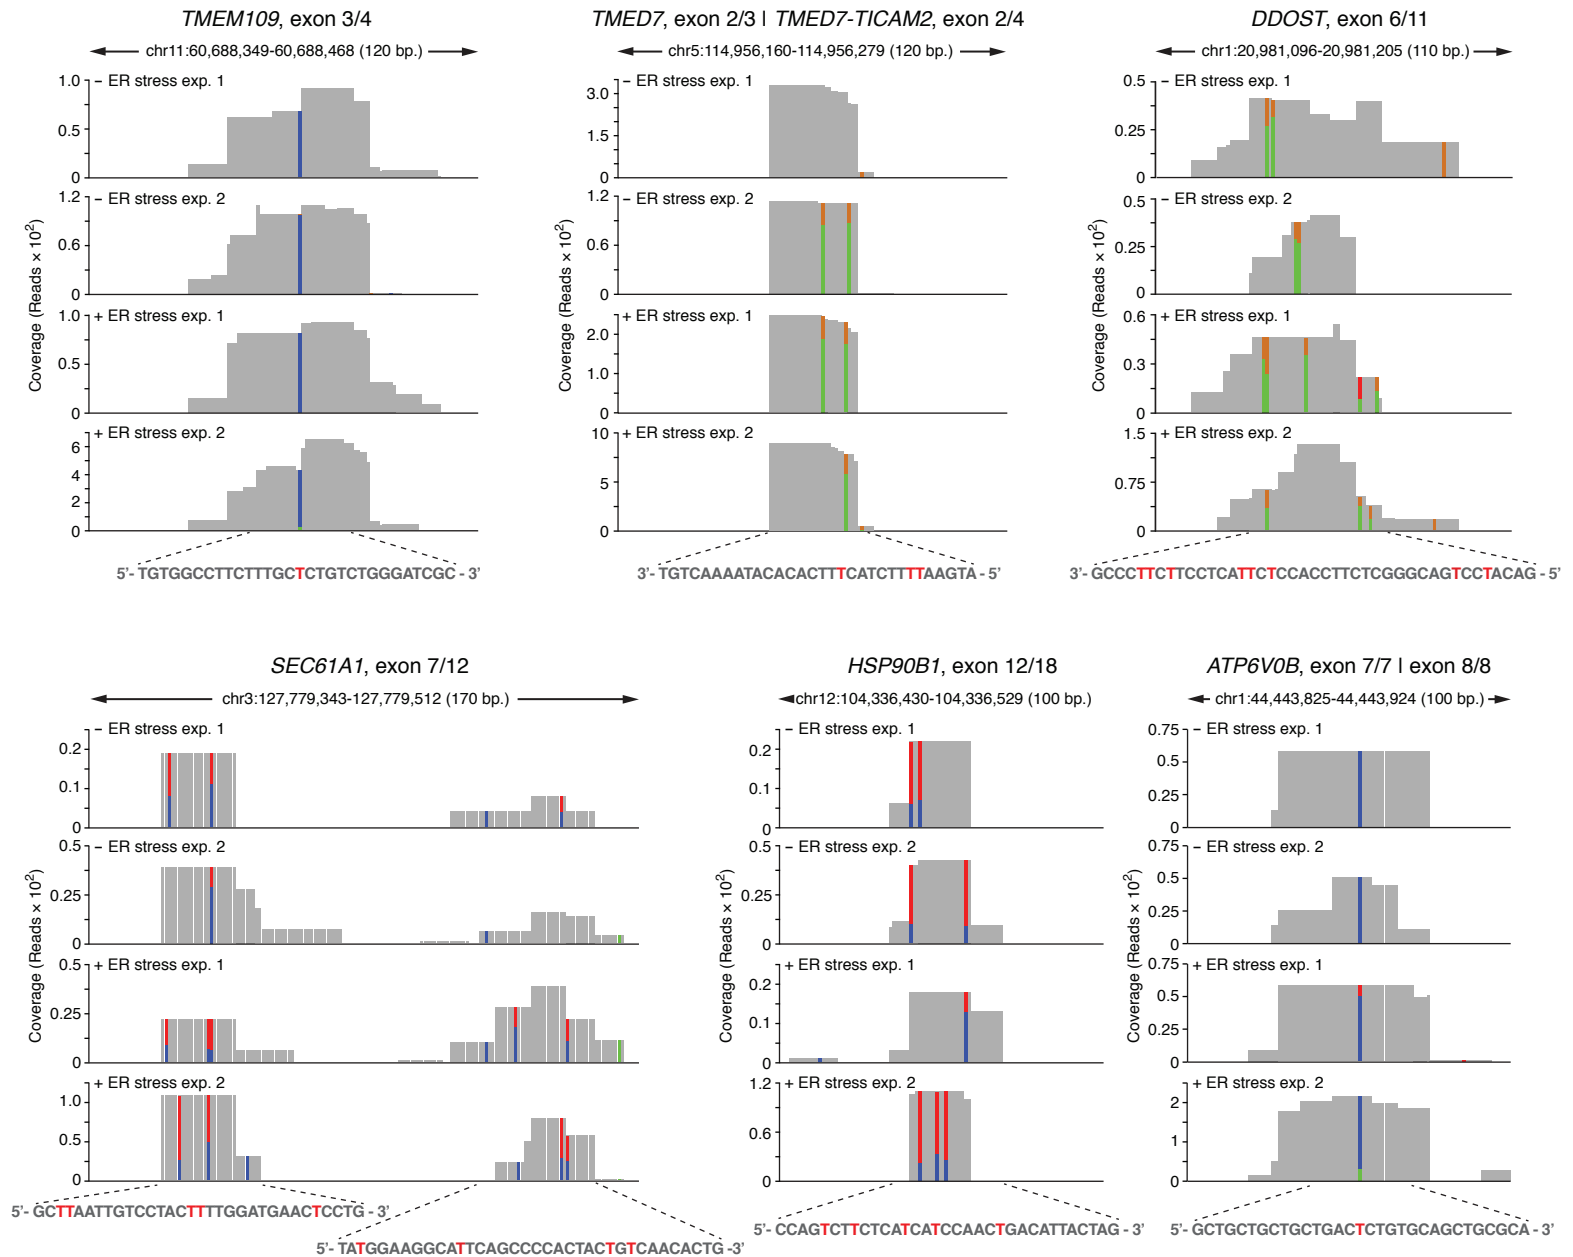

Supplement: supp [file elife-43036-supp-v1.zip]

A

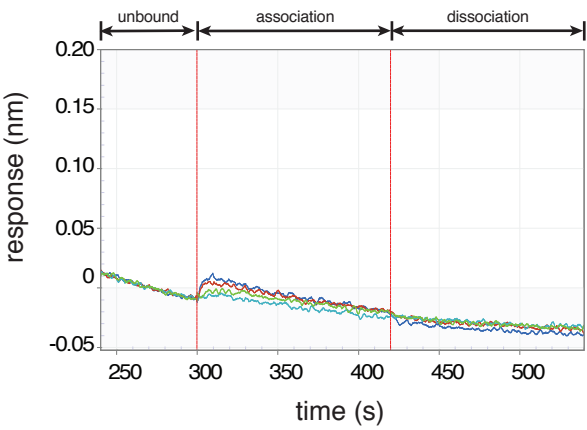

B

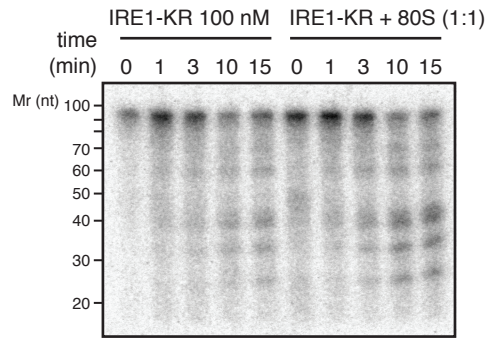

Supplement: supp [file elife-43036-supp-v1.zip]

**A**

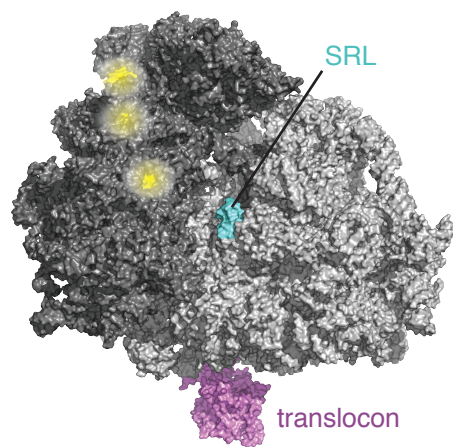

**B**

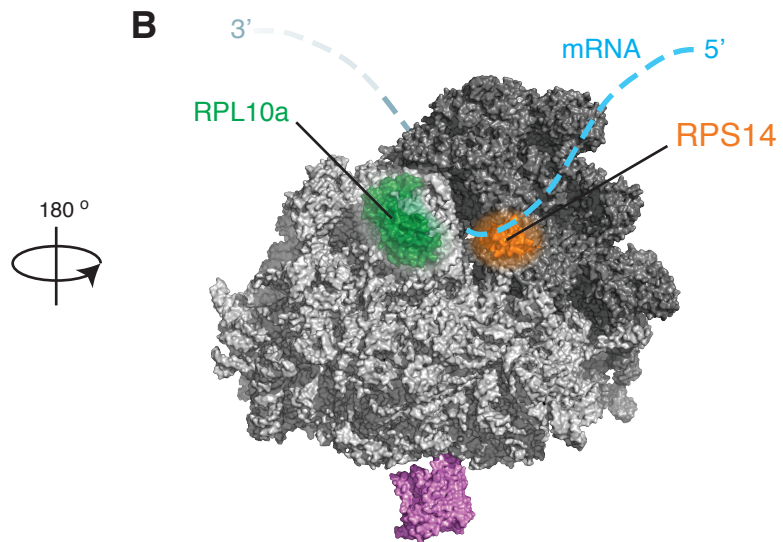

Supplement: supp [file elife-43036-supp-v1.zip]

A

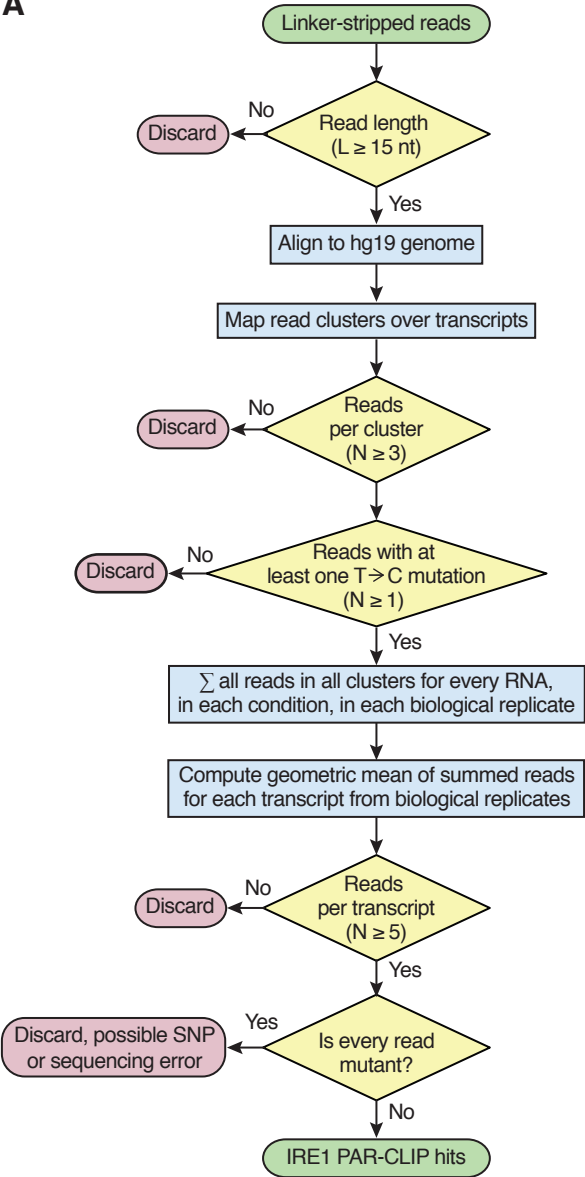

B

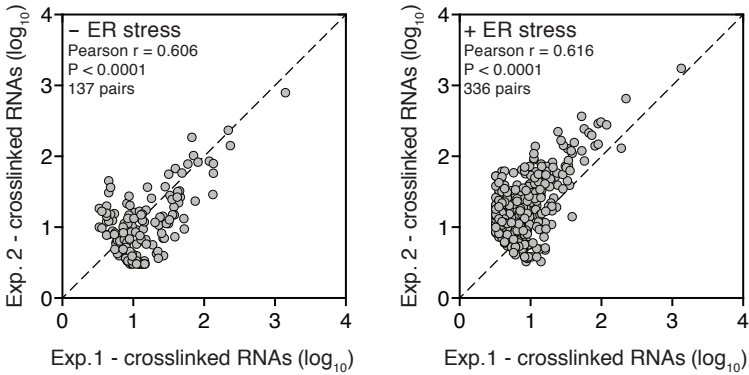

C

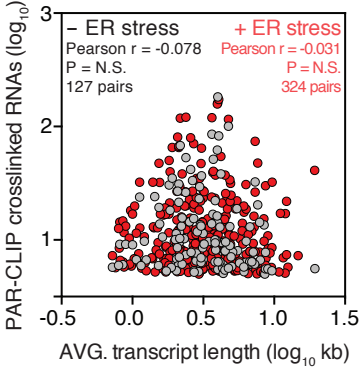

D

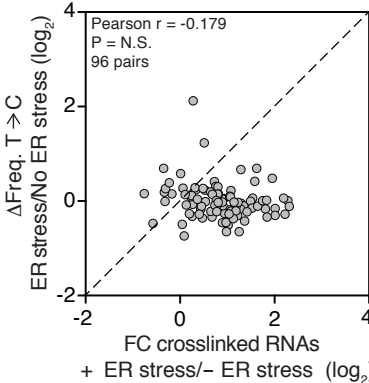

Supplement: supp [file elife-43036-supp-v1.zip]

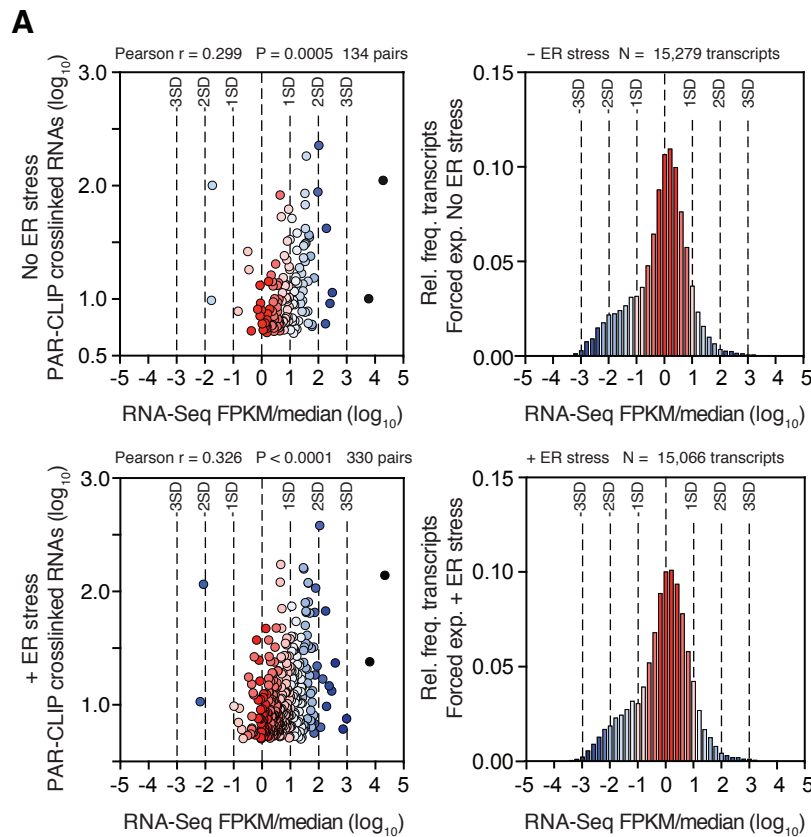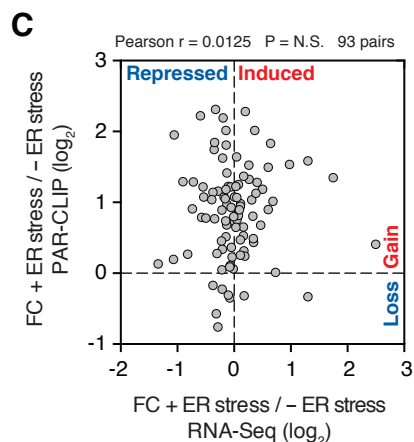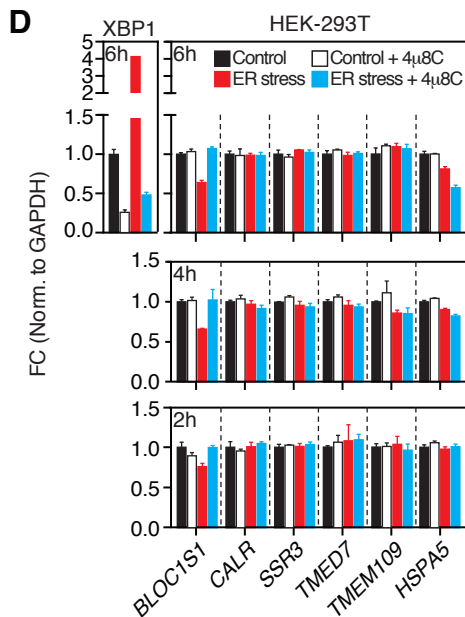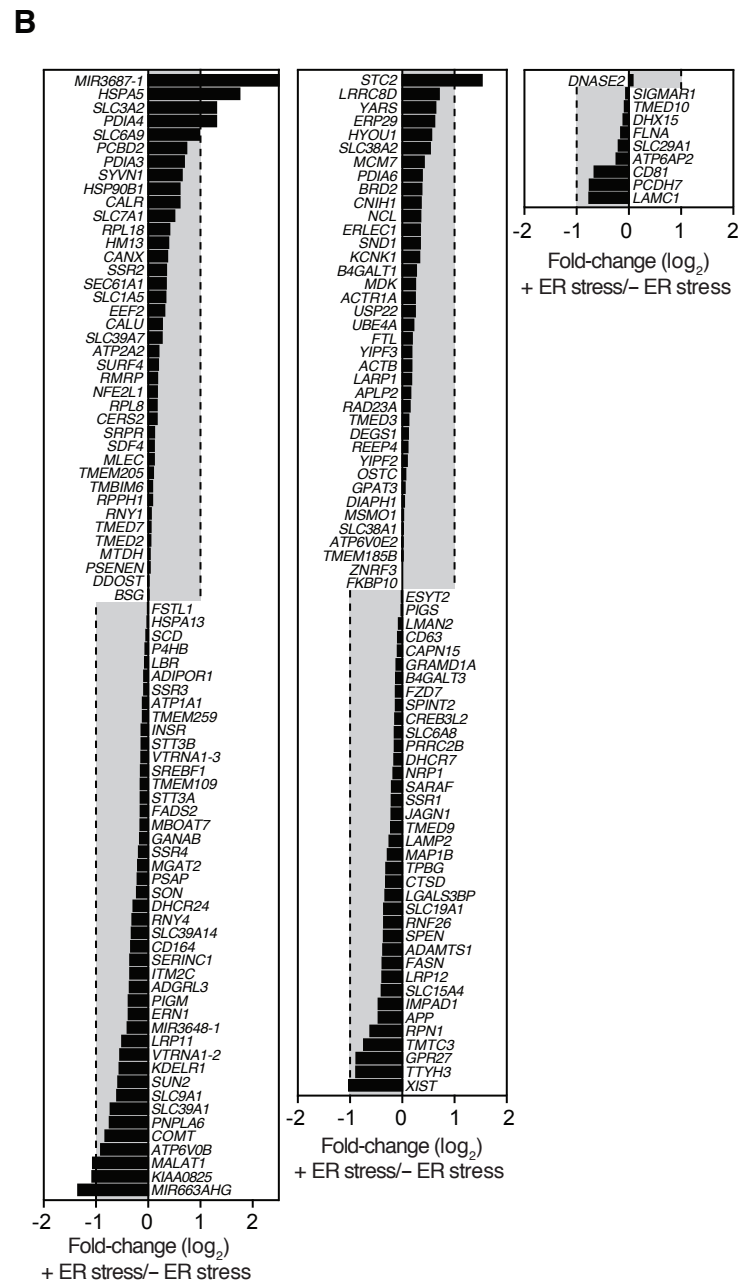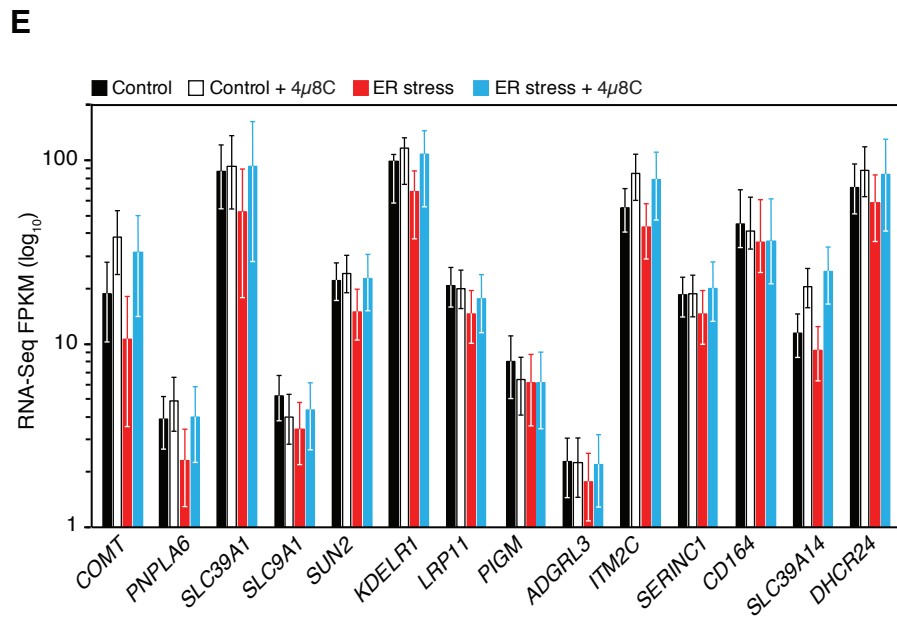

Supplement: supp [file elife-43036-supp-v1.zip]

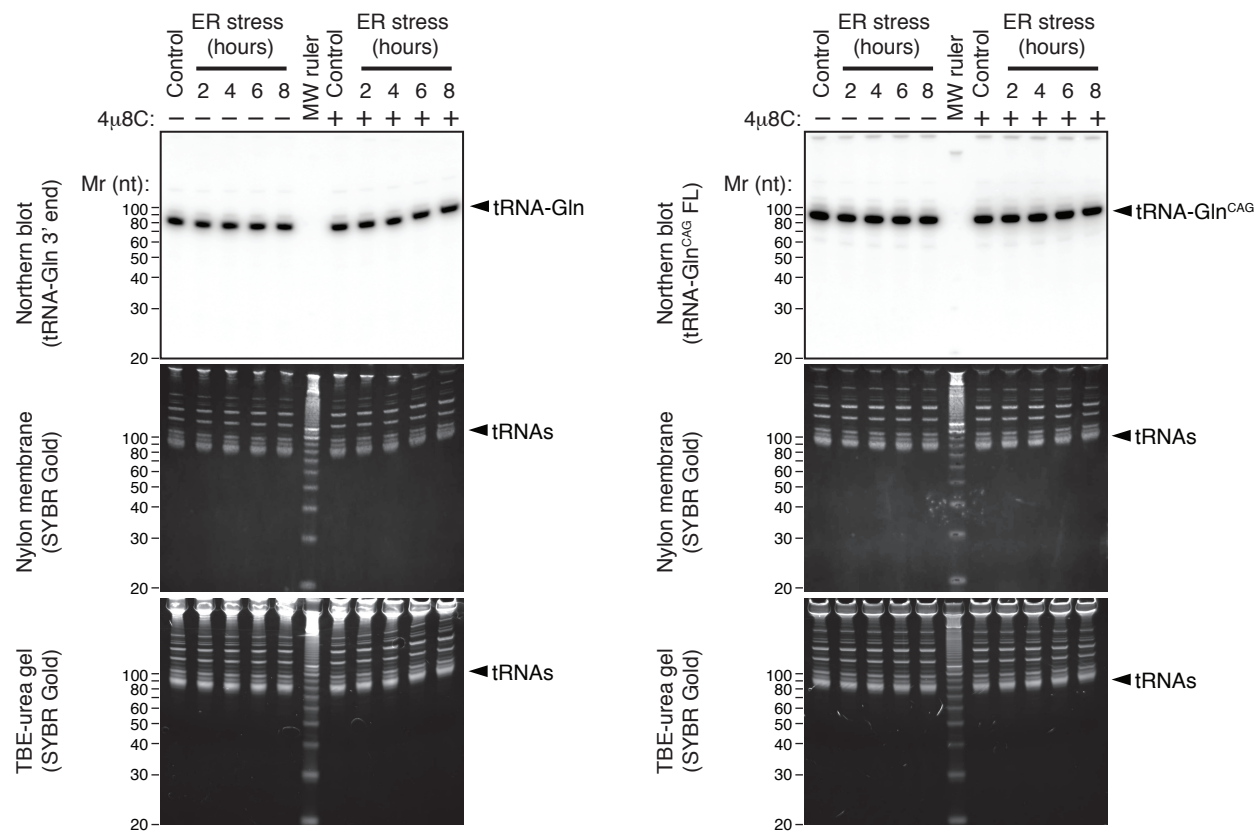

Supplement: supp [file elife-43036-supp-v1.zip]

Homo sapiens

large subunit ribosomal RNA

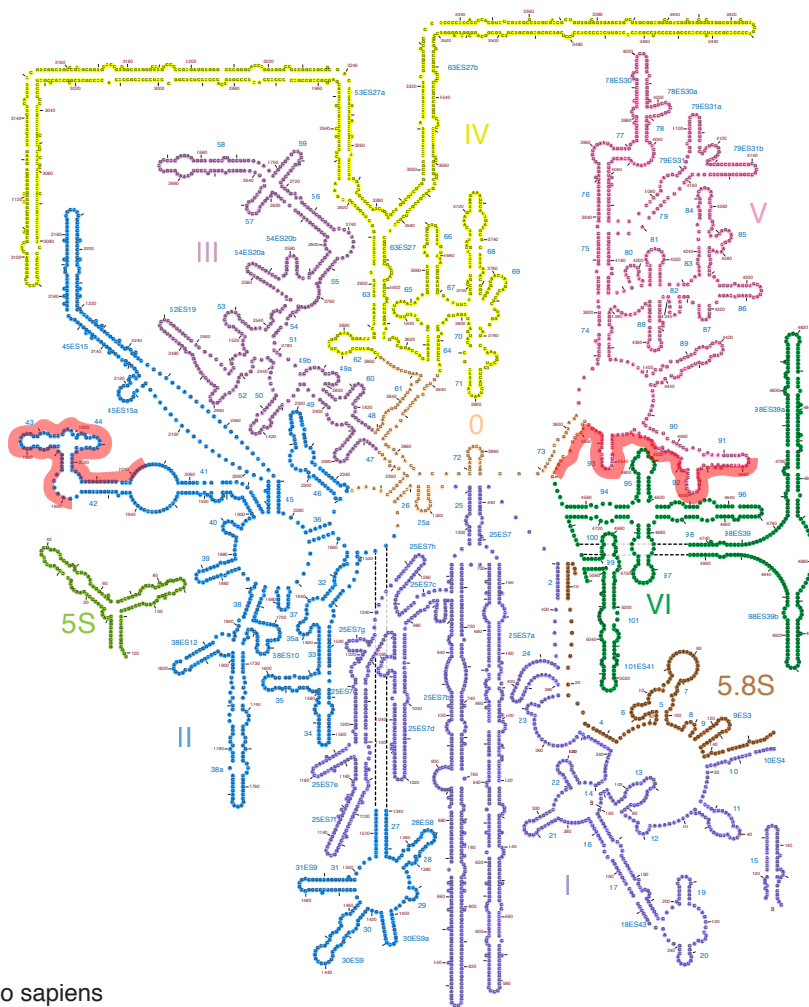

Homo sapiens

small subunit ribosomal RNA

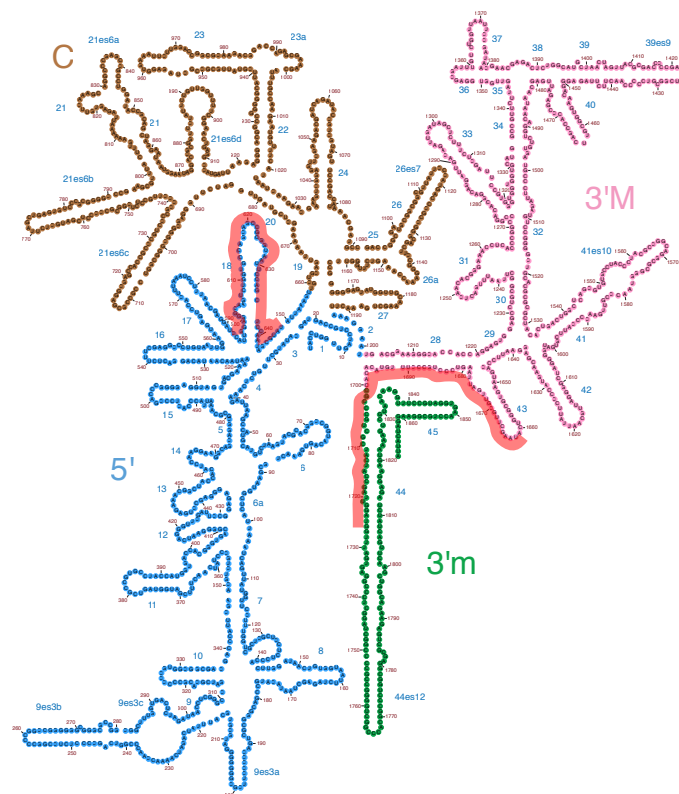

Supplement: supp [file elife-43036-supp-v1.zip]
